# Supplementary material for: Factors influencing allied health professionals’ implementation of upper limb sensory rehabilitation for stroke survivors: a qualitative study to inform knowledge translation
Source: PubMed Central journal article supplement — BMJ Open. 2021 Feb 19;11(2):e042879. doi: 10.1136/bmjopen-2020-042879 (PMC7896620; doi:10.1136/bmjopen-2020-042879), 2021-02-19
Supplement: bmjopen-2020-042879.draft_revisions.pdf [file bmjopen-2020-042879.draft_revisions.pdf]

# BMJ Open

BMJ Open is committed to open peer review. As part of this commitment we make the peer review history of every article we publish publicly available.

When an article is published we post the peer reviewers' comments and the authors' responses online. We also post the versions of the paper that were used during peer review. These are the versions that the peer review comments apply to.

The versions of the paper that follow are the versions that were submitted during the peer review process. They are not the versions of record or the final published versions. They should not be cited or distributed as the published version of this manuscript.

BMJ Open is an open access journal and the full, final, typeset and author-corrected version of record of the manuscript is available on our site with no access controls, subscription charges or pay-per-view fees (<http://bmjopen.bmj.com>).

If you have any questions on BMJ Open's open peer review process please email [info.bmjopen@bmj.com](mailto:info.bmjopen@bmj.com)

# BMJ Open

## Factors influencing allied health professionals' implementation of upper limb sensory rehabilitation for stroke survivors: A qualitative study to inform knowledge translation

|                               |                                                                                                                                                                                                                                                                                                                                                                                                                                                                                                                                                                                                                                                                                                                                                                                                                                                                                                                                                                                                                                                                                                                                                                                                                                                                                                 |
|-------------------------------|-------------------------------------------------------------------------------------------------------------------------------------------------------------------------------------------------------------------------------------------------------------------------------------------------------------------------------------------------------------------------------------------------------------------------------------------------------------------------------------------------------------------------------------------------------------------------------------------------------------------------------------------------------------------------------------------------------------------------------------------------------------------------------------------------------------------------------------------------------------------------------------------------------------------------------------------------------------------------------------------------------------------------------------------------------------------------------------------------------------------------------------------------------------------------------------------------------------------------------------------------------------------------------------------------|
| Journal:                      | <i>BMJ Open</i>                                                                                                                                                                                                                                                                                                                                                                                                                                                                                                                                                                                                                                                                                                                                                                                                                                                                                                                                                                                                                                                                                                                                                                                                                                                                                 |
| Manuscript ID                 | bmjopen-2020-042879                                                                                                                                                                                                                                                                                                                                                                                                                                                                                                                                                                                                                                                                                                                                                                                                                                                                                                                                                                                                                                                                                                                                                                                                                                                                             |
| Article Type:                 | Original research                                                                                                                                                                                                                                                                                                                                                                                                                                                                                                                                                                                                                                                                                                                                                                                                                                                                                                                                                                                                                                                                                                                                                                                                                                                                               |
| Date Submitted by the Author: | 17-Jul-2020                                                                                                                                                                                                                                                                                                                                                                                                                                                                                                                                                                                                                                                                                                                                                                                                                                                                                                                                                                                                                                                                                                                                                                                                                                                                                     |
| Complete List of Authors:     | <p>Cahill, Liana; La Trobe University, Occupational Therapy, School of Allied Health, Human Services and Sport ; Australian Catholic University, Occupational Therapy, School of Allied Health</p> <p>Carey, Leeanne; La Trobe University, Occupational Therapy, School of Allied Health, Human Services and Sport; The Florey Institute of Neuroscience and Mental Health, Neurorehabilitation and Recovery, Stroke</p> <p>Mak-Yuen, Yvonne ; La Trobe University, Occupational Therapy, School of Allied Health, Human Services and Sport; The Florey Institute of Neuroscience and Mental Health, Neurorehabilitation and Recovery, Stroke</p> <p>McCluskey, Annie; The University of Sydney, Sydney School of Health Sciences, Faculty of Medicine and Health; The StrokeEd Collaboration</p> <p>Neilson, Cheryl; La Trobe University, Occupational Therapy, Rural Department of Allied Health, Rural Health School</p> <p>O'Connor, Denise; Cabrini Institute, Monash Department of Clinical Epidemiology; Monash University, Department of Epidemiology and Preventive Medicine, School of Public Health and Preventive Medicine</p> <p>Lannin, Natasha; Monash University, Department of Neuroscience, Central Clinical School ; Alfred Health, Allied Health (Occupational Therapy)</p> |
| Keywords:                     | Stroke < NEUROLOGY, REHABILITATION MEDICINE, QUALITATIVE RESEARCH                                                                                                                                                                                                                                                                                                                                                                                                                                                                                                                                                                                                                                                                                                                                                                                                                                                                                                                                                                                                                                                                                                                                                                                                                               |
|                               |                                                                                                                                                                                                                                                                                                                                                                                                                                                                                                                                                                                                                                                                                                                                                                                                                                                                                                                                                                                                                                                                                                                                                                                                                                                                                                 |

SCHOLARONE™  
Manuscripts

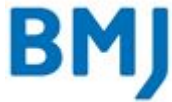

I, the Submitting Author has the right to grant and does grant on behalf of all authors of the Work (as defined in the below author licence), an exclusive licence and/or a non-exclusive licence for contributions from authors who are: i) UK Crown employees; ii) where BMJ has agreed a CC-BY licence shall apply, and/or iii) in accordance with the terms applicable for US Federal Government officers or employees acting as part of their official duties; on a worldwide, perpetual, irrevocable, royalty-free basis to BMJ Publishing Group Ltd ("BMJ") its licensees and where the relevant Journal is co-owned by BMJ to the co-owners of the Journal, to publish the Work in this journal and any other BMJ products and to exploit all rights, as set out in our [licence](#).

The Submitting Author accepts and understands that any supply made under these terms is made by BMJ to the Submitting Author unless you are acting as an employee on behalf of your employer or a postgraduate student of an affiliated institution which is paying any applicable article publishing charge ("APC") for Open Access articles. Where the Submitting Author wishes to make the Work available on an Open Access basis (and intends to pay the relevant APC), the terms of reuse of such Open Access shall be governed by a Creative Commons licence – details of these licences and which [Creative Commons](#) licence will apply to this Work are set out in our licence referred to above.

Other than as permitted in any relevant BMJ Author's Self Archiving Policies, I confirm this Work has not been accepted for publication elsewhere, is not being considered for publication elsewhere and does not duplicate material already published. I confirm all authors consent to publication of this Work and authorise the granting of this licence.

**Title: Factors influencing allied health professionals' implementation of upper limb sensory rehabilitation for stroke survivors: A qualitative study to inform knowledge translation**

**Corresponding author:**

| Name and email                               | Highest qualification | ORCID ID                                                                                  | Affiliations                                                                                                                                                                                                                                                                                                  |
|----------------------------------------------|-----------------------|-------------------------------------------------------------------------------------------|---------------------------------------------------------------------------------------------------------------------------------------------------------------------------------------------------------------------------------------------------------------------------------------------------------------|
| Liana S Cahill<br>Liana.cahill@florey.edu.au | MPH                   | <a href="https://orcid.org/0000-0002-1730-9843">https://orcid.org/0000-0002-1730-9843</a> | 1. Occupational Therapy, School of Allied Health, Human Services and Sport, La Trobe University, Australia<br><br>2. School of Allied Health, Australian Catholic University, Australia<br><br>3. Neurorehabilitation and Recovery, Stroke, The Florey Institute of Neuroscience and Mental Health, Australia |

**Co-authors:**

| Name and email                                  | Highest qualification | ORCID ID                                                                                  | Affiliations                                                                                                                                                                                                                     |
|-------------------------------------------------|-----------------------|-------------------------------------------------------------------------------------------|----------------------------------------------------------------------------------------------------------------------------------------------------------------------------------------------------------------------------------|
| Leeanne M Carey<br>L.Carey@latrobe.edu.au       | PhD                   | <a href="https://orcid.org/0000-0001-6376-8613">https://orcid.org/0000-0001-6376-8613</a> | 1. Occupational Therapy, School of Allied Health Human Services and Sport, La Trobe University, Australia<br><br>2. Neurorehabilitation and Recovery, Stroke, The Florey Institute of Neuroscience and Mental Health, Australia  |
| Yvonne Mak-Yuen<br>Yvonne.Makyuen@florey.edu.au | B Occ Therapy (Hons)  | <a href="https://orcid.org/0000-0002-0476-1769">https://orcid.org/0000-0002-0476-1769</a> | 1. Occupational Therapy, School of Allied Health, Human Services and Sport, La Trobe University, Australia<br><br>3. Neurorehabilitation and Recovery, Stroke, The Florey Institute of Neuroscience and Mental Health, Australia |

|                                                             |                   |                                                                                                  |                                                                                                                                                                                                                                                                                                               |
|-------------------------------------------------------------|-------------------|--------------------------------------------------------------------------------------------------|---------------------------------------------------------------------------------------------------------------------------------------------------------------------------------------------------------------------------------------------------------------------------------------------------------------|
| <p>Annie McCluskey</p> <p>Annie.McCluskey@Sydney.edu.au</p> | <p>PhD</p>        | <p><a href="https://orcid.org/0000-0002-9719-6657">https://orcid.org/0000-0002-9719-6657</a></p> | <p>1. Sydney School of Health Sciences, Faculty of Medicine and Health, The University of Sydney, Sydney, Australia</p> <p>2. The StrokeEd Collaboration, Sydney, Australia</p>                                                                                                                               |
| <p>Cheryl Neilson</p> <p>C.Neilson@latrobe.edu.au</p>       | <p>Masters OT</p> | <p><a href="https://orcid.org/0000-0002-0479-4149">https://orcid.org/0000-0002-0479-4149</a></p> | <p>1. Occupational Therapy, Rural Department of Allied Health, Rural Health School, La Trobe University, Bendigo, Australia</p>                                                                                                                                                                               |
| <p>Denise A O'Connor</p> <p>Denise.OConnor@monash.edu</p>   | <p>PhD</p>        | <p><a href="https://orcid.org/0000-0002-6836-122X">https://orcid.org/0000-0002-6836-122X</a></p> | <p>1. Monash Department of Clinical Epidemiology, Cabrini Institute, Malvern, Australia</p> <p>2. Department of Epidemiology and Preventive Medicine, School of Public Health and Preventive Medicine, Monash University, Melbourne, Australia</p>                                                            |
| <p>Natasha A Lannin</p> <p>Natasha.Lannin@monash.edu</p>    | <p>PhD</p>        | <p><a href="https://orcid.org/0000-0002-2066-8345">https://orcid.org/0000-0002-2066-8345</a></p> | <p>1. Department of Neurosciences, Central Clinical School, Monash University, Melbourne, Australia</p> <p>2. Allied Health (Occupational Therapy), Alfred Health, Melbourne, Australia</p> <p>3. Occupational Therapy, School of Allied Health, Human Services and Sport, La Trobe University, Australia</p> |

**Abbreviated title:** *Implementation of post-stroke sensory rehabilitation: A qualitative study*

**Key words:** Occupational therapy, physical therapy, somatosensory disorders, implementation science, health services research, neurosciences

**Word Count:** 261 (Abstract)  
4980 (Introduction, Procedures, Findings, Discussion)

1  
2  
3 20 **References:** 46  
4 21

5 22 **Tables:** 3  
6 23

7 24 **Appendices:** 4  
8 25  
9  
10  
11 26  
12

## 13 27 **ABSTRACT**

14  
15  
16 28

17  
18 29 **Objectives** Somatosensory loss is common after stroke with one-in-two individuals affected.

19  
20 30 Although clinical practice guidelines recommend providing somatosensory rehabilitation, this  
21  
22 31 impairment often remains unassessed and untreated. To address the gap between guideline  
23  
24 32 recommendations and clinical practice, this study sought to understand the factors influencing  
25  
26 33 delivery of evidence-based upper limb sensory rehabilitation after stroke.

27  
28  
29 34 **Design** Qualitative focus group interviews. Data analysis used an inductive approach  
30  
31 35 (thematic analysis) and deductive analysis using implementation theory (Theoretical Domains  
32  
33 36 Framework and Normalisation Process Theory).

34  
35  
36 37 **Setting** Eight healthcare organisations in metropolitan and regional areas of Victoria and New  
37  
38 38 South Wales, Australia.

39  
40 39 **Participants:** Eighty-seven rehabilitation therapists (79% occupational therapists and 21%  
41  
42 40 physiotherapists) were purposively recruited and participated.

43  
44 41 **Results:** Three types of factors influenced therapists' delivery of upper limb somatosensory  
45  
46 42 rehabilitation: individual (*'The uncertain, unskilled therapist'*), patient (*'Patient*  
47  
48 43 *understanding and priorities'*) and organisational (*'System pressures and resources'*).

49  
50 44 Deductive analysis using implementation theory identified key determinants of practice  
51  
52 45 change, such as opportunities to consolidate new skills, the anticipated benefits of upskilling  
53  
54 46 as a therapy team and the work anticipated by therapists to incorporate a new somatosensory  
55  
56 47 rehabilitation approach.  
57  
58  
59  
60

1  
2  
3 48 **Conclusions:** Occupational therapists and physiotherapists hold valuable insights towards  
4  
5 49 practice change in somatosensory rehabilitation from the ‘frontline’. Therapists experience  
6  
7  
8 50 barriers to change including a lack of knowledge and skills, lack of resources and  
9  
10 51 organisational pressures. Facilitators for change were identified, including social support and  
11  
12 52 therapists’ perceived legitimacy in using new somatosensory rehabilitation approaches.  
13  
14 53 Results will inform the design of a tailored implementation strategy to increase the use of  
15  
16 54 evidence-based somatosensory rehabilitation in Australia.

17  
18  
19 55 **Trial registration:** Australian New Zealand Clinical Trials Registry  
20  
21 56 (ACTRN2615000933550)  
22  
23

24 57

#### Strengths and limitations of this study

##### Strengths:

- This study used a qualitative design with inductive and deductive data analysis using two knowledge translation theories to increase credibility of findings
- Participants (n=87) from eight different health organisations contributed to a representative sample of stroke rehabilitation therapists
- Three independent researchers were involved in data analysis to increase validity

##### Limitations:

- Focus groups included therapists of different grades and levels, which may have introduced a power differential in groups and potential for response bias
- The perspectives of stroke survivors and health organisation managers were not included in this study

25  
26  
27  
28  
29  
30  
31  
32  
33  
34  
35  
36  
37  
38  
39  
40  
41  
42  
43  
44 58  
45  
46  
47  
48  
49  
50  
51  
52  
53  
54  
55  
56  
57  
58  
59  
60

## 60 BACKGROUND

61 Half of all stroke survivors experience somatosensory loss<sup>1-4</sup> yet treatment for this impairment  
62 has been historically overlooked.<sup>5,6</sup> Research reveals a persistent evidence-practice gap in the  
63 area of somatosensory rehabilitation.<sup>7-9</sup> Occupational therapists and physiotherapists are  
64 professionally responsible for the assessment and treatment of somatosensory loss after  
65 stroke. Their accurate detection of somatosensory deficits, such as impaired touch,  
66 proprioception or haptic object recognition, give stroke survivors an opportunity for  
67 treatment. Standardised assessments are underutilised by occupational therapists and  
68 physiotherapists and informal measures are much more common.<sup>7</sup> Treatment for  
69 somatosensory loss typically focusses on compensation (such as providing education to avoid  
70 limb injury) with a lack of evidence-based treatments aimed at regaining somatosensory  
71 function.<sup>7</sup> These practices may discount stroke survivors' perceptions of somatosensory loss  
72 as 'significant', 'concerning', and having a negative impact on daily life, promoting a  
73 perception the impairment cannot be treated.<sup>10-12</sup>

74  
75 Following the publication of a Cochrane review<sup>13</sup> evidence for somatosensory rehabilitation  
76 has increased.<sup>14</sup> A more recent systematic review found that discrimination retraining  
77 programmes may improve upper limb somatosensory impairment after stroke.<sup>15</sup> Clinical  
78 guidelines provide recommendations about the assessment and treatment of somatosensory  
79 loss.<sup>16-18</sup> However, clinical audits suggest that these recommendations are not widely  
80 implemented.<sup>8</sup>

81 Factors contributing to the underuse of somatosensory assessment and rehabilitation were  
82 explored in one Australian study.<sup>19</sup> Occupational therapists and physiotherapists in this study  
83 based their assessment and treatment choices on prior knowledge and clinical experience  
84 rather than research, as well as organisational factors such as time available and patient length



1  
2  
3 85 of stay.<sup>19</sup> Patient factors also influenced practice; somatosensory assessments were often not  
4  
5 86 completed if a stroke survivor did not raise loss of sensation as a concern, or therapists  
6  
7 87 believed that a patient could not participate in the assessment. These factors are consistent  
8  
9  
10 88 with other areas of stroke rehabilitation where implementation of evidence-based practice is  
11  
12 89 influenced by health professionals' lack of time, knowledge, staffing issues and patient factors  
13  
14 90 such as prioritisation and safety.<sup>20</sup> Authors have recommended further research into specific  
15  
16 91 factors influencing clinical decision-making and practice for stroke survivors with  
17  
18 92 somatosensory loss.<sup>7,21</sup>  
19  
20  
21  
22  
23

24 94 The aim of our study was to understand the barriers and enablers faced by occupational  
25  
26 95 therapists and physiotherapists in the implementation of somatosensory assessments and  
27  
28 96 interventions for stroke survivors, to provide an explanation of underlying mechanisms that  
29  
30 97 enhance or inhibit such implementation. As this study sought to explore barriers, enablers and  
31  
32 98 any other factors influencing implementation of somatosensory guidelines in practice, the use  
33  
34 99 of implementation theories was warranted, and included the Theoretical Domains  
35  
36  
37 100 Framework<sup>22</sup> and Normalisation Process Theory.<sup>23</sup> Implementation science is a field of study  
38  
39 101 dedicated to methods for increasing research use in practice.<sup>24</sup> The use of theory is central to  
40  
41 102 implementation science.<sup>25</sup> Theory helps provide a framework for investigating influences on  
42  
43 103 behaviour, and a process for guiding behaviour change interventions.<sup>26</sup> Theoretical  
44  
45 104 approaches in implementation science are often interdisciplinary, drawing on fields of  
46  
47 105 psychology, sociology and economics.<sup>27</sup> Multiple theories are sometimes used to provide  
48  
49 106 different perspectives and avoid a 'conceptual straight-jacket'.<sup>28</sup>  
50  
51  
52  
53  
54  
55

56 108 One study has previously used an implementation theory to investigate clinical behaviour in  
57  
58 109 somatosensory rehabilitation.<sup>29</sup> A group of nineteen occupational therapists completed an  
59  
60

1  
2  
3 110 online questionnaire prior to participating in a workshop based on the Theory of Planned  
4  
5 111 Behaviour. Therapists reported lacking the necessary knowledge and skills to deliver  
6  
7 112 somatosensory rehabilitation, lack of resources and time to locate evidence and use new  
8  
9 113 somatosensory assessments and treatments. That study sample was small and was limited to a  
10  
11 114 self-report questionnaire. A more in-depth study is required, involving interviews with both  
12  
13 115 occupational therapists and physiotherapists who provide somatosensory rehabilitation to  
14  
15 116 stroke survivors.  
16  
17  
18  
19  
20

117

## 118 **PROCEDURE**

119 This qualitative study presents data from interviews conducted with occupational therapists  
120 and physiotherapists, to enable the development of a tailored implementation strategy. A  
121 primary goal of the implementation strategy was to improve the routine use of somatosensory  
122 assessments and interventions after stroke (Trial Registry ACTRN2615000933550).<sup>30</sup>  
123

124

### 124 **Design**

125 We used a descriptive qualitative design to explore determinants of practice<sup>31</sup> and help  
126 explain and describe complex processes and behaviours. Data were collected at eight  
127 healthcare organisations using pre-implementation questionnaires and focus group interviews  
128 of one-hour duration. Two members of the research team (LSC and YMY) attended focus  
129 groups, one person moderating the group, the other person taking notes about group  
130 interaction and non-verbal communication. If therapists were unable to attend the focus  
131 group, separate interviews were held face-to-face or via telephone by LSC. Interview  
132 questions (Appendix 1) were open-ended and informed by the Theoretical Domains  
133 Framework.<sup>22</sup> Interviews were audio-recorded with participant consent and transcribed  
134 verbatim by authors (LSC and YMY). Field notes were taken during and after each interview.

## 135 **Participants**

136 Participants were graduate occupational therapists and physiotherapists working with stroke  
137 survivors in participating healthcare organisations. Organisations were recruited to the study  
138 through telephone and email contact, and face-to-face meetings with managers. Purposive  
139 recruitment of therapists occurred during an information session held at the eight participating  
140 organisations, presented by LSC and YMY. All therapists attending provided written consent  
141 to participate in the study (Ethics approval reference: H2013/04956 HREC/13/Austin/8).

142

## 143 **Research team and reflexivity**

144 LSC acted as a facilitator-researcher for interviews and primary coding-researcher. YMY was  
145 a facilitator-researcher for interviews. NAL and AM were coding-researchers. LSC is a  
146 neurological occupational therapist with a Masters of Public Health. She is a lecturer  
147 completing a doctorate on knowledge translation in somatosensory rehabilitation. LSC has  
148 experience assessing and treating somatosensory loss in stroke survivors, with an interest in  
149 somatosensory rehabilitation which may have been known to participants and be a potential  
150 source of bias. LSC had previously worked with some participants at four sites but not at the  
151 time of the interviews. YMY is a neurological occupational therapist completing her doctorate  
152 on standardised assessment in somatosensory rehabilitation. LSC and YMY have published  
153 and presented about somatosensation in stroke rehabilitation at conferences.

154

155 NAL and AM are experienced neurological occupational therapists with PhDs, who have been  
156 involved in the development of stroke clinical guidelines and stroke implementation studies.  
157 NAL and AM were not involved in data collection, and did not know the source of quotes  
158 they were coding.

159

## 160 **Data analysis**

161 All transcripts were given a unique identifier. A two-staged approach to analysis was used to  
162 inductively identify key themes (Stage 1), then data were deductively coded against the TDF  
163 and NPT (Stage 2) using a theory-informed approach. Two members of the research team  
164 conducted the analysis in each phase.

### 166 Stage 1: Thematic Analysis

167 First an inductive approach was applied using thematic analysis to identify and interpret key  
168 themes.<sup>32,33</sup> Two researchers (LSC and AM) open coded a sample (20%) of transcripts line-  
169 by-line, then met regularly to develop and revise the coding framework. LSC analysed  
170 remaining transcripts with ongoing consultation with co-authors. An audit trail of discussions  
171 and decisions was kept, leading to resultant codes, categories and ultimate themes. Any  
172 discrepancies were resolved through discussion and review of the original transcripts.

### 174 Stage 2: Analysis using the Theoretical Domains Framework and Normalisation Process

#### 175 Theory

#### 177 *Theoretical Domains Framework (TDF)*

178 A deductive analysis approach was then taken using the TDF.<sup>22</sup> LSC and NAL separately  
179 coded a sample of transcripts (20%) to relevant domains of the TDF and met regularly to  
180 compare and discuss coding decisions. LSC analysed the remaining transcripts, which were  
181 collated into domain codes, discussed and revised through an iterative process with NAL. See  
182 Appendix 2 for the TDF codebook.

1  
2  
3 185 *Normalisation Process Theory (NPT)*

4  
5 186 A complementary deductive analysis occurred using NPT (May & Finch, 2009).<sup>23</sup> Coding to  
6  
7  
8 187 NPT provided insights into how teams of therapists conceptualised somatosensory  
9  
10 188 rehabilitation. It is acknowledged NPT constructs need to be given their own working  
11  
12 189 definition for individual settings<sup>34</sup> to make NPT ‘at home’ in the context of the study (May et  
13  
14 190 al., 2020).<sup>35</sup> This process was completed through iterative discussion between LSC and AM  
15  
16 191 (See Appendix 3 for NPT codebook). LSC and AM separately coded a sample of transcripts  
17  
18 192 (20%) to categories and constructs of the NPT, followed by discussion. LSC analysed the  
19  
20 193 remaining transcripts, resultant category and construct codings were reviewed, discussed and  
21  
22 194 refined in meetings with AM.  
23  
24  
25

26 195

27  
28 196 The coding frameworks and domains, categories and constructs in the second and third stages  
29  
30 197 of analysis were reviewed for agreement by NAL and AM.  
31  
32

33 198

## 34 35 199 **FINDINGS**

36  
37  
38 200

39  
40 201 Eighty-seven occupational therapists and physiotherapists participated in interviews across  
41  
42 202 eight healthcare organisations. Two sites were private healthcare organisations and six were  
43  
44 203 public healthcare organisations. Tables 1 and 2 outline participant and site characteristics.  
45  
46

47 204

48 205

49 206

50 207

51 208

52 209

53 210

54 211

55 212

56 213

57 214

58 215

59 216

60 217

218

219

220 Table 1. Characteristics of participants

| Characteristic                                | n = 87     |
|-----------------------------------------------|------------|
| Sex, number female (%)                        | 80 (92)    |
| Discipline, number (%)                        |            |
| Occupational Therapist                        | 69 (79)    |
| Physiotherapist                               | 18 (21)    |
| Highest Education Level, number (%)           |            |
| Bachelor Degree                               | 72 (83)    |
| Coursework Masters                            | 8 (9)      |
| Research Masters                              | 6 (7)      |
| Not specified                                 | 1 (1)      |
| Years of clinical experience (yrs), mean (SD) | 10.6 (2.1) |
| Years of working in stroke (yrs)              | 7.9 (3.5)  |

223  
224 Table 2. Number of participants attending interviews at the eight sites (n=87)

| Organisation | Type of health service and location | Focus Group Interview | Small group / Individual interviews |
|--------------|-------------------------------------|-----------------------|-------------------------------------|
|              |                                     | No. of therapists     | No. of therapists                   |
| 1            | Tertiary, Metropolitan              | 10                    | 1                                   |
| 2            | Tertiary, Metropolitan              | 9                     | 0                                   |
| 3            | Tertiary, Regional                  | 12                    | 3*                                  |
| 4            | Tertiary, Metropolitan              | 10                    | 3*                                  |
| 5            | Tertiary, Metropolitan              | 6                     | 1                                   |
| 6            | Tertiary, Regional                  | 6                     | 1                                   |
| 7            | Tertiary, Metropolitan              | 12                    | 0                                   |
| 8            | Tertiary, Metropolitan              | 6 and 7^              | 0                                   |

227  
228  
229 \* One small group interview with three participants

230 ^ Two separate focus group interviews held at geographically separate sites within same organisation

231

232 Table 3 provides an overview of themes and codes in different analysis stages.

233

Table 3: Overview of themes and prominent codes

|                           | Phase 1:<br><i>Thematic coding</i>                                                                 | Phase 2:<br><i>Theoretical Domains Framework</i>                                                                                                                                         | Phase 2:<br><i>Normalisation Process Theory</i>                                                                                                                                       |
|---------------------------|----------------------------------------------------------------------------------------------------|------------------------------------------------------------------------------------------------------------------------------------------------------------------------------------------|---------------------------------------------------------------------------------------------------------------------------------------------------------------------------------------|
| <b>Inductive analysis</b> | Themes:                                                                                            | Key domains:                                                                                                                                                                             | Key categories and constructs:                                                                                                                                                        |
|                           | (1) <i>The uncertain unskilled therapist</i>                                                       | <b>Knowledge</b><br>[Whether or not the therapist has knowledge of evidence-based sensory rehabilitation and how to do it]                                                               | <b>Individual specification (Coherence)</b><br>[Does the therapist acknowledge their personal role in, and responsibility to use evidence-based sensory rehabilitation?]              |
|                           | Subtheme:<br><i>The importance of getting it right</i>                                             | <b>Skills</b><br>[Whether or not the therapist has the ability and competence to provide evidence-based sensory rehabilitation]                                                          | <b>Internalisation (Coherence)</b><br>[Does the therapist identify any benefit from adopting evidence-based sensory rehabilitation? Therapist coming to a conclusion about its worth] |
|                           | (2) <i>The patient's understanding and priorities</i>                                              | <b>Environmental context and resources</b><br>[Whether or not the therapist believes the environmental context – physical or cultural - supports delivery of sensory rehabilitation]     | <b>Legitimation (Cognitive Participation)</b><br>[Does the therapist believe it is appropriate for them to deliver evidence-based sensory rehabilitation?]                            |
|                           | Subthemes:<br><i>Needing to focus on patient goals</i><br><i>Helping the patient to understand</i> | <b>Social professional role and identity</b><br>[Whether identity as an occupational therapist or physiotherapist influences whether they provide evidence-based sensory rehabilitation] |                                                                                                                                                                                       |
|                           | (3) <i>System pressures and resources</i>                                                          | <b>Social influences</b><br>[Interpersonal processes causing therapists to change their thoughts, feelings or behaviours towards evidence-based sensory rehabilitation]                  |                                                                                                                                                                                       |
|                           | Subthemes:<br><i>Not having the right tools</i><br><i>Sharing or deferring professional roles</i>  |                                                                                                                                                                                          |                                                                                                                                                                                       |
|                           |                                                                                                    |                                                                                                                                                                                          |                                                                                                                                                                                       |
|                           |                                                                                                    |                                                                                                                                                                                          |                                                                                                                                                                                       |
|                           |                                                                                                    |                                                                                                                                                                                          |                                                                                                                                                                                       |

1  
2  
3 237 Phase 1: Thematic analysis  
4

5 238 Three main themes or factors, and associated sub-themes, were found to influence therapists'  
6  
7 239 delivery of upper limb somatosensory rehabilitation: The uncertain unskilled therapist,  
8  
9  
10 240 patient understanding and priorities, and system pressures and resources.  
11

12 241

13  
14  
15 242 *Theme one: The uncertain unskilled therapist*

16  
17 243 A key finding was a self-identified lack of knowledge, skill and confidence to deliver  
18  
19 244 somatosensory rehabilitation. Therapists expressed negative emotions related to these  
20  
21 245 experiences and were concerned about using new somatosensory approaches in the 'right'  
22  
23  
24 246 way. Therapists acknowledged they often had little awareness of standardised assessments:  
25

26 247

27  
28 248 *"It was realising there's...objective assessments...and not knowing any of them! So that's a*  
29  
30 249 *bit scary"* (Physiotherapist, Site 1)  
31

32 250

33  
34  
35 251 Uncertainty about using assessment information to address sensory loss was also  
36  
37 252 acknowledged:  
38

39 253

40  
41  
42 254 *"I find that I tend to assess, but then I don't know what to do with that information."*  
43  
44 255 (Occupational therapist, Site 5)  
45

46 256

47  
48 257 Therapists were aware of their limitations when required to deliver somatosensory  
49  
50 258 rehabilitation. They experienced various emotions including "guilt" and "frustration":  
51

52 259

53  
54  
55 260 *"I feel a little bit guilty...about what I have been doing in the past. This...shows me how much*  
56  
57 261 *more I could have been doing"*(Occupational Therapist, Site 5)  
58

59 262  
60



1  
2  
3 263 Therapists expressed a lack of confidence related to somatosensory rehabilitation, which led  
4  
5 264 them to deprioritise this area of practice and focus on others:  
6  
7  
8 265

9  
10 266 *“I find that it isn't a priority for me to assess...as I don't feel confident with it and it kind of*  
11  
12 267 *gets pushed to the left over time in the session” (Occupational therapist, Site 2)*  
13  
14 268

15  
16 269

17  
18  
19 270 Subtheme: The importance of getting it right

20  
21 271 Therapists felt a weight of responsibility to change their practice, and use new knowledge and  
22  
23 272 skills appropriately to benefit patients:  
24  
25 273

26  
27  
28 274 *“I think there's also that little bit of hesitation of something new.... am I going to do it right?”*  
29  
30 275 *(Occupational therapist, Site 8)*  
31  
32 276

33  
34 277 Lack of skill consolidation after upskilling in evidence-based sensory rehabilitation was a  
35  
36 278 concern to some therapists. Without consistency of practice some therapists worried they  
37  
38 279 might not be ready when the need for their somatosensory skills arose:  
40  
41 280

42  
43 281 *“I also feel a little bit nervous...with doing this amazing training and there will be no-one to*  
44  
45 282 *use it on for 6 months... when I finally get to that client, will I be ready?” (Occupational*  
46  
47 283 *therapist, Site 8)*  
48  
49 284

50  
51  
52 285 *Theme two: The patient's understanding and priorities*  
53 286

54  
55 287 This theme encompassed therapists' perceptions of patient understanding of sensation, the  
56  
57 288 goals set in rehabilitation and the therapist's role in helping patients understand sensation.  
58  
59 289

60 289 Therapists wanted to be guided by patients and set patient-centred goals, but highlighted a

1  
2  
3 290 lack of understanding about sensation by some stroke survivors. Sensation was seen as a  
4  
5 291 more abstract concept to patients when contrasted with physical deficits which were more  
6  
7  
8 292 easily described and understood:  
9

10 293

11  
12 294 *“There’s often a confusion between motor and sensation, like sometimes they’ll say ‘My*  
13  
14 295 *muscles need to be stronger’ but when you test it’s very obvious that it’s not actually a motor*  
15  
16 296 *issue, it’s...more of a sensory impairment” (Occupational therapist, Site 6)*  
17

18  
19 297

20  
21 298 Patient priorities were often perceived to be in areas other than somatosensory rehabilitation,  
22  
23 299 particularly for inpatients:  
24

25 300

26  
27 301 *“From an inpatient perspective it’s [sensation] quite often... not the client’s priority”*  
28  
29 302 *(Occupational therapist, Site 2)*  
30

31 303

32  
33  
34 304 Subtheme: Needing to focus on patient goals  
35

36 305 Goal setting, as a tenet of stroke rehabilitation, was proposed to guide therapists in practice.

37  
38  
39 306 However, not all patients wanted to set ‘sensory-goals’ and this perception impacted on  
40  
41 307 therapists’ clinical decision-making to conduct somatosensory assessments and provide  
42  
43 308 subsequent treatment:  
44

45 309

46  
47  
48 310 *“You can’t assess it (sensation) and treat it if it’s not their goal. It has to be goal driven”*  
49  
50 311 *(Occupational therapist, Site 6)*  
51

52 312

53  
54 313 Subtheme: Helping patients to understand  
55

56 314 When patients lacked an understanding of sensation, many therapists believed it was part of  
57  
58  
59 315 their professional role to increase patients’ knowledge about the impact of somatosensory  
60

1  
2  
3 316 loss on upper limb function. Therapists at separate sites independently described the  
4  
5 317 importance of this role for giving patients a ‘lightbulb’ moment:  
6  
7

8 318

9  
10 319 *“It’s not until you take time and assess and explain how that [sensation] would be affecting*  
11  
12 320 *the motor problems, and it’s almost like a light bulb for people...they haven’t had the words*  
13  
14 321 *to articulate it”(Occupational therapist, Site 7)*  
15

16 322

17  
18 323 Others mentioned that it suited therapists that patients often didn’t understand sensation and  
19  
20 324 prioritise this because they did not know how to deliver somatosensory rehabilitation  
21  
22 325 anyway:  
23  
24

25 326

26  
27 327 *“I do find myself wondering whether it’s a bit of a chicken and the egg situation...it kind of*  
28  
29 328 *suits us that sensory stuff is down the bottom but I’m not sure how that goes. Have we*  
30  
31 329 *articulated that to the patients, to try to help them to understand, or is that an accurate*  
32  
33 330 *reflection of the patient’s experience?” (Occupational therapist, Site 8)*  
34  
35

36 331

37  
38 332 *Theme three: System pressures and resources*  
39

40 333

41  
42 334 This theme includes pressures experienced by therapists in their organisations, the lack of  
43  
44 335 resources to deliver somatosensory rehabilitation and sharing work responsibilities within a  
45  
46 336 rehabilitation team. Therapists described organisational factors that created competing  
47  
48 337 demands and reduced opportunities to provide somatosensory rehabilitation. There was  
49  
50 338 pressure, particularly on inpatient therapists, to facilitate discharge for patients and this was  
51  
52 339 perceived as highly valued by their organisation. This expectation often came at the expense  
53  
54 340 of providing upper limb somatosensory rehabilitation:  
55  
56

57 341  
58  
59  
60

1  
2  
3 342 “To facilitate someone to go home, or leaving the hospital is more highly valued [than  
4  
5 343 somatosensory rehabilitation]” (Occupational therapist, Site 7)  
6

7 344  
8  
9  
10 345 Community-based therapists were less affected by hospital discharge pressures but still  
11  
12 346 experienced competing demands related to their own, rather than organisational expectations:  
13

14 347  
15  
16 348 “I find I can’t really spend an hour just doing sensation...maybe half an hour doing sensation  
17  
18 349 and then all the return to work and everything else that’s going on, so...being able to dedicate  
19  
20 350 pure session for upper limb retraining is hard” (Occupational therapist, Site 1)  
21

22  
23 351

24  
25 352 Subtheme: Not having the right tools

26  
27 353 Lack of appropriate equipment to assess and treat somatosensory deficits was a common  
28  
29 354 barrier for therapists. Disorganised equipment and tools were observed by some as a  
30  
31 355 representation of time and effort placed on somatosensory rehabilitation to date:  
32

33  
34 356

35  
36 357 “We have bits and pieces, scraps of stuff that we kind of throw together and we haven’t got  
37  
38 358 any formal, really good quality assessments or treatments, you know just hobbled together  
39  
40 359 stuff...so it kind of reflects the importance or...how much time we put into it” (Occupational  
41  
42 360 therapist, Site 8)  
43

44  
45 361

46  
47 362 Therapists, however, anticipated that having the right equipment would improve their  
48  
49 363 practice and skill development, and improve their confidence in delivering somatosensory  
50  
51 364 rehabilitation:  
52

53  
54 365 “If you have the proper equipment, we will be more confident to use it and we’ll look more  
55  
56 366 professional too” (Occupational therapist, Site 7)  
57

58 367  
59  
60

1  
2  
3 368 Subtheme: Sharing or deferring professional roles  
4

5 369 Occupational therapists and physiotherapists spoke of overlapping professional responsibility  
6  
7  
8 370 in the delivery of somatosensory rehabilitation, and in some situations, sharing the workload.  
9  
10 371 More often, responsibility for upper limb somatosensory rehabilitation was assumed by the  
11  
12 372 occupational therapist. This role expectation was often related to physiotherapists' workload  
13  
14 373 and the need to delegate to focus on other rehabilitation areas:  
15  
16

17 374

18  
19 375 *"I'll be the first to admit if I've got an OT working with my client at the same time, then I*  
20  
21 376 *won't prioritise upper limb sensory"* (Physiotherapist, Site 6)  
22

23 377

24  
25 378 Phase 2: Analysis using implementation theory  
26

27  
28 379 An overview of coding to domains and categories of the TDF<sup>22</sup> and NPT<sup>23</sup> is provided in  
29  
30 380 Appendix 4.  
31

32 381

33  
34 382 *Analysis using The Theoretical Domains Framework*  
35

36  
37 383 The domains coded most frequently were Knowledge, Skills, Environmental context and  
38  
39 384 resources, Social professional role and identity, and Social influences.  
40

41 385

42 386 *Knowledge*  
43

44  
45 387 In alignment with thematic coding, lack of knowledge about somatosensory rehabilitation  
46  
47 388 was frequently coded as a barrier to evidence-based practice. Procedural knowledge, a  
48  
49 389 construct of the Knowledge domain, prompted coding of sources of knowledge. Therapists  
50  
51 390 felt that their university education had often left them unprepared to provide somatosensory  
52  
53 391 rehabilitation:  
54  
55

56 392

57  
58 393 *"When I went through university as well...I don't think it was an area that I believe was well*  
59  
60

1  
2  
3 394 *taught at that time...I didn't feel like I had a good grounding to even run with" (Occupational*  
4  
5 395 *therapist, Site 6)*  
6

7 396

8  
9 397 Opportunities for development of somatosensory knowledge in the workplace were also  
10  
11 398 scarce for some therapists, as were opportunities to acquire skills by observing or asking  
12  
13  
14 399 colleagues:  
15

16 400

17  
18 401 *"... it's (sensory rehabilitation) not something that you can learn off a colleague ....This is not*  
19  
20 402 *an area where I can ask one of my more experienced colleagues about, it's not something that*  
21  
22 403 *they would necessarily know" (Occupational therapist, Site 8)*  
23  
24

25 404

26  
27 405 The TDF Knowledge domain also highlighted what therapists knew about the impact of  
28  
29 406 somatosensory loss on patients, and gaps in therapist knowledge:  
30

31 407

32  
33  
34 408 *"... sometimes it's hard for us to understand the impact of sensory loss. Motor loss you can*  
35  
36 409 *see the impact...but if they have functional upper limb but sensation is the main issue, I don't*  
37  
38 410 *think we are as good at realising how much of an impact that could have" (Occupational*  
39  
40 411 *therapist, Site 5)*  
41

42 412

### 43 413 *Skills*

44  
45  
46 414 Coding to the Skills domain of the TDF highlighted a perceived skill gap and barrier to  
47  
48 415 evidence-based practice. The ability to develop and consolidate skills through exposure to  
49  
50 416 appropriate patients was seen as an enabler for sustaining skill levels:  
51

52 417

53  
54  
55 418 *"...and to consolidate early so then it becomes second nature rather than lose all the*  
56  
57 419 *knowledge that we've learnt" (Occupational therapist, Site 1)*  
58  
59  
60

1  
2  
3 420  
4  
5 421 Coding to this domain also highlighted the need for specialised skills when working with  
6  
7  
8 422 stroke survivors with common post-stroke deficits such as aphasia or cognitive impairment  
9  
10 423 who needed somatosensory rehabilitation:

11  
12 424  
13  
14 425 *“Clients that do have communication impairments is the other one...how do I get them to talk*  
15  
16 426 *this out?...in the past we’ve done some comparisons with things but if they don’t have the*  
17  
18 427 *language, I really don’t know what to do” (Occupational therapists, Site 8)*

19  
20 428  
21  
22  
23 429 *Environmental context and resources*

24  
25 430 Within this TDF domain, the constructs of environmental stressors, resources and person  
26  
27 431 versus environment interactions were most relevant. Environmental stressors were  
28  
29 432 recognised most by inpatient therapists and corresponded with findings in thematic coding  
30  
31 433 (see ‘*System pressures and resources*’). Resources referred to equipment and physical spaces  
32  
33 434 that were needed to deliver somatosensory rehabilitation, including quiet rooms to facilitate  
34  
35 435 sustained attention on assessments and therapy:

36  
37 436  
38  
39 437 *“To get to a private space or a quiet space to do the assessment or to have the equipment*  
40  
41 438 *somewhere easy in a quiet space, that might be a physical barrier” (Physiotherapist, Site 3)*

42  
43 439  
44  
45  
46 440 Theoretically, the workplace provided a supportive culture for evidence-based practice, but  
47  
48 441 practically, implementation was often left up to individual therapists:

49  
50 442  
51  
52  
53 443 *“Quite often it feels like it’s up to individual therapists to – which make sense – to bring on*  
54  
55 444 *change...but in order to do that ....requires a lot of ...energy and effort. And so the*  
56  
57 445 *organisation embraces it but not necessarily enables it to happen easily” (Occupational*  
58  
59  
60

1  
2  
3 446 *therapist, Site 6).*

4  
5 447

6  
7  
8 448 *Social professional role and identity*

9  
10 449 Therapists commented on two predominant areas within this TDF domain: their own  
11  
12 450 professional role and identity, and their organisation's identity or 'brand' and how these  
13  
14 451 factors influenced their perspective and practice. Physiotherapists mentioned that they would  
15  
16 452 often defer upper limb sensory rehabilitation to occupational therapists (as per thematic  
17  
18 453 coding, 'System pressures and resources', subtheme 'Sharing and deferring professional  
19  
20 454 roles'). Occupational therapists communicated that although upper limb sensory  
21  
22 455 rehabilitation was a part of their job and assumed expertise, it was not a role they were  
23  
24 456 always comfortable with:

25  
26 457

27  
28  
29  
30 458 *"In terms of the other disciplines, they look to us (OT) as an expert in this area, and there's a*  
31  
32 459 *very uncomfortable feeling" (Occupational therapist, Site 8)*

33  
34 460

35  
36  
37 461 Organisational identity was also mentioned as an enabler by therapists at sites which aspired  
38  
39 462 to high-quality healthcare, for example, through involvement in research and delivery of  
40  
41 463 evidence-based practice. Therapists felt that this quality 'brand' aligned with their own desire  
42  
43 464 to provide evidence-based stroke rehabilitation and justified their efforts to implement  
44  
45 465 somatosensory rehabilitation:

46  
47 466

48  
49  
50 467 *"We've got a very strong commitment to...using evidence-based practice, and keeping*  
51  
52 468 *abreast of new research and new techniques that are coming out" (Physiotherapist, Site 1)*

53  
54 469

55  
56  
57 470 *Social influences*

58  
59 471 Interpersonal processes had an impact on therapists' delivery of somatosensory rehabilitation.

60



1  
2  
3 472 This influence was exerted by work colleagues, either peers or managers, or patients.  
4  
5 473 Colleagues supported practice change. The intended team training was anticipated to be  
6  
7  
8 474 beneficial, in contrast to individuals attending a professional development training session  
9  
10 475 and trying to effect change:

11  
12 476

13  
14 477 *“It will be really helpful having so many therapists who actually know how to do it [sensory*  
15  
16 478 *rehabilitation]...we can spur each other on and to get each other to do it” (Occupational*  
17  
18 479 *therapist, Site 7)*

19  
20 480

21  
22  
23 481 Patients also influenced whether somatosensory rehabilitation was provided or not.

24  
25 482 Community-based therapists expressed that a precedent could be set when therapy was  
26  
27  
28 483 provided during inpatient rehabilitation. However, if somatosensory impairments were not  
29  
30 484 identified and/or treated there, patients may not want to focus on sensory rehabilitation:

31  
32 485

33  
34 486 *“What they’ve [patient] been focused on as an inpatient often comes with them... ‘I worked on*  
35  
36 487 *this while I was in hospital, I want to keep working on it’ ...so introducing those new things*  
37  
38 488 *[sensory rehabilitation] can also be a challenge” (Occupational therapist, Site 1)*

39  
40 489

41  
42  
43 490 Therapists found some patients were well-informed about treatment options and wanted to  
44  
45 491 pursue evidence-based rehabilitation:

46  
47 492

48  
49  
50 493 *“I’m finding that some patients are very savvy and have read up a lot about things and they*  
51  
52 494 *will actually say ‘Are you doing this treatment technique?’ ...I’ve had a couple of people*  
53  
54 495 *who...have asked for some of the sensory things” (Occupational therapist, Site 2)*

55  
56 496

57  
58 497 *Analysis using Normalisation Process Theory*

59  
60

1  
2  
3 498 Constructs most frequently used were Coherence, including Individual specification and  
4  
5 499 Internalisation, and Cognitive Participation, specifically the construct of Legitimation.  
6  
7  
8 500 Coherence refers to work done to make sense of using a new practice, whereas Cognitive  
9  
10 501 participation refers to relational work done to build enrolment and engagement in a new  
11  
12 502 practice.<sup>23</sup>  
13  
14  
15 503

16  
17 504 *Coherence: Individual Specification*

18  
19 505 Individual specification in this study related to therapists' understanding of their personal  
20  
21 506 roles and responsibilities related to evidence-based somatosensory rehabilitation. Therapists  
22  
23 507 were aware that they needed to move forward from previous practice patterns to incorporate  
24  
25 508 something new:  
26  
27  
28 509

30 510 *“Just breaking what’s old habits and changing practice and not defaulting to what’s easy*  
31  
32 511 *when we are feeling pressured and busy and tired...” (Occupational therapist, Site 1)*  
33  
34 512

35  
36  
37 513 Therapists also recognised their role in learning new skills related to equipment use and also  
38  
39 514 providing therapy that required a high level of mastery of therapy techniques:  
40  
41 515

42  
43 516 *“More just that translating that training [in sensory rehabilitation] to then mastering that skill*  
44  
45 517 *and remembering it” (Occupational therapist, Site 6)*  
46  
47 518

48  
49  
50 519 *Coherence: Internalisation*

51  
52 520 Internalisation in this study referred to therapists' understanding of the value and benefit of  
53  
54 521 using new evidence-based somatosensory rehabilitation approaches, and coming to a  
55  
56 522 conclusion about the practice.<sup>36</sup> Most therapists held positive views about the effectiveness of  
57  
58 523 the new approach and how it would add to their repertoire of skills:  
59  
60

1  
2  
3 524  
4  
5 525  
6  
7 526  
8  
9 527  
10  
11 528  
12  
13  
14 529  
15  
16 530  
17  
18 531  
19  
20 532  
21  
22 533  
23  
24 534  
25  
26  
27 535  
28  
29 536  
30  
31 537  
32  
33 538  
34  
35 539  
36  
37 540  
38  
39 541  
40  
41 542  
42  
43 543  
44  
45 544  
46  
47 545  
48  
49 546  
50  
51 547  
52  
53 548  
54  
55 549  
56  
57  
58  
59  
60

*“The impression that the treatment approach works so that is what I’m basing my enthusiasm on, that it is actually going to improve people’s sensation and translate into their function.”*

*(Occupational therapist, Site 2)*

Therapists at some sites observed colleagues using new somatosensory rehabilitation approaches, which contributed to conclusions drawn about the approach:

*“I can see the difference in the results as well that people who get SENSE training get”*

*(Occupational therapist, Site 7)*

#### *Cognitive Participation: Legitimation*

Legitimation in this study referred to therapists’ beliefs about whether or not it was appropriate for them to be involved with the new evidence-based sensory rehabilitation approach, in their particular context. Some therapists believed that the evidence base for somatosensory rehabilitation legitimised their future use of it, and helped support the anticipated time required to change practice:

*“Because there’s evidence behind this program already...there’s a bit more weight to it in terms of when you are selling it to other health professionals or to our clients and their families in terms of how much time is needed” (Occupational therapist, Site 5)*

Therapists from an inpatient setting wondered how their patients would participate in the therapy. Some believed this area of practice was more suitable for use by their community-based colleagues:

1  
2  
3 550 *“I’m not sure how well received the treatment would be with all of our patients”*

4  
5 551 *(Occupational therapist, Site 5)*

6  
7 552

8  
9 553 Some therapists felt that somatosensory rehabilitation was considered to be an assumed skill  
10  
11 554 by managers, which justified their involvement in, and use of the new rehabilitation  
12  
13  
14 555 approach:

15  
16 556

17  
18 557 *“I don’t necessarily think we would have...barriers put up by our direct managers....I think to*  
19  
20 558 *a degree they’d already expect us to be doing this as part of our jobs” (Occupational*  
21  
22 559 *therapist, Site 1)*

23  
24  
25 560

26  
27 561 The need for extensive one-to-one therapy as part of this new approach, which required  
28  
29 562 ‘hands-on’ intervention, was felt to be at odds with current practice at one site, and a potential  
30  
31 563 barrier to practice change, with therapists stating that:

32  
33 564 *“There is a move for...more self-directed [therapy]...the patient taking ownership of their*  
34  
35 565 *problem and working on that themselves, rather than you sitting down one-on-one”*  
36  
37 566 *(Physiotherapist, Site 3)*

38  
39  
40 567

41  
42 568 Finally, therapists talked about the importance of goal-directed rehabilitation and felt that  
43  
44 569 SENSE therapy was aligned with this principal:

45  
46 570

47  
48 571 *“It’s a goal-based service...the client has a lot of input into their...rehabilitation...by having*  
49  
50 572 *really specific goals. So it’s helpful that SENSE is very goal orientated as well.”*  
51  
52 573 *(Occupational therapist, Site 7)*

53  
54 574

55  
56 575

57  
58  
59  
60

1  
2  
3 576 **DISCUSSION**  
4

5 577 Findings suggest three main themes or factors influencing delivery of upper limb  
6  
7 somatosensory rehabilitation by occupational therapists' and physiotherapists': individual  
8 578 therapist factors (*'The uncertain unskilled therapist'*), patient factors (*'The patient's*  
9  
10 579 *understanding and priorities*) and organisational factors (*'System pressures and resources'*).  
11  
12 580  
13  
14 581 This study used a multi-phased approach for analysis, including both psychological and  
15  
16 582 sociological implementation theories. Initial inductive analysis allowed a data-driven  
17  
18 583 exploratory approach, before use of a deductive analysis, mapping data to pre-determined  
19  
20 584 theoretical constructs. Implementation theory highlighted key determinants of practice, such  
21  
22 585 as opportunities for practice to consolidate new skills (TDF domain 'Skills'), the anticipated  
23  
24 586 benefits of upskilling as a therapy team (TDF domain 'Social influence'), and the tendency of  
25  
26 587 physiotherapists to defer to occupational therapists for upper limb somatosensory  
27  
28 588 rehabilitation (TDF domain 'Social Professional role and identity'). NPT highlighted the  
29  
30 589 work anticipated and required by therapists, including the time and effort, to incorporate a  
31  
32 590 new approach into practice and learn practical aspects of equipment use. This phased  
33  
34 591 approach to analysis has previously been used in implementation research<sup>37</sup> and avoids  
35  
36 592 theoretical 'blindness' resulting from a single method.<sup>25</sup>  
37  
38 593  
39  
40 594 Given the known evidence-practice gaps in somatosensory rehabilitation,<sup>7,38</sup> it is  
41  
42 595 unsurprising that knowledge and skill barriers were prominent, consistent with previous  
43  
44 596 studies.<sup>19,39</sup> Patient factors were rightfully important to therapists. Therapists wanted to be  
45  
46 597 directed by patients about their stroke rehabilitation goals, but acknowledged that sensation  
47  
48 598 was a poorly understood, abstract concept for many patients. For that reason, patients often  
49  
50 599 did not raise sensation as an issue nor set 'sensory goals'. A cycle of patient non-inquiry and  
51  
52 600 therapist non-delivery of somatosensory rehabilitation was suggested, which may be  
53  
54  
55  
56  
57  
58  
59  
60

1  
2  
3 601 important to address during implementation. Interestingly, therapists sometimes delineated  
4  
5 602 between ‘sensory goals’ that were impairment based and ‘functional goals’ which were not,  
6  
7  
8 603 without noting the association between somatosensory capacities and occupational  
9  
10 604 performance.<sup>40,41</sup>

11  
12 605 The role of physiotherapists in somatosensory rehabilitation was also explored through this  
13  
14 606 research. Although the proportion of physiotherapists in the sample was relatively small  
15  
16  
17 607 (21%), one theme that was evident across several sites was that occupational therapists  
18  
19 608 assumed the primary role for upper limb somatosensory rehabilitation. This finding has  
20  
21 609 potential implications for involving physiotherapists in somatosensory rehabilitation.  
22  
23

24 610

25  
26 611 Organisational pressures were felt strongly by therapists. Inpatient occupational therapists  
27  
28 612 were particularly influenced by pressures to facilitate discharge and clear rehabilitation beds.  
29  
30 613 This pressure often compromised their ability to provide upper limb rehabilitation. Some  
31  
32  
33 614 therapists suggested that it might not be feasible for them to deliver somatosensory  
34  
35 615 rehabilitation in their inpatient setting. This finding is similar to other studies regarding  
36  
37 616 discharge pressures influencing provision of stroke rehabilitation therapies.<sup>42,43</sup> Social  
38  
39 617 influences from colleagues and patients were identified as both enabling and hindering  
40  
41 618 factors for change. Therapists held positive views about anticipated implementation efforts  
42  
43  
44 619 that would be directed towards them as a group rather than individuals. They perceived  
45  
46 620 benefits of upskilling the whole therapy team and working together to use a new therapy  
47  
48  
49 621 approach.

50  
51 622

52  
53  
54 623 Implementation theory helped to further elucidate perceptions towards changing practice and  
55  
56 624 factors influencing translation. Mapping to domains of the TDF and NPT revealed common  
57  
58 625 data points for triangulation, a layered understanding of themes, and new factors influencing  
59  
60

1  
2  
3 626 the implementation of evidence-based somatosensory rehabilitation not apparent during  
4  
5 627 initial coding. An example of intersection between theoretical approaches used in this study  
6  
7 628 was between the NPT category of '*Coherence: Internalisation*' and the TDF domain of  
8  
9 629 '*Beliefs about consequences*'. Therapists' positive views towards the new somatosensory  
10  
11 630 intervention and its effectiveness were mapped to both these components. Similarly, the TDF  
12  
13 631 domain of '*Social Professional Role and Identity*' was found to align with the NPT category  
14  
15 632 of '*Cognitive Participation: Legitimation*' in therapists' belief the intervention may be more  
16  
17 633 suitable for community-based therapists.  
18  
19  
20  
21 634 Two other studies have used both the TDF and NPT to explore implementation issues <sup>44,45</sup>  
22  
23 635 and multiple studies have applied more than one implementation theory.<sup>46</sup> This study  
24  
25 636 mapped data to implementation theory, improving our understanding of factors which  
26  
27 637 influence practice change, such as professional identity and work anticipated by therapists to  
28  
29 638 embed a new therapy.  
30  
31  
32

### 33 639 34 35 640 **Strengths and limitations**

36  
37 641 There were several strengths of the study design and methods. First, the use of multi-phased  
38  
39 642 analysis and implementation theory can heighten the sensitivity of researchers to  
40  
41 643 interpretations that may not occur using inductive analysis alone<sup>34</sup>. Second, the number of  
42  
43 644 health professionals (n=87) across eight different health organisations provided a  
44  
45 645 representative sample of stroke rehabilitation therapists. Therapists unable to attend initial  
46  
47 646 focus groups were followed up in small group interviews, allowing part-time therapists, and  
48  
49 647 those in senior roles with family/carer responsibilities to participate. Their perspectives were  
50  
51 648 valued. Limitations of this study include the fact that participating health organisations were  
52  
53 649 largely selected by the research team. Furthermore, management personnel within these  
54  
55 650 organisations may have influenced which therapists participated in the study. These factors  
56  
57  
58  
59  
60

1  
2  
3 651 may have introduced sampling bias and influenced findings. In addition, therapists with  
4  
5 652 different levels of experience and professional grades participated in the interviews,  
6  
7 653 introducing a possible power differential within the group, and potential response bias.  
8  
9  
10 654  
11  
12 655

## 14 656 **Conclusions**

16  
17 657 This study used focus groups to explore the perspectives of occupational therapists and  
18  
19 658 physiotherapists and found individual, patient and organisational factors influence the  
20  
21 659 delivery of evidence-based somatosensory rehabilitation with stroke survivors. Therapists  
22  
23 660 experience barriers to change including a lack of knowledge and skills, lack of resources and  
24  
25 661 organisational pressures. Facilitators for change were identified, including social support and  
26  
27 662 therapists' perceived legitimacy in using new somatosensory rehabilitation approaches. The  
28  
29 663 theoretical lens used in this study will guide implementation during the SENSE Implement  
30  
31 664 study, a project aimed at implementing an evidence-based sensory discrimination program.<sup>14</sup>  
32  
33  
34  
35  
36  
37  
38  
39  
40  
41  
42  
43  
44  
45  
46  
47  
48  
49  
50  
51  
52  
53  
54  
55  
56  
57  
58  
59  
60



1  
2  
3 **666 Ethics Committees approval:**  
4

5 667 Ethical approval for this study was granted by the Austin Health Human Research  
6  
7  
8 668 Ethics Committee (Reference: H2013/04956 HREC/13/Austin/8) and La Trobe University  
9  
10 669 (Reference FHEC 14/243). Site specific ethics approval was obtained for all participating  
11  
12 670 sites.  
13

14  
15 671

16  
17 **672 Acknowledgements:**  
18

19 673 We acknowledge and thank the busy occupational therapists and physiotherapists who  
20  
21 674 participated in this study.  
22  
23

24 675

25  
26 **676 Funding:**  
27

28 677 We acknowledge support for conduct of the research from the National Health and Medical  
29  
30 678 Research Council (NHMRC) of Australia partnership grant: A network of sites and ‘up-  
31  
32 679 skilled’ therapists to deliver best practice stroke rehabilitation of the upper limb (GNT  
33  
34 680 1134495). LSC was supported by an Australian Government Research Training Program  
35  
36 681 Scholarship. NAL was supported by a Future Leader Fellowship (102055) from the National  
37  
38 682 Heart Foundation of Australia. DAO is supported by a NHMRC Translating Research into  
39  
40 683 Practice Fellowship (GNT 1168749).  
41  
42  
43  
44  
45  
46  
47  
48

49 684

50 685

51 **686 Competing interests:**  
52

53 687 LMC is the lead originator of the SENSE approach to sensory rehabilitation, the focus of  
54  
55 688 knowledge translation in The SENSE Implement project. A SENSE training package (manual  
56  
57 689 and DVD) has been developed and is available for purchase. SENSE assessment and training  
58  
59 690 equipment are also available for purchase. LMC has no personal financial interest in the sale  
60

1  
2  
3 691 of these resources. There is no patent, or intended application for a patent, associated with  
4  
5 692 these resources. LMC has conducted workshops on the SENSE approach and been invited to  
6  
7  
8 693 give lectures and conference presentations on the approach. All other authors declare that  
9  
10 694 they have no competing interests.  
11

12 695

14 696 **Author statement:**

16 697 LSC, LC and NAL conceptualised the study. LSC and YMY conducted focus group, small  
18 698 group and individual interviews. LSC, LC, NAL, DAO and AM discussed and determined  
20 699 the approach to deductive analysis using implementation theory. LSC and AM were involved  
22 700 in thematic analysis. LSC, NAL and AM were involved in deductive analysis. LSC and NAL  
24 701 drafted the manuscript; all authors critically reviewed the manuscript and provided feedback.  
26  
27  
28  
29  
30  
31 703  
32 704

## 705 REFERENCES

- 706
- 707 1. Carey LM, Matyas TA. Frequency of discriminative sensory loss in the hand after  
708 stroke in a rehabilitation setting. *J Rehabil Med.* 2011;43(3):257-63.
- 709 2. Connell LA, Lincoln NB, Radford KA. Somatosensory impairment after stroke:  
710 Frequency of different deficits and their recovery. *Clin Rehabil.* 2008;22(8):758-67.
- 711 3. Kessner SS, Schlemm E, Cheng B, et al. Somatosensory Deficits After Ischemic  
712 Stroke. *Stroke.* 2019;50(5):1116-23.
- 713 4. Kim JS, & Choi-Kwon, S. Discriminative sensory dysfunction after unilateral stroke.  
714 *Stroke* 27(4):677-82.
- 715 5. Kalra L. Stroke rehabilitation 2009: Old chestnuts and new insights. *Stroke*  
716 2010;41(2):e88-e90.
- 717 6. Sullivan JE, Hedman LD. Sensory dysfunction following stroke: incidence,  
718 significance, examination, and intervention. *Top Stroke Rehabil.* 2008;15(3):200-17.
- 719 7. Pumpa LU, Cahill LS, Carey LM. Somatosensory assessment and treatment after  
720 stroke: An evidence-practice gap. *Aust Occup Ther J.* 2015;62(2):93-104.
- 721 8. National Stroke Foundation. National Stroke Audit: Rehabilitation Services Report  
722 2018. Stroke Foundation Published 2018. Available from:  
723 <https://informme.org.au/stroke-data/Acute-audits> .
- 724 9. Winward CE, Halligan PW, Wade DT. Current practice and clinical relevance of  
725 somatosensory assessment after stroke. *Clin Rehabil.* 1999;13(1):48-55.
- 726 10. Carlsson H, Gard G, BrogÅRdh C. Upper-limb sensory impairments after stroke:  
727 Self-reported experiences of daily life and rehabilitation *J Rehabil Medicine*  
728 2018;50(1):45-51.
- 729 11. Connell LA, McMahon NE, Adams N. Stroke survivors' experiences of  
730 somatosensory impairment after stroke: An Interpretative Phenomenological  
731 Analysis. *Physiotherapy.* 2014;100(2):150-55.
- 732 12. Doyle SD, Bennett S, Dudgeon B. Upper limb post-stroke sensory impairments: The  
733 survivor's experience. *Disabil Rehabil.* 2014;36(12):993-1000.
- 734 13. Doyle S, Bennett S, Fasoli SE et al. Interventions for sensory impairment in the upper  
735 limb after stroke. *Cochrane Database Syst Rev.* 2010;6.
- 736 14. Carey L, Macdonell R, Matyas TA. SENSE: Study of the Effectiveness of  
737 Neurorehabilitation on Sensation: a randomized controlled trial. *Neurorehabil Neural*  
738 *Repair.* 2011;25(4):304-313.
- 739 15. Turville ML, Cahill LS, Matyas TA et al. The effectiveness of somatosensory  
740 retraining for improving sensory function in the arm following stroke: a systematic  
741 review. *Clin Rehabil.* 2019;33(5):834-46.
- 742 16. Canadian Stroke Best Practices. Recommendations: Rehabilitation and recovery  
743 following stroke. 6th ed. Retrieved from <https://www.strokebestpractices.ca/> 2019.
- 744 17. Intercollegiate Stroke Working Party. Stroke guidelines 5th ed. 2016. Available from  
745 <https://www.rcplondon.ac.uk/guidelines-policy/stroke-guidelines>.
- 746 18. Stroke Foundation. Clinical guidelines for stroke management (Living guidelines).  
747 Stroke Foundation. 2020. Available from: [https://strokefoundation.org.au/What-we-](https://strokefoundation.org.au/What-we-do/Treatment-programs/Clinical-guidelines)  
748 [do/Treatment-programs/Clinical-guidelines](https://strokefoundation.org.au/What-we-do/Treatment-programs/Clinical-guidelines).
- 749 19. Doyle SD, Bennett S, Dudgeon BJ. Sensory impairment after stroke: Exploring  
750 therapists' clinical decision making. *Can J Occup Ther.* 2014;81(4):215-25.
- 751 20. Bayley MT, Hurdowar A, Richards CL, et al. Barriers to implementation of stroke  
752 rehabilitation evidence: findings from a multi-site pilot project. *Disabil Rehabil.*  
753 2012;34(19):1633-38.

- 1  
2  
3 754 21. Doyle S, Bennett S, Gustafsson L. Clinical decision making when addressing upper  
4 755 limb post-stroke sensory impairments. *Br J Occup Ther.* 2013;76(6):254-63.
- 5 756 22. Cane J, O'Connor D, Michie S. Validation of the theoretical domains framework for  
6 757 use in behaviour change and implementation research. *Imp Sci.* 2012;7(1):37.
- 7 758 23. May C, Finch T. Implementing, embedding, and integrating practices: An outline of  
8 759 normalization process theory. *Sociology.* 2009;43(3):535-54.
- 9 760 24. Bauer MS, Damschroder L, Hagedorn, H, et al.. An introduction to implementation  
10 761 science for the non-specialist. *BMC Psychol.* 2015;3(1):32.
- 11 762 25. Nilsen P. Making sense of implementation theories, models and frameworks. *Imp Sci.*  
12 763 2015;10(1):53.
- 13 764 26. Eccles M at al. Designing theoretically-informed implementation interventions. *Imp*  
14 765 *Sci.* 2006;1(1):4.
- 15 766 27. Kislov R, Pope C, Martin GP et al. Harnessing the power of theorising in  
16 767 implementation science. *Imp Sci.* 2019;14(1):103.
- 17 768 28. McEvoy R, Ballini, L., Maltoni, S et al. A qualitative systematic review of studies  
18 769 using the normalization process theory to research implementation processes. *Imp Sci*  
19 770 2014;9(2).
- 20 771 29. Doyle SD, Bennett S. Feasibility and effect of a professional education workshop for  
21 772 occupational therapists' management of upper-limb poststroke sensory impairment.  
22 773 *Am J Occup Ther.* 2014;68(3):e74-e83.
- 23 774 30. Cahill LS, Lannin, NA, Mak-Yuen Y et al. Changing practice in the assessment and  
24 775 treatment of somatosensory loss in stroke survivors: Protocol for a knowledge  
25 776 translation study. *BMC Health Serv Res.* 2018;18(1):34.
- 26 777 31. Hamilton AB, Finley EP. Qualitative methods in implementation research: An  
27 778 introduction. *Psychiatry Res.* 2019;280:112516.
- 28 779 32. Braun V, Clarke V. Using thematic analysis in psychology. *Qual Res in Psychol.*  
29 780 2006;3(2):77-101.
- 30 781 33. Terry G, Hayfield N, Clarke V et al. Thematic analysis. *The Sage handbook of*  
31 782 *qualitative research in psychology.* 2017:17-37.
- 32 783 34. MacFarlane A, O'Reilly-de Brún M. Using a theory-driven conceptual framework in  
33 784 qualitative health research. *Qual Health Res.* 2012;22(5):607-18.
- 34 785 35. May C, Finch, T. & Rapley, T. Normalisation Process Theory. In: Nilsen P., ed.  
35 786 *International Handbook of Implementation Science.* London: Edward Elgar 2020.
- 36 787 36. McNaughton RJ, Steven A, Shucksmith J. Using Normalization Process Theory as a  
37 788 Practical Tool Across the Life Course of a Qualitative Research Project. *Qual Health*  
38 789 *Res.* 2020;30(2):217-27.
- 39 790 37. Sandström B, Willman A, Svensson B et al. Perceptions of national guidelines and  
40 791 their (non) implementation in mental healthcare: a deductive and inductive content  
41 792 analysis. *Imp Sci.* 2015;10(1):43.
- 42 793 38. Doyle S, Bennett S, Gustafsson L. Occupational therapy for upper limb post-stroke  
43 794 sensory impairments: a survey. *Br J Occup Ther.* 2013;76(10):434-42.
- 44 795 39. McCluskey A, Vratisistas-Curto A, Schurr K. Barriers and enablers to implementing  
45 796 multiple stroke guideline recommendations: a qualitative study. *BMC Health Serv*  
46 797 *Res.* 2013;13:323.
- 47 798 40. Meyer S, Karttunen AH, Thijs V, et al. How do somatosensory deficits in the arm and  
48 799 hand relate to upper limb impairment, activity, and participation problems after  
49 800 atroke? A systematic review. *Phys Ther.* 2014;94(9):1220-1231.
- 50 801 41. Carey LM, Lamp G, Turville, M. The state-of-the-science on somatosensory function  
51 802 and its impact on daily life in adults and older adults, and following stroke: a scoping  
52 803 review. *OTJR: Occupation, Participation and Health.* 2016;36:27S-41S.

1  
2  
3  
4  
5  
6  
7  
8  
9  
10  
11  
12  
13  
14  
15  
16  
17  
18  
19  
20  
21  
22  
23  
24  
25  
26  
27  
28  
29  
30  
31  
32  
33  
34  
35  
36  
37  
38  
39  
40  
41  
42  
43  
44  
45  
46  
47  
48  
49  
50  
51  
52  
53  
54  
55  
56  
57  
58  
59  
60

- 804 42. Jolliffe L, Hoffmann T, Lannin NA. Increasing the uptake of stroke upper limb  
805 guideline recommendations with occupational therapists and physiotherapists. A  
806 qualitative study using the Theoretical Domains Framework. *Aust Occup Ther J.*  
807 2019;66(5):603-16.
- 808 43. Nelson ML, Hanna E, Hall S, Calvert M. What makes stroke rehabilitation patients  
809 complex? Clinician perspectives and the role of discharge pressure. *J of Comorbid.*  
810 2016;6(2):35-41.
- 811 44. Currie K, King C, McAloney-Kocaman K, et al. Barriers and enablers to meticillin-  
812 resistant Staphylococcus aureus admission screening in hospitals: A mixed-methods  
813 study. *J Hosp Infect.* 2019;101(1):100-108.
- 814 45. Al Shemeili S, Klein S, Strath A, Fares S et al. An exploration of health professionals'  
815 experiences of medicines management in elderly, hospitalised patients in Abu Dhabi.  
816 *Int J Clin Pharm.* 2016;38(1):107-118.
- 817 46. Birken SA, Powell BJ, Pesseau J, Kirk MA et al. Combined use of the Consolidated  
818 Framework for Implementation Research (CFIR) and the Theoretical Domains  
819 Framework (TDF): A systematic review. *Imp Sci.* 2017;12(1):2.
- 820

## Appendix 1.

### *Focus group questions*

#### Questions used in focus groups and small group interviews

1. *How able do you feel currently to change your practice regarding sensory assessment and treatment?*
2. *What do you think some of the challenges will be in using new assessment and treatment approaches?*
3. *What do you see as some of the strengths of this organisation in supporting your use of new sensory assessments and treatments?*
4. *How do you feel about the prospect of changing the way you assess and treat sensory loss?*
5. *Do you think the working environment (i.e. either cultural / physical) will impact on your ability to use new assessment and treatment approaches?*
6. *What are the incentives for you currently, if any, to change your practice in the areas of sensory rehabilitation?*
7. *Do you think a change in practice in the area of sensory assessment and treatment will have a positive effect on patient outcomes?*

## Appendix 2.

Study: Factors influencing allied health professionals' implementation of upper limb sensory rehabilitation for stroke survivors: A qualitative study to inform knowledge translation

### Theoretical Domains Framework (TDF) Codebook

Note:

Sensory rehabilitation refers to both assessment and treatment of sensation, in this case using SENSE Assess and SENSE therapy

| TDF Domain                                                                                                                                                                                                                    | Construct                                                                                                                                                                                                                                                                                                                           | Guidance/rule                                                                                                                                                                                                                                                                                                                                                                                                                                                                                                                                                                                                                                                                                                   | Sample quotes                                                                                                                                                                                                                                                                                                                                                                                                                                                                                                                                                                                                               |
|-------------------------------------------------------------------------------------------------------------------------------------------------------------------------------------------------------------------------------|-------------------------------------------------------------------------------------------------------------------------------------------------------------------------------------------------------------------------------------------------------------------------------------------------------------------------------------|-----------------------------------------------------------------------------------------------------------------------------------------------------------------------------------------------------------------------------------------------------------------------------------------------------------------------------------------------------------------------------------------------------------------------------------------------------------------------------------------------------------------------------------------------------------------------------------------------------------------------------------------------------------------------------------------------------------------|-----------------------------------------------------------------------------------------------------------------------------------------------------------------------------------------------------------------------------------------------------------------------------------------------------------------------------------------------------------------------------------------------------------------------------------------------------------------------------------------------------------------------------------------------------------------------------------------------------------------------------|
| <b>1. Knowledge</b><br><br>An awareness of the existence of something<br><br><i>What do they know and how does that influence what they do?*</i><br><br><i>Whether the therapist has knowledge of sensory rehabilitation#</i> | <u>Knowledge</u> (including knowledge of condition/scientific rationale): <i>An awareness of the existence of something</i><br><br><u>Procedural knowledge</u> : <i>Knowing how to do something</i><br><br><u>Knowledge of task environment</u> : <i>Knowledge of the social and material context in which a task is undertaken</i> | Appropriate coding to this domain:<br><br>Knowledge/Lack of knowledge of: <ul style="list-style-type: none"> <li>▪ Nature of post-stroke sensory loss</li> <li>▪ Scientific rationale for sensory rehabilitation</li> <li>▪ Clinical practice guidelines</li> <li>▪ Sensory assessment and treatment approaches</li> <li>▪ Procedure of sensory rehabilitation</li> <li>▪ Equipment and materials needed</li> <li>▪ Anecdotal evidence related to sensory rehabilitation</li> </ul> Inappropriate coding to this domain: <ul style="list-style-type: none"> <li>▪ The active 'doing' of rehabilitation (code to Skills)</li> <li>▪ Discussion of who provides sensory rehabilitation (code to Social</li> </ul> | <i>"you educate the patients on you know, safety awareness between hot cold and sharp objects and what not, but in terms of rehabilitation...I'm just not aware of what to do" (Z1_P6)</i><br><br><i>"I barely remember even covering sensation at uni" (O5_P3)</i><br><br><i>"...they [sensory assessments] were all listed and I'm thinking I don't know them...from years of experience, I didn't know any of them.....that was disconcerting" (C2_P10) [Construct: Knowledge]</i><br><br><i>"I just do things but I don't know what principles they fall under and things like that, so... I was a bit overwhelmed"</i> |



|                                                                         |                                                                                                                                                                                                                                                                                                                                                                                                                                                                                                                                                                                                                                                                                                                                                                                                                                                                                                                                                                                                                                             |                                                                                                                                                                                                                                                                                                                                                                                                                                                                                                                                                                                                                            |                                                                                                                                                                                                                                                                                                                                                                                                                                                                                                                                                                                                                                                                                                                                                                                                                               |
|-------------------------------------------------------------------------|---------------------------------------------------------------------------------------------------------------------------------------------------------------------------------------------------------------------------------------------------------------------------------------------------------------------------------------------------------------------------------------------------------------------------------------------------------------------------------------------------------------------------------------------------------------------------------------------------------------------------------------------------------------------------------------------------------------------------------------------------------------------------------------------------------------------------------------------------------------------------------------------------------------------------------------------------------------------------------------------------------------------------------------------|----------------------------------------------------------------------------------------------------------------------------------------------------------------------------------------------------------------------------------------------------------------------------------------------------------------------------------------------------------------------------------------------------------------------------------------------------------------------------------------------------------------------------------------------------------------------------------------------------------------------------|-------------------------------------------------------------------------------------------------------------------------------------------------------------------------------------------------------------------------------------------------------------------------------------------------------------------------------------------------------------------------------------------------------------------------------------------------------------------------------------------------------------------------------------------------------------------------------------------------------------------------------------------------------------------------------------------------------------------------------------------------------------------------------------------------------------------------------|
|                                                                         |                                                                                                                                                                                                                                                                                                                                                                                                                                                                                                                                                                                                                                                                                                                                                                                                                                                                                                                                                                                                                                             | Professional Role and Identity) <ul style="list-style-type: none"> <li>▪ Therapist report of patient knowledge regarding sensation</li> </ul>                                                                                                                                                                                                                                                                                                                                                                                                                                                                              | (H4_P5) [Construct: Procedural Knowledge]                                                                                                                                                                                                                                                                                                                                                                                                                                                                                                                                                                                                                                                                                                                                                                                     |
| <b>2. Skills</b><br>An ability or proficiency acquired through practice | <p><u>Skills development:</u> <i>The gradual acquisition or advancement through progressive stages of an ability or proficiency acquired through training and practice</i></p> <p><u>Competence:</u> <i>One's repertoire of skills, and ability especially as it is applied to a task or set of tasks</i></p> <p><u>Ability:</u> <i>Competence or capacity to perform a physical or mental act. Ability may be either unlearned or acquired by education and practice</i></p> <p><u>Interpersonal skills:</u> <i>An aptitude enabling a person to carry on effective relationships with others, such as an ability to cooperate, to assume appropriate social responsibilities or to exhibit adequate flexibility</i></p> <p><u>Practice:</u> <i>Repetition of an act, behaviour, or series of activities, often to improve performance or acquire a skill</i></p> <p><u>Skills assessment:</u> <i>A judgment of the quality, worth, importance. Level or value of an ability or proficiency acquired through training and practice</i></p> | <p>Appropriate coding to this domain:</p> <ul style="list-style-type: none"> <li>▪ Development of sensory rehabilitation skills</li> <li>▪ Competence and ability in sensory rehabilitation</li> <li>▪ Practice of sensory rehabilitation skills</li> <li>▪ Evaluation of quality of sensory rehabilitation practices</li> <li>▪ Discussion of how relationship/rapport between therapist and patient may promote use of sensory rehabilitation</li> </ul> <p>Inappropriate coding to this domain:</p> <ul style="list-style-type: none"> <li>▪ How therapists feel about current skill level (Code to Emotion)</li> </ul> | <p><i>"So it's not just necessarily about the knowing it's I think sometimes more about the doing....that's sometimes the hard part."</i> (Y8_P1)</p> <p><i>"I also had a young patient recently who...his only issue was sensation, decreased sensation in his hand and I really didn't feel like I had the skills to know where to go in my specific intervention"</i> (Y8_P3)</p> <p><i>"I'm not very skilled in that area [sensory rehabilitation] either. So I probably avoid it."</i> (Z11_P1)</p> <p><i>"I think it's that carry over, you kind of get that feeling that you need to be doing it really regularly to be able to keep those skills up-to-date"</i> (W13_P4) [Construct: Practice]</p> <p><i>"I'm probably a bit slap-dash in my approach to sensory assessments (L9_P6) [Construct: Competence]</i></p> |



1  
2  
3  
4  
5  
6  
7  
8  
9  
10  
11  
12  
13  
14  
15  
16  
17  
18  
19  
20  
21  
22  
23  
24  
25  
26  
27  
28  
29  
30  
31  
32  
33  
34  
35  
36  
37  
38  
39  
40  
41  
42  
43  
44  
45  
46

|                                                                                                                                                                                                                                                                                                           |                                                                                                                                                                                                                                                                                                                                                                                                                                                                                                                                                                                                                                                                                                                                                                                                                                                                                                                                                                                                                                                                                                                                                                                                                                                  |                                                                                                                                                                                                                                                                                                                                                                                                                                                                          |                                                                                                                                                                                                                                                                                                                                                                                                                                                                                                         |
|-----------------------------------------------------------------------------------------------------------------------------------------------------------------------------------------------------------------------------------------------------------------------------------------------------------|--------------------------------------------------------------------------------------------------------------------------------------------------------------------------------------------------------------------------------------------------------------------------------------------------------------------------------------------------------------------------------------------------------------------------------------------------------------------------------------------------------------------------------------------------------------------------------------------------------------------------------------------------------------------------------------------------------------------------------------------------------------------------------------------------------------------------------------------------------------------------------------------------------------------------------------------------------------------------------------------------------------------------------------------------------------------------------------------------------------------------------------------------------------------------------------------------------------------------------------------------|--------------------------------------------------------------------------------------------------------------------------------------------------------------------------------------------------------------------------------------------------------------------------------------------------------------------------------------------------------------------------------------------------------------------------------------------------------------------------|---------------------------------------------------------------------------------------------------------------------------------------------------------------------------------------------------------------------------------------------------------------------------------------------------------------------------------------------------------------------------------------------------------------------------------------------------------------------------------------------------------|
| <p>3. <b>Social/professional role and identity</b></p> <p>A coherent set of behaviours and displayed personal qualities of an individual in a social or work setting</p> <p><i>How does who they are as an occupational therapist or physiotherapist influence whether they do something or not?*</i></p> | <p><u>Professional identity:</u> <i>The characteristics by which an individual is recognised relating to, connected with or befitting a particular profession</i></p> <p><u>Professional role:</u> <i>The behaviour considered appropriate for a particular kind of work or social position</i></p> <p><u>Social identity:</u> <i>The set of behavioural or personal characteristics by which an individual is recognizable [and portrays] as a member of a social group</i></p> <p><u>Identity:</u> <i>An individual's sense of self defined by a) a set of physical and psychological characteristics that is not wholly shared with any other person and b) a range of social and interpersonal affiliations (e.g., ethnicity) and social roles.</i></p> <p><u>Professional boundaries:</u> <i>The bounds or limits relating to, or connected with a particular profession or calling</i></p> <p><u>Professional confidence:</u> <i>an individual's belief in his or her repertoire of skills and ability especially as it is applied to a task or set of tasks.</i></p> <p><u>Group identity:</u> <i>the set of behavioural or personal characteristics by which an individual is recognizable [and portrays] as a member of a group</i></p> | <p>Appropriate coding to this domain:</p> <ul style="list-style-type: none"> <li>▪ Who provides sensory rehabilitation</li> <li>▪ Link between profession and tasks of sensory rehabilitation</li> <li>▪ Boundaries between therapists in providing sensory rehabilitation</li> <li>▪ Organisational commitment</li> </ul> <p>Identity could also relate to the identity of the organisation (i.e. a health service having a reputation of 'world-class healthcare')</p> | <p><i>"if there's an OT involved we would deflect that as an OT thing as opposed to what we would do"</i> (C2_P4) [Construct: Professional boundaries]</p> <p><i>"And I'll be the first to admit if I've got an OT working with my client at the same time then I won't prioritise upper limb sensory"</i> (L9_P6)</p> <p><i>"in terms of the other disciplines, they look to us (OT) as an expert in this area, and there's a very uncomfortable feeling"</i> (Y3_P6) [Construct: Social Identity]</p> |
|-----------------------------------------------------------------------------------------------------------------------------------------------------------------------------------------------------------------------------------------------------------------------------------------------------------|--------------------------------------------------------------------------------------------------------------------------------------------------------------------------------------------------------------------------------------------------------------------------------------------------------------------------------------------------------------------------------------------------------------------------------------------------------------------------------------------------------------------------------------------------------------------------------------------------------------------------------------------------------------------------------------------------------------------------------------------------------------------------------------------------------------------------------------------------------------------------------------------------------------------------------------------------------------------------------------------------------------------------------------------------------------------------------------------------------------------------------------------------------------------------------------------------------------------------------------------------|--------------------------------------------------------------------------------------------------------------------------------------------------------------------------------------------------------------------------------------------------------------------------------------------------------------------------------------------------------------------------------------------------------------------------------------------------------------------------|---------------------------------------------------------------------------------------------------------------------------------------------------------------------------------------------------------------------------------------------------------------------------------------------------------------------------------------------------------------------------------------------------------------------------------------------------------------------------------------------------------|

|                                                                                                                                                                                                                                                                                                                                                                       |                                                                                                                                                                                                                                                                                                                                                                                                                                                                                                                                                                                                                                                                                                                                                                                                                                                                              |                                                                                                                                                                                                                                                                                                                                                                                                                                                                                                                                                                                                                                                                      |                                                                                                                                                                                                                                                                                                                                                                                                                                                                                                                                                                                                                                                                                                                                                                        |
|-----------------------------------------------------------------------------------------------------------------------------------------------------------------------------------------------------------------------------------------------------------------------------------------------------------------------------------------------------------------------|------------------------------------------------------------------------------------------------------------------------------------------------------------------------------------------------------------------------------------------------------------------------------------------------------------------------------------------------------------------------------------------------------------------------------------------------------------------------------------------------------------------------------------------------------------------------------------------------------------------------------------------------------------------------------------------------------------------------------------------------------------------------------------------------------------------------------------------------------------------------------|----------------------------------------------------------------------------------------------------------------------------------------------------------------------------------------------------------------------------------------------------------------------------------------------------------------------------------------------------------------------------------------------------------------------------------------------------------------------------------------------------------------------------------------------------------------------------------------------------------------------------------------------------------------------|------------------------------------------------------------------------------------------------------------------------------------------------------------------------------------------------------------------------------------------------------------------------------------------------------------------------------------------------------------------------------------------------------------------------------------------------------------------------------------------------------------------------------------------------------------------------------------------------------------------------------------------------------------------------------------------------------------------------------------------------------------------------|
|                                                                                                                                                                                                                                                                                                                                                                       | <p><u>Leadership</u>: <i>The processes involved in leading others, including organising, directing, coordinating and motivating their efforts toward achievement of certain group or organization goals</i></p> <p><u>Organizational commitment</u>: <i>An employee's dedication to an organisation and wish to remain part of it.</i></p>                                                                                                                                                                                                                                                                                                                                                                                                                                                                                                                                   |                                                                                                                                                                                                                                                                                                                                                                                                                                                                                                                                                                                                                                                                      |                                                                                                                                                                                                                                                                                                                                                                                                                                                                                                                                                                                                                                                                                                                                                                        |
| <p><b>4. Beliefs about capabilities</b></p> <p>Acceptance of the truth, reality or validity about an ability, talent or facility that a person can put to constructive use</p> <p><i>Do they think they can do what they should do and how does that influence whether they do it or not?*</i></p> <p><i>The extent to which the therapist feels confident/in</i></p> | <p><u>Self-confidence</u>: <i>Self-assurance or trust in one's own abilities, capabilities and judgement</i></p> <p><u>Perceived competence</u>: <i>An individual's belief in their ability to learn and execute skills</i></p> <p><u>Self-efficacy</u>: <i>An individual's capacity to act effectively to bring about desired results, as perceived by the individual</i></p> <p><u>Perceived behavioural control</u>: <i>an individual's perception of the ease or difficulty of performing the behaviour of interest</i></p> <p><u>Beliefs</u>: <i>The thing believed; the proposition/set of propositions held true</i></p> <p><u>Self-esteem</u>: <i>The degree to which the qualities and characteristics contained in one's self-concept are perceived to be positive</i></p> <p><u>Empowerment</u>: <i>The promotion of the skills, knowledge and confidence</i></p> | <p>Appropriate coding to this domain:</p> <ul style="list-style-type: none"> <li>▪ Perceived behavioural control in delivery of sensory rehabilitation</li> <li>▪ Therapist confidence in delivering sensory rehabilitation</li> <li>▪ How easy or difficult therapists view delivery of sensory rehabilitation</li> <li>▪ Self-efficacy and beliefs regarding sensory rehabilitation</li> </ul> <p>Inappropriate coding to this domain:</p> <ul style="list-style-type: none"> <li>▪ Active delivery of sensory rehabilitation (code to Skills)</li> <li>▪ Expectations of outcomes of using sensory rehabilitation (code to Beliefs about consequences)</li> </ul> | <p><i>"there's a bit of trepidation around...needing to achieve a certain standard and being able to use a new tool and being able to... do it correctly" (Z1_P3)</i></p> <p><i>"And just your general confidence in yourself and...you're in the middle of a session and you're thinking I feel confident and competent in this skill...it's less stressful to approach that client with that issue" (W7_P4)</i></p> <p><i>"I'm coming into this thinking, you know this is really good, and it's obviously evidence based practice but can I provide this? Like there's this guilt that, you know, this is best care, this is what I should be doing with my patients but I don't have capacity for that" (O5_P4) [Construct: perceived behavioural control]</i></p> |

1  
2  
3  
4  
5  
6  
7  
8  
9  
10  
11  
12  
13  
14  
15  
16  
17  
18  
19  
20  
21  
22  
23  
24  
25  
26  
27  
28  
29  
30  
31  
32  
33  
34  
35  
36  
37  
38  
39  
40  
41  
42  
43  
44  
45  
46

|                                                                                                                           |                                                                                                                                                                                                                                                                                                                                                                                                                                                        |                                                                                                                                                                                                                                                                                                                                                                                                                                                                                                                          |                                                                                                                                                                                                                                                                                                                                                                                                                                                                                                                                                                                                                                            |
|---------------------------------------------------------------------------------------------------------------------------|--------------------------------------------------------------------------------------------------------------------------------------------------------------------------------------------------------------------------------------------------------------------------------------------------------------------------------------------------------------------------------------------------------------------------------------------------------|--------------------------------------------------------------------------------------------------------------------------------------------------------------------------------------------------------------------------------------------------------------------------------------------------------------------------------------------------------------------------------------------------------------------------------------------------------------------------------------------------------------------------|--------------------------------------------------------------------------------------------------------------------------------------------------------------------------------------------------------------------------------------------------------------------------------------------------------------------------------------------------------------------------------------------------------------------------------------------------------------------------------------------------------------------------------------------------------------------------------------------------------------------------------------------|
| <p><i>control over performing the behavior#</i></p>                                                                       | <p><i>necessary to take great control of one's life as in certain educational or social schemes; the delegation of increase decision-making powers to individuals or groups in a society or organization</i><br/> <u>Professional confidence</u>: <i>An individual's beliefs in his or her repertoire of skills, and ability, especially as it is applied to a task or set of tasks.</i></p>                                                           |                                                                                                                                                                                                                                                                                                                                                                                                                                                                                                                          |                                                                                                                                                                                                                                                                                                                                                                                                                                                                                                                                                                                                                                            |
| <p><b>5. Optimism</b><br/> The confidence that things will happen for the best or that desired goals will be attained</p> | <p><u>Optimism</u>: <i>The attitude that outcomes will be positive and that people's wishes or aims will be ultimately fulfilled</i><br/> <u>Pessimism</u>: <i>The attitude that things will go wrong and that people's wishes or aims are unlikely to be fulfilled</i><br/> <u>Unrealistic optimism</u>: <i>the inert tendency for humans to over-rate their own abilities and chances of positive outcomes compared to those of other people</i></p> | <p>Appropriate coding to this domain:</p> <ul style="list-style-type: none"> <li>▪ Therapist discussion of optimism or pessimism related to use of sensory rehabilitation</li> <li>▪ Positive or negative view towards process of change in study</li> </ul> <p>Inappropriate coding to this domain:</p> <ul style="list-style-type: none"> <li>▪ Feeling of anxiety, stress or burnout (code to Emotion)</li> <li>▪ Thoughts towards outcomes of sensory rehabilitation (code to Beliefs about consequences)</li> </ul> | <p><i>"I feel a mix of excitement and scepticism, to be honest" (W7_P1)</i></p> <p><i>"think it's helpful having that structure as well of the study...like there's some ownership you have to take, the responsibility you have to take to actually use the assessments to use the treatment to guide us to how to feedback about that, so, I think that is really good too."</i> (O5_P10)</p> <p><i>"the tests we're using to do the initial assessments aren't great, so to re-test ...I can't re-test again, I can't show you were 4 and now you're 5. So I can't prove it to them that what they're doing is working"</i> (Y3_P3)</p> |
|                                                                                                                           |                                                                                                                                                                                                                                                                                                                                                                                                                                                        | <p>Appropriate coding to this domain:</p>                                                                                                                                                                                                                                                                                                                                                                                                                                                                                |                                                                                                                                                                                                                                                                                                                                                                                                                                                                                                                                                                                                                                            |

|                                                                                                                                                                                                                                                                                                                       |                                                                                                                                                                                                                                                                                                                                                                                                                                                                                                                                                                                                                                                                                                                                                                                                                                                                                                                                                                                                                                                                                                                                                |                                                                                                                                                                                                                                                                                                                                                                                                                                                                                                                                                                            |                                                                                                                                                                                                                                                                                                                                                                                                                                                                                                                                                                                               |
|-----------------------------------------------------------------------------------------------------------------------------------------------------------------------------------------------------------------------------------------------------------------------------------------------------------------------|------------------------------------------------------------------------------------------------------------------------------------------------------------------------------------------------------------------------------------------------------------------------------------------------------------------------------------------------------------------------------------------------------------------------------------------------------------------------------------------------------------------------------------------------------------------------------------------------------------------------------------------------------------------------------------------------------------------------------------------------------------------------------------------------------------------------------------------------------------------------------------------------------------------------------------------------------------------------------------------------------------------------------------------------------------------------------------------------------------------------------------------------|----------------------------------------------------------------------------------------------------------------------------------------------------------------------------------------------------------------------------------------------------------------------------------------------------------------------------------------------------------------------------------------------------------------------------------------------------------------------------------------------------------------------------------------------------------------------------|-----------------------------------------------------------------------------------------------------------------------------------------------------------------------------------------------------------------------------------------------------------------------------------------------------------------------------------------------------------------------------------------------------------------------------------------------------------------------------------------------------------------------------------------------------------------------------------------------|
| <p><b>6. Beliefs about consequences</b><br/>Acceptance of the truth, reality or validity about outcomes of a behaviour in a given situation</p> <p><i>The extent to which the therapist is in favour of performing sensory rehabilitation and has positive behavioural beliefs about sensory rehabilitation #</i></p> | <p><u>Beliefs</u>: <i>The thing believed; the proposition or set of propositions held true</i></p> <p><u>Outcome expectancies</u>: <i>Cognitive, emotional, behavioural, and affective outcomes that are assumed to be associated with future or intended behaviour. These assumed outcomes can either promote or inhibit future behaviours.</i></p> <p><u>Characteristics of outcome expectancies</u>: <i>Characteristics of the cognitive, emotional and behavioural outcomes that individuals believe are associated with future or intended behaviours and that are believed to either promote or inhibit these behaviours. These include whether they are sanctions/rewards, proximal/distal, valued/not valued, probable/improbable. Salient/not salient, perceived risks or threats.</i></p> <p><u>Anticipated regret</u>: <i>A sense of the potential negative consequences of a decision that influences the choice made: for example an individual may decide not to make an investment because of the feelings associated with an imagined loss</i></p> <p><u>Consequents</u>: <i>An outcome behaviour in a given situation</i></p> | <ul style="list-style-type: none"> <li>▪ Positive or negative expectancies of use of sensory rehabilitation</li> <li>▪ Beliefs regarding treatment outcomes</li> <li>▪ Potential long-term outcomes for patients</li> <li>▪ Anticipated regret in not using sensory rehabilitation</li> </ul> <p>Inappropriate coding to this domain:</p> <ul style="list-style-type: none"> <li>▪ Beliefs about whether therapists can provide sensory rehabilitation (code to Beliefs about Capabilities)</li> <li>▪ The confidence goals will be achieved (Code to Optimism)</li> </ul> | <p><i>"I don't necessarily think the patient outcomes will improve" (C2_P7)</i></p> <p><i>"... so if there was research that showed direct improvements then I would be adopting things." (H4_P1)</i></p> <p><i>"you don't actually know yeah, if it's actually making a difference or not, is it your input or is it something else?" (Y3_P6)</i></p> <p><i>"it's great when you get a change for a client, I love that, so that's the motivator for this, if something's saying that change is possible that's what motivates me" (L9_P4) [Characteristics of outcome expectancies]</i></p> |
|-----------------------------------------------------------------------------------------------------------------------------------------------------------------------------------------------------------------------------------------------------------------------------------------------------------------------|------------------------------------------------------------------------------------------------------------------------------------------------------------------------------------------------------------------------------------------------------------------------------------------------------------------------------------------------------------------------------------------------------------------------------------------------------------------------------------------------------------------------------------------------------------------------------------------------------------------------------------------------------------------------------------------------------------------------------------------------------------------------------------------------------------------------------------------------------------------------------------------------------------------------------------------------------------------------------------------------------------------------------------------------------------------------------------------------------------------------------------------------|----------------------------------------------------------------------------------------------------------------------------------------------------------------------------------------------------------------------------------------------------------------------------------------------------------------------------------------------------------------------------------------------------------------------------------------------------------------------------------------------------------------------------------------------------------------------------|-----------------------------------------------------------------------------------------------------------------------------------------------------------------------------------------------------------------------------------------------------------------------------------------------------------------------------------------------------------------------------------------------------------------------------------------------------------------------------------------------------------------------------------------------------------------------------------------------|

|                                                                                                                                                                                                                                                                                                                                                                                                                                                                                                          |                                                                                                                                                                                                                                                                                                                                                                                                                                                                                                                                                                                                                                                                                                                                                                                                                                                                                                                                                                                                                                                                                                                                                                                               |                                                                                                                                                                                                                                                                                                                                                                                                                                                                                                                           |                                                                                                                                                                                                                                                                                                                                                                                                                                                                                                                                                                                                                                                                                                                                                                                                                                                                   |
|----------------------------------------------------------------------------------------------------------------------------------------------------------------------------------------------------------------------------------------------------------------------------------------------------------------------------------------------------------------------------------------------------------------------------------------------------------------------------------------------------------|-----------------------------------------------------------------------------------------------------------------------------------------------------------------------------------------------------------------------------------------------------------------------------------------------------------------------------------------------------------------------------------------------------------------------------------------------------------------------------------------------------------------------------------------------------------------------------------------------------------------------------------------------------------------------------------------------------------------------------------------------------------------------------------------------------------------------------------------------------------------------------------------------------------------------------------------------------------------------------------------------------------------------------------------------------------------------------------------------------------------------------------------------------------------------------------------------|---------------------------------------------------------------------------------------------------------------------------------------------------------------------------------------------------------------------------------------------------------------------------------------------------------------------------------------------------------------------------------------------------------------------------------------------------------------------------------------------------------------------------|-------------------------------------------------------------------------------------------------------------------------------------------------------------------------------------------------------------------------------------------------------------------------------------------------------------------------------------------------------------------------------------------------------------------------------------------------------------------------------------------------------------------------------------------------------------------------------------------------------------------------------------------------------------------------------------------------------------------------------------------------------------------------------------------------------------------------------------------------------------------|
| <p>1<br/>2<br/>3<br/>4<br/>5<br/>6<br/>7<br/>8<br/>9<br/>10<br/>11<br/>12<br/>13<br/>14<br/>15<br/>16<br/>17<br/>18<br/>19<br/>20<br/>21<br/>22<br/>23<br/>24<br/>25<br/>26<br/>27<br/>28<br/>29<br/>30<br/>31<br/>32<br/>33<br/>34<br/>35<br/>36<br/>37<br/>38<br/>39<br/>40<br/>41<br/>42<br/>43<br/>44<br/>45<br/>46</p> <p><b>7. Reinforcement</b><br/>Increasing the probability of a response by arranging a dependent relationship, or contingency, between the response and a given stimulus</p> | <p><u>Rewards</u> (proximal/distal, valued/ not valued, probable/improbable): <i>Return or recompense made to, or received by a person contingent on some performance.</i></p> <p><u>Incentives</u>: <i>An external stimulus, such as condition or object, that enhances or serves as a motive for behaviour</i></p> <p><u>Punishment</u>: <i>The process in which the relationship between as response and some stimulus or circumstance results in the response becoming less probable; a painful, unwanted or undesired event or circumstance imposed as a penalty on a wrongdoer</i></p> <p><u>Consequents</u>: <i>An outcome of behaviour in a given situation</i></p> <p><u>Reinforcement</u>: <i>A process in which the frequency of a response is increased by a dependent relationship or contingency with a stimulus</i></p> <p><u>Contingencies</u>: <i>A conditional probabilistic relation between two events. Contingencies may be arranged via dependencies or they may emerge by accident</i></p> <p><u>Sanctions</u>: <i>A punishment or other coercive measure, usually administered by a recognized authority, that is used to penalise and deter inappropriate or</i></p> | <p>Appropriate coding to this domain:</p> <ul style="list-style-type: none"> <li>▪ Rewards or incentives for using sensory rehabilitation</li> <li>▪ Perceived punishments, consequents, reinforcements, contingencies, sanctions related to sensory rehabilitation</li> </ul> <p>Inappropriate coding to this domain:</p> <ul style="list-style-type: none"> <li>▪ Opportunities to reinforce or consolidate skills in sensory rehabilitation, code to Skills instead (Construct: Practice/Skill development)</li> </ul> | <p><i>And also often a patient is really focused on their mobility so if a physio started working on their upper limb they'd be saying - 'but come on!' (L9_P6) [Construct: Punishment]</i></p> <p><i>"the clinical guidelines are audited and we get feedback and we have to meet the standards" (W7_P8)</i></p> <p><i>"For me it's definitely about best practice and knowing that this type of technique is best practice, it's backed up by evidence research and that I'm currently probably not doing it correctly or as much as I should be doing it so yeah, <b>I think that's definitely my motivation</b>" (Y8_P1)</i></p> <p><i>"I think everyone's very happy to do things if they feel the patient is going to get a better outcome from it, and I think that's one of the biggest drivers for our inpatient team is that outcome" (W7_I_P3)</i></p> |
|----------------------------------------------------------------------------------------------------------------------------------------------------------------------------------------------------------------------------------------------------------------------------------------------------------------------------------------------------------------------------------------------------------------------------------------------------------------------------------------------------------|-----------------------------------------------------------------------------------------------------------------------------------------------------------------------------------------------------------------------------------------------------------------------------------------------------------------------------------------------------------------------------------------------------------------------------------------------------------------------------------------------------------------------------------------------------------------------------------------------------------------------------------------------------------------------------------------------------------------------------------------------------------------------------------------------------------------------------------------------------------------------------------------------------------------------------------------------------------------------------------------------------------------------------------------------------------------------------------------------------------------------------------------------------------------------------------------------|---------------------------------------------------------------------------------------------------------------------------------------------------------------------------------------------------------------------------------------------------------------------------------------------------------------------------------------------------------------------------------------------------------------------------------------------------------------------------------------------------------------------------|-------------------------------------------------------------------------------------------------------------------------------------------------------------------------------------------------------------------------------------------------------------------------------------------------------------------------------------------------------------------------------------------------------------------------------------------------------------------------------------------------------------------------------------------------------------------------------------------------------------------------------------------------------------------------------------------------------------------------------------------------------------------------------------------------------------------------------------------------------------------|

|                                                                                                                                                                          |                                                                                                                                                                                                                                                                                                                                                                                                                                                                                                                                                                                                          |                                                                                                                                                                                                                                                                                                                                                                                                                                                                                                                                                                                                 |                                                                                                                                                                                                                                                                                                                                                                                                                                                                    |
|--------------------------------------------------------------------------------------------------------------------------------------------------------------------------|----------------------------------------------------------------------------------------------------------------------------------------------------------------------------------------------------------------------------------------------------------------------------------------------------------------------------------------------------------------------------------------------------------------------------------------------------------------------------------------------------------------------------------------------------------------------------------------------------------|-------------------------------------------------------------------------------------------------------------------------------------------------------------------------------------------------------------------------------------------------------------------------------------------------------------------------------------------------------------------------------------------------------------------------------------------------------------------------------------------------------------------------------------------------------------------------------------------------|--------------------------------------------------------------------------------------------------------------------------------------------------------------------------------------------------------------------------------------------------------------------------------------------------------------------------------------------------------------------------------------------------------------------------------------------------------------------|
| <p><b>8. Intentions</b></p> <p>A conscious decision to perform a behaviour or a resolve to act in a certain way</p> <p>Have they made a decision to provide SENSE? #</p> | <p><i>unauthorized actions.</i></p> <p><u>Stability of intentions:</u> <i>ability of one's resolve to remain in spite of disturbing influences</i></p> <p><u>Stages of Change model:</u> <i>A model that proposes that behaviour change is accomplished through five specific stages</i></p> <p><u>Transtheoretical model and stages of change:</u> <i>a five-stage theory to explain changes in people's health behaviour. It suggests that change takes time, that different interventions are effective at different stages, and that there are multiple outcomes occurring across the stages</i></p> | <p>Appropriate coding to this domain:</p> <ul style="list-style-type: none"> <li>▪ Discussion of how motivated/unmotivated therapists are to provide sensory rehabilitation</li> <li>▪ Description of inclination to use sensory rehabilitation and in what situation</li> <li>▪ Stability of intentions regarding sensory rehabilitation, stages of change model, transtheoretical model and stages of change</li> </ul> <p>Inappropriate coding to this domain:</p> <ul style="list-style-type: none"> <li>▪ Practical plans to use sensory rehabilitation (code to Goals instead)</li> </ul> | <p><i>"That's right, if you don't look, you don't know, and you don't have to do anything about it (laughter)!" (Y3_P1)</i></p> <p><i>"in my limited experience and treatment that I've used some of the SENSE practices with, I've had really significant outcomes so I'm keen to apply it more broadly I guess across the board rather than just the ones that are really severe...sensory issues and see what sort of outcomes we might have." (W13_P2)</i></p> |
| <p><b>9. Goals</b></p> <p>Mental representations of outcomes or end states that an individual wants to achieve</p> <p>How much do they want to do SENSE?#</p>            | <p><u>Goals (distal/proximal):</u> <i>Desired state of affairs of a person or system, these may be closer (proximal) or further away (distal)</i></p> <p><u>Goal priority:</u> <i>Order of importance or urgency of end state toward which one is striving</i></p> <p><u>Goal/target setting:</u> <i>A process that establishes specific time based behavioural targets that are measureable, achievable and realistic</i></p> <p><u>Goals (autonomous/controlled):</u> <i>The end</i></p>                                                                                                               | <p>Appropriate coding to this domain:</p> <ul style="list-style-type: none"> <li>▪ Goal priority, action planning and implementation intention related to sensory rehabilitation</li> <li>▪ Description of whether or not providing sensory rehabilitation is a priority</li> <li>▪ Practical plans to apply sensory rehabilitation or not</li> </ul> <p>Inappropriate coding to this domain:</p> <ul style="list-style-type: none"> <li>▪ Discussion of readiness to change</li> </ul>                                                                                                         | <p><i>"there's so many other things we need to look at like home assess and other functions and mobility, so yeah, it's a bit low on the priority list" (Y3_P6)</i></p> <p><i>"if you have the proper equipment, we will be more confident to use it and we'll look more professional too" (Y3_P6)</i></p>                                                                                                                                                         |



1  
2  
3  
4  
5  
6  
7  
8  
9  
10  
11  
12  
13  
14  
15  
16  
17  
18  
19  
20  
21  
22  
23  
24  
25  
26  
27  
28  
29  
30  
31  
32  
33  
34  
35  
36  
37  
38  
39  
40  
41  
42  
43  
44  
45  
46

|                                                                                                                                                                                                  |                                                                                                                                                                                                                                                                                                                                                                                                                                                                                                                                                                                                                                                                      |                                                                                                                                                                                                                                                                                                                                                                                                                                                                                                                                                                                        |                                                                                                                                                                                                                                                                                                                                                                                                                                   |
|--------------------------------------------------------------------------------------------------------------------------------------------------------------------------------------------------|----------------------------------------------------------------------------------------------------------------------------------------------------------------------------------------------------------------------------------------------------------------------------------------------------------------------------------------------------------------------------------------------------------------------------------------------------------------------------------------------------------------------------------------------------------------------------------------------------------------------------------------------------------------------|----------------------------------------------------------------------------------------------------------------------------------------------------------------------------------------------------------------------------------------------------------------------------------------------------------------------------------------------------------------------------------------------------------------------------------------------------------------------------------------------------------------------------------------------------------------------------------------|-----------------------------------------------------------------------------------------------------------------------------------------------------------------------------------------------------------------------------------------------------------------------------------------------------------------------------------------------------------------------------------------------------------------------------------|
|                                                                                                                                                                                                  | <p><i>state toward which one is striving: the purpose of an activity or endeavour. It can be identified by observing that a person ceases or changes their behaviour upon attaining this state; proficiency in a task to be achieved within a set period of time.</i></p> <p><u>Action planning:</u> <i>The action or process of forming a plan regarding a thing to be done or a deed</i></p> <p><u>Implementation intention:</u> <i>The plan that one creates in advance of when, where and how one will enact a behaviour</i></p>                                                                                                                                 | <p>behaviour in sensory rehabilitation (Code to Intentions instead)</p>                                                                                                                                                                                                                                                                                                                                                                                                                                                                                                                |                                                                                                                                                                                                                                                                                                                                                                                                                                   |
| <p><b>10. Memory, attention and decision processes</b></p> <p>The ability to retain information, focus selectively on aspects of the environment and choose between two or more alternatives</p> | <p><u>Memory:</u> <i>The ability to retain information or a representation of a past experience, based on the mental processes of learning or encoding retention across some interval of time, and retrieval or reactivation of the memory; specific information of a specific task</i></p> <p><u>Attention:</u> <i>A state of awareness in which the senses are focused selectively on aspects of the environment and the central nervous system is in a state of readiness to respond to stimuli</i></p> <p><u>Attention control:</u> <i>The extent to which a person can concentrate on relevant cues and ignore all irrelevant cues in a given situation</i></p> | <p>Appropriate coding to this domain:</p> <ul style="list-style-type: none"> <li>▪ Retaining information on how to deliver sensory rehabilitation</li> <li>▪ Deciding between the use of different sensory assessments</li> <li>▪ Cognitive overload/fatigue related to delivering sensory rehabilitation</li> </ul> <p>Inappropriate coding to this domain:</p> <ul style="list-style-type: none"> <li>▪ Discussion of system pressures that impact on decisions to use sensory rehabilitation (Code to Environmental Context and Resources: e.g. Environmental Stressors)</li> </ul> | <p><i>“For me it’s more about the scale of prioritisation.... is it what they should be doing out amongst all of all their other priorities?” (O5_P2)</i></p> <p><i>“and that affects your confidence and your quality of treatment because you might...upskill for a patient and you don’t have another patient with sensory loss for ages and you’re kind of like going back to ‘oh, what did I do last time?’” (Y3_P5)</i></p> |

|                                                                                                                                                                                                                                                                                                                                              |                                                                                                                                                                                                                                                                                                                                                                                                                                                                                                                                                                                                                                                                                                                                                                                                                                           |                                                                                                                                                                                                                                                                                                                                                                                                                                                                                                                                                                                                                                                                                                                                              |                                                                                                                                                                                                                                                                                                                                                                                                                                                                                                                                                                                                                                                                                                                                               |
|----------------------------------------------------------------------------------------------------------------------------------------------------------------------------------------------------------------------------------------------------------------------------------------------------------------------------------------------|-------------------------------------------------------------------------------------------------------------------------------------------------------------------------------------------------------------------------------------------------------------------------------------------------------------------------------------------------------------------------------------------------------------------------------------------------------------------------------------------------------------------------------------------------------------------------------------------------------------------------------------------------------------------------------------------------------------------------------------------------------------------------------------------------------------------------------------------|----------------------------------------------------------------------------------------------------------------------------------------------------------------------------------------------------------------------------------------------------------------------------------------------------------------------------------------------------------------------------------------------------------------------------------------------------------------------------------------------------------------------------------------------------------------------------------------------------------------------------------------------------------------------------------------------------------------------------------------------|-----------------------------------------------------------------------------------------------------------------------------------------------------------------------------------------------------------------------------------------------------------------------------------------------------------------------------------------------------------------------------------------------------------------------------------------------------------------------------------------------------------------------------------------------------------------------------------------------------------------------------------------------------------------------------------------------------------------------------------------------|
|                                                                                                                                                                                                                                                                                                                                              | <p><u>Decision making:</u> <i>The cognitive process of choosing between two or more alternatives, ranging from the relatively clear-cut to the complex</i></p> <p><u>Cognitive overload/tiredness:</u> <i>The situation in which the demands placed on a person by mental work are greater than a person's mental abilities</i></p>                                                                                                                                                                                                                                                                                                                                                                                                                                                                                                       |                                                                                                                                                                                                                                                                                                                                                                                                                                                                                                                                                                                                                                                                                                                                              |                                                                                                                                                                                                                                                                                                                                                                                                                                                                                                                                                                                                                                                                                                                                               |
| <p><b>11. Environmental context and resources</b></p> <p>Any circumstance of a person's situation or environment that discourages or encourages the development of skills and abilities, independence, social competence and adaptive behaviour</p> <p><i>The extent to which the therapist feels the environmental context supports</i></p> | <p><u>Environmental stressors:</u> <i>External factors in the environment that cause stress</i></p> <p><u>Resources/material resources:</u> <i>Commodities and human resources used in enacting a behaviour</i></p> <p><u>Organizational culture/climate:</u> <i>A distinctive pattern of thought and behaviour shared by members of the same organization and reflected in their language, values, attitudes, beliefs and customs</i></p> <p><u>Salient events/critical incidents:</u> <i>Occurrences that one judges to be distinctive, prominent or otherwise significant</i></p> <p><u>Person x environment interaction:</u> <i>Interplay between the individual and their surroundings</i></p> <p><u>Barriers and facilitators:</u> <i>In psychological contexts, barriers/facilitators are mental, emotional or behavioural</i></p> | <p>Appropriate coding to this domain:</p> <ul style="list-style-type: none"> <li>▪ Availability of equipment to deliver sensory rehabilitation</li> <li>▪ Setting in which sensory rehabilitation will be delivered</li> <li>▪ Organisational culture/climate, impacting on delivery of sensory rehabilitation</li> <li>▪ Description of how more time will be required to deliver sensory rehabilitation</li> <li>▪ Patient factors that would influence whether sensory rehabilitation was offered or provided</li> <li>▪ Salient events related to sensory rehabilitation</li> </ul> <p>Inappropriate coding to this domain:</p> <ul style="list-style-type: none"> <li>▪ Patient factors based on interpersonal processes and</li> </ul> | <p><i>"I'm really pleased we're getting the equipment provided because I think that would have been the largest barrier" (Y8_P1) [Construct: Resources/material resources]</i></p> <p><i>"I feel it's a supportive culture that wants to look at what evidence based information is out there and how do we further our clinicians' knowledge, so I feel... it's a good environment to make change." (L18_P1)</i></p> <p><i>"I think bed pressures could always be something that could come up, if there's a pressure to discharge a patient and we haven't been able to follow through with all the sensory interventions" (Y8_P6)</i></p> <p><i>"I think it's just the health care system, of processes have to happen, we have to</i></p> |



1  
2  
3  
4  
5  
6  
7  
8  
9  
10  
11  
12  
13  
14  
15  
16  
17  
18  
19  
20  
21  
22  
23  
24  
25  
26  
27  
28  
29  
30  
31  
32  
33  
34  
35  
36  
37  
38  
39  
40  
41  
42  
43  
44  
45  
46

|                                                                                                                                                                                                                           |                                                                                                                                                                                                                                                                                                                                                                                                                                                                                                                                                   |                                                                                                                                                                                                                                                                                                                                                                                                                                                                                                        |                                                                                                                                                                                                                                                                                                                                                                                                                                                                                                                                                                                               |
|---------------------------------------------------------------------------------------------------------------------------------------------------------------------------------------------------------------------------|---------------------------------------------------------------------------------------------------------------------------------------------------------------------------------------------------------------------------------------------------------------------------------------------------------------------------------------------------------------------------------------------------------------------------------------------------------------------------------------------------------------------------------------------------|--------------------------------------------------------------------------------------------------------------------------------------------------------------------------------------------------------------------------------------------------------------------------------------------------------------------------------------------------------------------------------------------------------------------------------------------------------------------------------------------------------|-----------------------------------------------------------------------------------------------------------------------------------------------------------------------------------------------------------------------------------------------------------------------------------------------------------------------------------------------------------------------------------------------------------------------------------------------------------------------------------------------------------------------------------------------------------------------------------------------|
| <p><i>performance of sensory rehabilitation#</i></p>                                                                                                                                                                      | <p><i>limitations/strengths in individuals or groups</i></p>                                                                                                                                                                                                                                                                                                                                                                                                                                                                                      | <p>views/opinions of patients – this should be coded to social influence</p>                                                                                                                                                                                                                                                                                                                                                                                                                           | <p><i>deliver a service and we have to meet targets...improving our practices is only part of what we need to deliver...so....it's all a balance" (L9_P3) [Environmental stressors]</i></p> <p><i>"the other thing is in my limited experience and treatment that I've used some of the SENSE practices with, I've had really significant outcomes so I'm keen to apply it more broadly" [Salient event]</i></p> <p><i>"I think it's pretty rare too... that patients come through sort of the inpatient rehab part of the continuum, when sensation is their biggest issue" (W7_P12)</i></p> |
| <p><b>12. Social influences</b><br/>Those <b>interpersonal processes</b> that can cause individuals to change their thoughts, feelings or behaviours</p> <p><i>What do others think of what they do? Who are they</i></p> | <p><u>Social pressure</u>: <i>the exertion of influence on a person or group by another person or group</i></p> <p><u>Social norms</u>: <i>Socially determined consensual standards that indicate a) what behaviours are considered typical in a given context and b) what behaviours are considered proper in the context</i></p> <p><u>Group conformity</u>: <i>The act of consciously maintaining a certain degree of similarity to those in your general social circles</i></p> <p><u>Social comparisons</u>: <i>The process by which</i></p> | <p>Appropriate coding to this domain:</p> <ul style="list-style-type: none"> <li>▪ Views and opinions of others (colleagues, patients, professional groups) influencing decision to provide sensory rehabilitation#</li> <li>▪ Impact of others on whether or not sensory rehabilitation is provided</li> <li>▪ Discussing importance of patient engagement/buy-in</li> <li>▪ Social pressure to deliver or not deliver sensory rehabilitation</li> <li>▪ Social support to provide sensory</li> </ul> | <p><i>"I'm finding that some patients are very savvy and have read up a lot about things and they will actually say 'are you doing this treatment technique?'"(R6_P4)</i></p> <p><i>"our consultant might start asking us questions in terms of why are we spending so much time on sensation when we should be doing A, B and C in terms of discharge planning" (C2_P5)</i></p> <p><i>"Our stroke consultant's really into research and new things so she'd be very,</i></p>                                                                                                                 |

|                                                                                                                                                                                                                                            |                                                                                                                                                                                                                                                                                                                                                                                                                                                                                                                                                                                                                                                                                                                                                                                                                                                                                                                                                                                                                                                                                                                                                                                                                                       |                                                                                                                                                                                                                                                                                                                         |                                                                                                                                                                                                                                                                                                                                                                                                                                                                                                                          |
|--------------------------------------------------------------------------------------------------------------------------------------------------------------------------------------------------------------------------------------------|---------------------------------------------------------------------------------------------------------------------------------------------------------------------------------------------------------------------------------------------------------------------------------------------------------------------------------------------------------------------------------------------------------------------------------------------------------------------------------------------------------------------------------------------------------------------------------------------------------------------------------------------------------------------------------------------------------------------------------------------------------------------------------------------------------------------------------------------------------------------------------------------------------------------------------------------------------------------------------------------------------------------------------------------------------------------------------------------------------------------------------------------------------------------------------------------------------------------------------------|-------------------------------------------------------------------------------------------------------------------------------------------------------------------------------------------------------------------------------------------------------------------------------------------------------------------------|--------------------------------------------------------------------------------------------------------------------------------------------------------------------------------------------------------------------------------------------------------------------------------------------------------------------------------------------------------------------------------------------------------------------------------------------------------------------------------------------------------------------------|
| <p>and how does that influence what they do?*</p> <p>The extent to which therapists feel social pressure to engage in sensory rehabilitation#</p> <p>*Interpersonal processes indicate an interaction that is verbal or non-verbal ***</p> | <p>people evaluate their attitudes, abilities or performance relative to others</p> <p><u>Group norms:</u> Any behaviour, belief, attitude or emotional reaction held to be correct or acceptable by a given group in society</p> <p><u>Social support:</u> The apperception or provision of assistance or comfort to others, typically in order to help them cope with a variety of biological, psychological and social stressors.</p> <p>Support may arise from any interpersonal relationship in an individual's social network, involving friends, neighbours, religious institutions, colleagues, caregivers of support groups</p> <p><u>Power:</u> The capacity to influence others, even when they try to resist this influence</p> <p><u>Intergroup conflict:</u> Disagreement or confrontation between two or more groups and their members. This may involve physical violence, interpersonal discord, or psychological tension.</p> <p><u>Alienation:</u> Estrangement from one's social group; a deep seated sense of dissatisfaction with one's personal experiences that can be a source of lack of trust in one's social or physical environment or in oneself; the experience of separation between thoughts and</p> | <p>rehabilitation</p> <ul style="list-style-type: none"> <li>▪ Modelling of delivery, dose and method of sensory rehabilitation</li> <li>▪ Patient views regarding sensory rehabilitation</li> </ul> <p>To code patient-related factors to this domain there should be an underlying interpersonal process involved</p> | <p>very keen to have this happen" (Y8_P5)</p> <p>"quite often it feels like it's up to individual therapists to ...to bring on change umm, but in order to do that, that requires a lot of energy....and effort" (L9_P3) [Construct: alienation]</p> <p>"There's often a confusion between motor and sensation, like sometimes they'll say [patient]'my muscles need to be stronger' but when you test it's very obvious that it's not actually a motor issue, it's well, it's more of a sensory impairment" (L9_P3)</p> |
|--------------------------------------------------------------------------------------------------------------------------------------------------------------------------------------------------------------------------------------------|---------------------------------------------------------------------------------------------------------------------------------------------------------------------------------------------------------------------------------------------------------------------------------------------------------------------------------------------------------------------------------------------------------------------------------------------------------------------------------------------------------------------------------------------------------------------------------------------------------------------------------------------------------------------------------------------------------------------------------------------------------------------------------------------------------------------------------------------------------------------------------------------------------------------------------------------------------------------------------------------------------------------------------------------------------------------------------------------------------------------------------------------------------------------------------------------------------------------------------------|-------------------------------------------------------------------------------------------------------------------------------------------------------------------------------------------------------------------------------------------------------------------------------------------------------------------------|--------------------------------------------------------------------------------------------------------------------------------------------------------------------------------------------------------------------------------------------------------------------------------------------------------------------------------------------------------------------------------------------------------------------------------------------------------------------------------------------------------------------------|

1  
2  
3  
4  
5  
6  
7  
8  
9  
10  
11  
12  
13  
14  
15  
16  
17  
18  
19  
20  
21  
22  
23  
24  
25  
26  
27  
28  
29  
30  
31  
32  
33  
34  
35  
36  
37  
38  
39  
40  
41  
42  
43  
44  
45  
46

|                                                                                                                                                                                                                     |                                                                                                                                                                                                                                                                                                                                                                                                                                                                                                                                                                                                                                                                                                                                                                                                                              |                                                                                                                                                                                                                                                                                                                                                                                                                                                                                                            |                                                                                                                                                                                                                                                                                                                                                                                                                                                                                                   |
|---------------------------------------------------------------------------------------------------------------------------------------------------------------------------------------------------------------------|------------------------------------------------------------------------------------------------------------------------------------------------------------------------------------------------------------------------------------------------------------------------------------------------------------------------------------------------------------------------------------------------------------------------------------------------------------------------------------------------------------------------------------------------------------------------------------------------------------------------------------------------------------------------------------------------------------------------------------------------------------------------------------------------------------------------------|------------------------------------------------------------------------------------------------------------------------------------------------------------------------------------------------------------------------------------------------------------------------------------------------------------------------------------------------------------------------------------------------------------------------------------------------------------------------------------------------------------|---------------------------------------------------------------------------------------------------------------------------------------------------------------------------------------------------------------------------------------------------------------------------------------------------------------------------------------------------------------------------------------------------------------------------------------------------------------------------------------------------|
|                                                                                                                                                                                                                     | <p><i>feelings</i></p> <p><u>Group identity:</u> <i>the set of behavioural or personal characteristics by which an individual is recognizable [and portrays] as a member of a group</i></p> <p><u>Modeling:</u> <i>In developmental psychology the process in which one or more individuals or other entities serve as examples (models) that a child will copy</i></p>                                                                                                                                                                                                                                                                                                                                                                                                                                                      |                                                                                                                                                                                                                                                                                                                                                                                                                                                                                                            |                                                                                                                                                                                                                                                                                                                                                                                                                                                                                                   |
| <p><b>13. Emotion</b></p> <p>A complex reaction pattern, involving experiential, behavioural and physiological elements, by which the individual attempts to deal with a personally significant matter or event</p> | <p><u>Fear:</u> <i>An intense emotion aroused by the detection of imminent threat, involving an immediate alarm reaction that mobilizes the organism by triggering a set of physiological changes</i></p> <p><u>Anxiety:</u> <i>A mood state characterized by apprehension and somatic symptoms of tension in which an individual anticipates impending danger, catastrophe or misfortune.</i></p> <p><u>Affect:</u> <i>An experience or feeling of emotion, ranging from suffering to elation, from the simplest to the most complex sensations of feelings, and from the most normal to the most pathological emotional reactions.</i></p> <p><u>Stress:</u> <i>A state of physiological or psychological response to internal or external stressors</i></p> <p><u>Depression:</u> <i>A mental state that presents</i></p> | <p>Appropriate coding to this domain:</p> <ul style="list-style-type: none"> <li>▪ Discussion of emotions experienced by therapists towards providing sensory rehabilitation</li> <li>▪ Description of when therapists would be worried/concerned about providing sensory rehabilitation</li> </ul> <p>Inappropriate coding to this domain:</p> <ul style="list-style-type: none"> <li>▪ Description of patients' emotions regarding sensory rehabilitation (code to Social Influences instead)</li> </ul> | <p><i>"I feel a mix of excitement and scepticism, to be honest" (W7_P1)</i></p> <p><i>"I also feel a little bit nervous...with doing this amazing training and they'll be no one to use it on for 6 months and that makes me feel a bit nervous... when I finally get to that client, will I be ready?" (Y3_P4)</i></p> <p><i>"there's a bit of trepidation around...needing to achieve a certain standard and being able to use a new tool and being able to... do it correctly" (Z1_P3)</i></p> |

|                                                                                                                                 |                                                                                                                                                                                                                                                                                                                                                                                                                                                                                                                                                                                                                                  |                                                                                                                                                                                                                                                                                                                                                         |                                                                                                                                                                                                                                                                                                                                                                                                                                                                                                                                 |
|---------------------------------------------------------------------------------------------------------------------------------|----------------------------------------------------------------------------------------------------------------------------------------------------------------------------------------------------------------------------------------------------------------------------------------------------------------------------------------------------------------------------------------------------------------------------------------------------------------------------------------------------------------------------------------------------------------------------------------------------------------------------------|---------------------------------------------------------------------------------------------------------------------------------------------------------------------------------------------------------------------------------------------------------------------------------------------------------------------------------------------------------|---------------------------------------------------------------------------------------------------------------------------------------------------------------------------------------------------------------------------------------------------------------------------------------------------------------------------------------------------------------------------------------------------------------------------------------------------------------------------------------------------------------------------------|
|                                                                                                                                 | <p><i>with depressed mood, loss of interest or pleasure, feelings of guilt or low self-worth, disturbed sleep or appetite, low energy, and poor concentration</i></p> <p><i>Positive/negative affect: the internal feeling/state that occurs when a goal has/has not been attained. A source of threat has/has not been avoided, or the individual is/is not satisfied with the present state of affairs</i></p> <p><i>Burn-out: Physical, emotional or mental exhaustion, especially in one's job or career, accompanied by decreased motivation, lowered performance and negative attitudes towards oneself and others</i></p> |                                                                                                                                                                                                                                                                                                                                                         |                                                                                                                                                                                                                                                                                                                                                                                                                                                                                                                                 |
| <p><b>14. Behavioural regulation</b></p> <p>Anything aimed at managing or changing objectively observed or measured actions</p> | <p><i>Self-monitoring: A method used in behavioural management in which individuals keep a record of their behaviour, especially in connection with efforts to changes or regulate the self; a personality trait reflecting an ability to modify one's behaviour in response to a situation</i></p> <p><i>Breaking habit: to discontinue a behaviour or sequence of behaviours that is automatically activated by relevant situational cues</i></p> <p><i>Action planning: The action or process of</i></p>                                                                                                                      | <p>Appropriate coding to this domain:</p> <ul style="list-style-type: none"> <li>▪ Discussion regarding habits and breaking old habits to allow for sensory rehabilitation</li> <li>▪ Self-regulatory strategies that would influence provision of sensory rehabilitation</li> <li>▪ Descriptions of auditing recommended for implementation</li> </ul> | <p><i>"am I going to mess it up and fall back to my old ways?" (Y3_P7)</i></p> <p><i>"it's a big organisation, but here locally, it's quite small so changes will happen quite quickly." (H4_P10)</i></p> <p><i>"I think it's [change] something that's always possible but not necessarily always easy. I think sometimes it's really hard to change your practice and that might be for multiple reasons, maybe you've practised in that way for a long time or that's what you were taught in a particular course or</i></p> |

1  
2  
3  
4  
5  
6  
7  
8  
9  
10  
11  
12  
13  
14  
15  
16  
17  
18  
19  
20  
21  
22  
23  
24  
25  
26  
27  
28  
29  
30  
31  
32  
33  
34  
35  
36  
37  
38  
39  
40  
41  
42  
43  
44  
45  
46

|  |                                                        |  |                                                                                                                                                                                                                                                                                                                                                                                                                                                                                            |
|--|--------------------------------------------------------|--|--------------------------------------------------------------------------------------------------------------------------------------------------------------------------------------------------------------------------------------------------------------------------------------------------------------------------------------------------------------------------------------------------------------------------------------------------------------------------------------------|
|  | forming a plan regarding a thing to be done or a deed. |  | at university and so with the new literature and research that's coming out and evidence-base, sometimes it's more difficult to take that on board" (Y8_P1)<br><br>I find on inpatient rehab where we've got more access to time I can introduce that and then we can go with, ok for 3 days a week for lower limbs and 2 days a week we work on lower limbs but we have access to seeing them everyday. <b>We can accommodate sometimes that way</b> (L9_P1) [Construct: Action planning] |
|--|--------------------------------------------------------|--|--------------------------------------------------------------------------------------------------------------------------------------------------------------------------------------------------------------------------------------------------------------------------------------------------------------------------------------------------------------------------------------------------------------------------------------------------------------------------------------------|

*Structure and definitions in codebook guided by:*

Presseau J, Mutsaers B, Al-Jaishi AA, Squires, et al. (2017). Barriers and facilitators to healthcare professional behaviour change in clinical trials using the Theoretical Domains Framework: a case study of a trial of individualized temperature-reduced haemodialysis. *Trials*, 18(1), 227.

Bosch M, McKenzie JE, Ponsford JL, Turner S, et al. (2019). Evaluation of a targeted, theory-informed implementation intervention designed to increase uptake of emergency management recommendations regarding adult patients with mild traumatic brain injury: results of the NET cluster randomised trial. *Imp Sci*, 14(1), 4.

# Michie, S., Atkins, L., & West, R. (2014). The behaviour change wheel. *A guide to designing interventions*. 1st ed. Great Britain: Silverback Publishing, 1003-1010.

## Appendix 3.

Study: Factors influencing allied health professionals' implementation of upper limb sensory rehabilitation for stroke survivors: A qualitative study to inform knowledge translation

### Normalisation Process Theory (NPT) Codebook

| Construct 1: COHERENCE <i>"Making sense of it"</i>                                                                                                                                                                                                     |                                                                             |                                                                                                                                                                                                                                                                                                                                                                                                       |                                                                                                                                                                                                                                                                                                                                                                                                                                                                                                                                     |
|--------------------------------------------------------------------------------------------------------------------------------------------------------------------------------------------------------------------------------------------------------|-----------------------------------------------------------------------------|-------------------------------------------------------------------------------------------------------------------------------------------------------------------------------------------------------------------------------------------------------------------------------------------------------------------------------------------------------------------------------------------------------|-------------------------------------------------------------------------------------------------------------------------------------------------------------------------------------------------------------------------------------------------------------------------------------------------------------------------------------------------------------------------------------------------------------------------------------------------------------------------------------------------------------------------------------|
| Coherence is the sense-making work that people do individually & collectively when faced with the problem of operationalizing some set of practices.<br><i>What knowledge, skills, behaviours, actors and actions are required to implement SENSE?</i> |                                                                             |                                                                                                                                                                                                                                                                                                                                                                                                       |                                                                                                                                                                                                                                                                                                                                                                                                                                                                                                                                     |
| Component                                                                                                                                                                                                                                              | Definition                                                                  | Guidance                                                                                                                                                                                                                                                                                                                                                                                              | Sample quotes                                                                                                                                                                                                                                                                                                                                                                                                                                                                                                                       |
| <b>Differentiation</b><br><br><i>Understanding the uniqueness of it</i><br><i>Does the therapist recognize the SENSE approach as different from their existing ways of working?</i>                                                                    | How a set of practices and their objects are different from each other      | <u>Appropriate coding</u> to this construct component: <ul style="list-style-type: none"> <li>Understanding the differences between informal and standardised sensory Axs</li> <li>Understanding the differences between other and past sensory rehabilitation approaches and SENSE therapy</li> </ul> <u>Inappropriate coding</u> : views on effectiveness of SENSE (code to communal specification) | <i>"I do assess sensation and I do treat sensation but I don't actually use any of those <b>formalised things</b>" (W7_P5)</i><br><br><i>"it's all about <b>compensating</b> for something and educating a patient or their family rather than actually taking the time to retrain" (C2_P7)</i>                                                                                                                                                                                                                                     |
| <b>Individual specification</b><br><br><i>Individually interpreting it:</i><br><i>Does the therapist identify their personal role and responsibilities with using SENSE?</i>                                                                           | Understanding specific tasks and responsibilities around a set of practices | <u>Appropriate coding</u> to this construct component: <ul style="list-style-type: none"> <li>Individual tasks a therapist needs to do to understand and start using SENSE Assess and SENSE therapy</li> </ul>                                                                                                                                                                                        | <i>"it's helpful having that structure as well of the study...there's some ownership you have to take, the responsibility you have to take to <b>actually use the assessments</b>" (O5_P10)</i><br><br><i>"I think the hard thing for me is because I did go to a SENSE workshop, I know that there is so much more that could be done and with us not having the equipment, <b>it's a matter perhaps making do with the principles</b> but you...but like just knowing that's there's so much more that could be done" (H4_P2)</i> |
| <b>Communal specification</b><br><br><i>Collectively interpreting it:</i>                                                                                                                                                                              | Building a shared understanding of aims, objectives,                        | <u>Appropriate coding</u> to this construct component: <ul style="list-style-type: none"> <li>The development of a group or department understanding of SENSE Assess and SENSE therapy</li> </ul>                                                                                                                                                                                                     | <i>"I suppose, you know, if it (SENSE therapy) <b>needs a lot of kind of one-on-one focus</b>, that might be a problem." (H17_P1)</i><br><br><i>"It feels more old-fashioned not to empower them to go away and train the carer to do the program with a client, we don't do a</i>                                                                                                                                                                                                                                                  |



|                                                                                                                                                                                                                                                                                                                                                                                     |                                                                                           |                                                                                                                                                                                                                                                                      |                                                                                                                                                                                                                                                                                                                                                                                                                                                                                                                                                                                                                                                                                                                                                                                                                                    |
|-------------------------------------------------------------------------------------------------------------------------------------------------------------------------------------------------------------------------------------------------------------------------------------------------------------------------------------------------------------------------------------|-------------------------------------------------------------------------------------------|----------------------------------------------------------------------------------------------------------------------------------------------------------------------------------------------------------------------------------------------------------------------|------------------------------------------------------------------------------------------------------------------------------------------------------------------------------------------------------------------------------------------------------------------------------------------------------------------------------------------------------------------------------------------------------------------------------------------------------------------------------------------------------------------------------------------------------------------------------------------------------------------------------------------------------------------------------------------------------------------------------------------------------------------------------------------------------------------------------------|
| <p>1 Does the therapist<br/>2 recognise the steps<br/>3 needed to assist in the<br/>4 integration of SENSE?<br/>5<br/>6<br/>7<br/>8</p>                                                                                                                                                                                                                                             | <p>and expected<br/>benefits of a set of<br/>practices.</p>                               | <ul style="list-style-type: none"> <li>▪ A group trying to identify and anticipate how SENSE Assess and SENSE therapy will fit with current practice</li> </ul>                                                                                                      | <p>lot of stuff to people..." (W7_P1)</p> <p>"also with the intensity with which we provide therapy, I feel like we, it's so much less than what is in the SENSE study and even though I am aware of it, and I just can't imagine how I can give that intensity to a client" (O5_P8)</p>                                                                                                                                                                                                                                                                                                                                                                                                                                                                                                                                           |
| <p>9 <b>Internalization</b><br/>10<br/>11 <u>Coming to a conclusion:</u><br/>12 Does the therapist<br/>13 identify any benefit<br/>14 in adopting the SENSE<br/>15 approach?<br/>16<br/>17<br/>18<br/>19<br/>20<br/>21<br/>22<br/>23<br/>24<br/>25<br/>26<br/>27</p>                                                                                                                | <p>Understanding the<br/>value, benefits and<br/>importance of a set<br/>of practices</p> | <p>Appropriate coding to this construct component:</p> <ul style="list-style-type: none"> <li>▪ Understanding the value, benefits and importance of SENSE Assess and SENSE therapy</li> </ul>                                                                        | <p>"I guess the impression is that the <b>treatment approach works</b> so that is what I'm basing my enthusiasm on that it is actually going to improve people's sensation and translate into their function" (R6_P3)</p> <p>"well we also have a lot of people here...there's a sense that (laughs) well, there's a sense the SENSE is valuable" (O5_P8)</p> <p>"because the loss of sensation does have such huge impact on people's function and I think to be able to implement something that is going to make a huge difference for patients is really exciting, regardless of how that is actually put in place" (H4_P2)</p> <p>"but also at the back of my mind going, how long do all of these assessments take and ....<b>would they actually assess everything that I need to know for my patients.</b>" (O5_01_P7)</p> |
| <p>28 <b>Construct 2: COGNITIVE PARTICIPATION</b> 'Enrolment and <b>engagement</b> of individuals and groups' "Working out participation"</p>                                                                                                                                                                                                                                       |                                                                                           |                                                                                                                                                                                                                                                                      |                                                                                                                                                                                                                                                                                                                                                                                                                                                                                                                                                                                                                                                                                                                                                                                                                                    |
| <p>29 <b>Cognitive Participation</b> is the <b>relational work</b> that people do to build and sustain a community of practice around a new technology or complex intervention. <b>Do participants</b><br/>30 <b>view the intervention as something worthwhile and appropriate to commit their individual time and effort [signing up] to bring about the intended outcome?</b></p> |                                                                                           |                                                                                                                                                                                                                                                                      |                                                                                                                                                                                                                                                                                                                                                                                                                                                                                                                                                                                                                                                                                                                                                                                                                                    |
| <p>31 Component</p>                                                                                                                                                                                                                                                                                                                                                                 | <p>Definition</p>                                                                         | <p>Guidance</p>                                                                                                                                                                                                                                                      | <p>Sample quotes</p>                                                                                                                                                                                                                                                                                                                                                                                                                                                                                                                                                                                                                                                                                                                                                                                                               |
| <p>33 <b>Initiation</b><br/>34 <u>Having the skills to</u><br/>35 <u>engage</u><br/>36 <u>To what extent does the</u><br/>37 <u>therapist appear</u><br/>38 <u>to be a supporter of the</u><br/>39 <u>process to integrate</u><br/>40 <u>SENSE?</u><br/>41<br/>42</p>                                                                                                               | <p>Whether or not users are working to drive an intervention forward</p>                  | <p>Appropriate coding to this construct component:</p> <ul style="list-style-type: none"> <li>▪ The work done to setup systems and procedures to allow the use of SENSE Assess and SENSE therapy</li> <li>▪ The engagement with others to introduce SENSE</li> </ul> | <p>"we're getting training...we're getting kits.. we're getting the assessment tools and..we all would know about it I think helps me to feel more able to do something a lot more formally and a lot more structured way" (O5_01_P7)</p> <p>"And...if we did need to see our client more than what our usual is, which is once a week, then that would be agreed, if we could justify it" (W7_P3)</p>                                                                                                                                                                                                                                                                                                                                                                                                                             |

|                                                                                                                                                                                                                                                                                            |                                                                                                                               |                                                                                                                                                                                                                                                                                                                                                                                  |                                                                                                                                                                                                                                                                                                                                                             |
|--------------------------------------------------------------------------------------------------------------------------------------------------------------------------------------------------------------------------------------------------------------------------------------------|-------------------------------------------------------------------------------------------------------------------------------|----------------------------------------------------------------------------------------------------------------------------------------------------------------------------------------------------------------------------------------------------------------------------------------------------------------------------------------------------------------------------------|-------------------------------------------------------------------------------------------------------------------------------------------------------------------------------------------------------------------------------------------------------------------------------------------------------------------------------------------------------------|
| <p>1</p> <p>2</p> <p>3 <b>Enrolment</b></p> <p>4 <u>Organising people</u></p> <p>5 <i>Has the therapist made</i></p> <p>6 <i>any adaptations or</i></p> <p>7 <i>assisted in the</i></p> <p>8 <i>reorganisation process</i></p> <p>9 <i>leading</i></p> <p>10 <i>to implementation?</i></p> | <p>The work users do to organise themselves and their co-workers to participate in the new practice.</p>                      | <p>Appropriate coding to this construct component:</p> <ul style="list-style-type: none"> <li>▪ Therapists ‘buy-in’ towards SENSE</li> <li>▪ The building of communal engagement towards SENSE</li> </ul>                                                                                                                                                                        | <p><i>“I would like us to be known as a centre of excellence and to be able to provide it (SENSe)” (Z1_P1)</i></p> <p><i>“Maybe we can co-treat together” (O5_P8)</i></p>                                                                                                                                                                                   |
| <p>13 <b>Legitimation</b></p> <p>14 <u>Believing practice is valid</u></p> <p>15 <i>Does the therapist</i></p> <p>16 <i>believe that it is</i></p> <p>17 <i>appropriate for them to</i></p> <p>18 <i>be involved in</i></p> <p>19 <i>integrating SENSe?</i></p>                            | <p>Users’ belief that the practice is right for them in their context, and that they can make a valid contribution to it.</p> | <p><u>Appropriate coding</u> to this construct component:</p> <ul style="list-style-type: none"> <li>▪ The role of OT/PT in sensory rehabilitation</li> <li>▪ The contribution therapists feel they can make</li> </ul> <p><u>Inappropriate coding</u> to this domain:</p> <ul style="list-style-type: none"> <li>▪ Who does the work (code to Skill set workability)</li> </ul> | <p><i>“For me it’s more about the scale of prioritisation... is it [SENSe] what they should be doing out amongst all of all their other priorities?” (O5_P2)</i></p> <p><i>“in terms of the other disciplines, they look to us (OT) as an expert in this area, and there’s a very uncomfortable feeling” (Y3_P6)</i></p>                                    |
| <p>24 <b>Activation</b></p> <p>25 <u>Defining actions</u></p> <p>26 <i>Has the therapist taken</i></p> <p>27 <i>steps to sustain the use</i></p> <p>28 <i>of SENSe?</i></p>                                                                                                                | <p>Collectively defining the actions and procedures needed to sustain a practice and to stay involved.</p>                    | <p>Appropriate coding to this construct component:</p> <ul style="list-style-type: none"> <li>▪ The sustainability of SENSE</li> <li>▪ The visibility of SENSE in the organisation</li> <li>▪ The ongoing connection between SENSE and those who should use it</li> </ul>                                                                                                        | <p><i>“I just feel a bit unsure how it’s going to be carried out, and if it’s... sustainable across the service.” (O5_P3)</i></p> <p><i>“Handing that over to the AHA might not meet the criteria of the study, so I think.... once we have done the study, we might be able to think about using our AHAs a bit more effectively for that” (O5_P8)</i></p> |

35 **Construct 3: COLLECTIVE ACTION ‘Work done to enable the intervention to happen’**

36 **Collective Action** is the **operational work** that people do to enact a set of practices, whether these represent a new technology or complex healthcare intervention. *How far will existing work practices and the division of labour have to be changed or adapted to implement SENSe? Is SENSe consistent with the existing norms and goals of the groups, the workplace and overall organization?*

39 **\*\* Coding to this construct needs to involve a therapist talking about ‘doing’ or intended ‘doing’ related to using SENSE**

| Component | Definition | Guidance | Sample quotes |
|-----------|------------|----------|---------------|
|           |            |          |               |



|                                                                                                                                                                                                                                                                                                                                                  |                                                                                                                                           |                                                                                                                                                                                                                                                                                                                                                                                   |                                                                                                                                                                                                                                                                                                                                                                                                                                                                                                                                |
|--------------------------------------------------------------------------------------------------------------------------------------------------------------------------------------------------------------------------------------------------------------------------------------------------------------------------------------------------|-------------------------------------------------------------------------------------------------------------------------------------------|-----------------------------------------------------------------------------------------------------------------------------------------------------------------------------------------------------------------------------------------------------------------------------------------------------------------------------------------------------------------------------------|--------------------------------------------------------------------------------------------------------------------------------------------------------------------------------------------------------------------------------------------------------------------------------------------------------------------------------------------------------------------------------------------------------------------------------------------------------------------------------------------------------------------------------|
| <p>1 <b>Interactional workability</b></p> <p>2</p> <p>3 <i>Performing the actions</i></p> <p>4 <i>What work does the</i></p> <p>5 <i>therapist do with others</i></p> <p>6 <i>to operationalise</i></p> <p>7 <i>the use of the SENSE</i></p> <p>8 <i>approach?</i></p>                                                                           | <p>Interactional work people do to operationalize the practice in everyday settings</p>                                                   | <p>Appropriate coding to this construct component:</p> <ul style="list-style-type: none"> <li>▪ Interaction between therapists in the use of SENSE and SENSE equipment to put them into use</li> </ul> <p>Inappropriate coding to this domain:</p> <ul style="list-style-type: none"> <li>• Division of labour related to use of SENSE (code to Skill set Workability)</li> </ul> | <p><i>“that might be the benefit of this study that it...encourages co-assessments and co-treatments so that we’re both (OT &amp; PT) learning together really, which I think gives us benefit.” (L18_P3)</i></p> <p><i>“so I guess looking at across OT and physio how you can work together to try and implement the amount that you would need to, to change” (W7_P3)</i></p>                                                                                                                                               |
| <p>11 <b>Relational integration</b></p> <p>12</p> <p>13 <i>Working with and</i></p> <p>14 <i>trusting the work of</i></p> <p>15 <i>others (and SENSE as an</i></p> <p>16 <i>intervention)</i></p> <p>17 <i>To what extent does the</i></p> <p>18 <i>integration of SENSE</i></p> <p>19 <i>help or impede people’s</i></p> <p>20 <i>work?</i></p> | <p>Knowledge work people do to build accountability and maintain confidence in a set of practices and in each other as they use them.</p> | <p>Appropriate coding to this construct component:</p> <ul style="list-style-type: none"> <li>▪ The confidence therapists have in SENSE and its ability to detect and treat sensory loss in stroke survivors</li> </ul>                                                                                                                                                           | <p><i>“we would actually articulate and educate your patients well to try and do the [SENSE] principles, I hope then then yes, and the outcomes will be better” (O5_P9)</i></p>                                                                                                                                                                                                                                                                                                                                                |
| <p>24 <b>Contextual integration</b></p> <p>25</p> <p>26 <i>Allocating resources</i></p> <p>27 <i>Does the integration of</i></p> <p>28 <i>SENSE fit with the</i></p> <p>29 <i>objectives of the</i></p> <p>30 <i>organisation/</i></p> <p>31 <i>individual?</i></p>                                                                              | <p>Managing a set of practices through allocation of resources, execution of protocols, policies and procedures.</p>                      | <p>Appropriate coding to this construct component:</p> <ul style="list-style-type: none"> <li>▪ The management of the health service (staff, resources) to allow for delivery of SENSE</li> </ul>                                                                                                                                                                                 | <p><i>“you’re not going to spend a lot of time assessing someone if you can’t actually treat them...that would probably lead to someone thinking I’ll let that go for home-based therapy or outpatient therapy” (W7_P2)</i></p> <p><i>“we have grade one rotations and OTs who rotate every 6 months...obviously someone else who is going on maternity leave...if we have new people coming in that means we have to train them as well so that they can use the equipment so I guess can be a bit difficult” (Y3_P6)</i></p> |
| <p>39 <b>Skill set workability</b></p> <p>40 <i>Appropriate division of</i></p> <p>41 <i>tasks</i></p>                                                                                                                                                                                                                                           | <p>The allocation work that underpins the division of labour that is built up around a set of practices</p>                               | <p>Appropriate coding to this construct component:</p> <ul style="list-style-type: none"> <li>▪ Who does the work related to the</li> </ul>                                                                                                                                                                                                                                       | <p><i>“if it’s an assessment [SENSE] that both can do...if the physio is too busy the OT can help out or vice versa. We can all help with the time management side of things” [H17_P1]</i></p>                                                                                                                                                                                                                                                                                                                                 |

| <p>1 Who does the therapist<br/>2 view as being best<br/>3 placed to make use of<br/>4 the SENSE approach?<br/>5<br/>6 How compatible is the<br/>7 SENSE approach with<br/>8 their current tasks?</p>                                                                                                                                                                                                         |                                                                                                                                              | <p>use of SENSE?<br/><br/>*Related to Legitimation – see point on difference above</p>                                                                                                                                                                              | <p>“I’ll communicate with the OT and I would probably have a list of other priorities this big and I’ll go “Great! The OT can do this, one less thing for me to worry about!” (H4_P1)</p>                                                                                                                                   |
|---------------------------------------------------------------------------------------------------------------------------------------------------------------------------------------------------------------------------------------------------------------------------------------------------------------------------------------------------------------------------------------------------------------|----------------------------------------------------------------------------------------------------------------------------------------------|---------------------------------------------------------------------------------------------------------------------------------------------------------------------------------------------------------------------------------------------------------------------|-----------------------------------------------------------------------------------------------------------------------------------------------------------------------------------------------------------------------------------------------------------------------------------------------------------------------------|
| <p>9 <b>REFLEXIVE MONITORING</b> ‘formal and informal appraisal of benefits and costs of the intervention’</p>                                                                                                                                                                                                                                                                                                |                                                                                                                                              |                                                                                                                                                                                                                                                                     |                                                                                                                                                                                                                                                                                                                             |
| <p>10 <b>Reflexive Monitoring</b> is the <b>appraisal work</b> that people do to assess and understand the ways that a new set of practices affect them and others around them. <i>What is the</i><br/>11 <i>informal and formal appraisal of SENSE and its benefits for participants?</i><br/>12 <i>** Coding to this construct needs to involve a therapist reflecting on the ‘doing’/ use of SENSE</i></p> |                                                                                                                                              |                                                                                                                                                                                                                                                                     |                                                                                                                                                                                                                                                                                                                             |
| Component                                                                                                                                                                                                                                                                                                                                                                                                     | Definition                                                                                                                                   | Guidance                                                                                                                                                                                                                                                            | Sample quotes                                                                                                                                                                                                                                                                                                               |
| <p>15 <b>Systematization</b><br/>16<br/>17 <u>Collecting feedback</u><br/>18 <u>information</u><br/>19 <i>Has the therapist taken</i><br/>20 <i>practical steps to</i><br/>21 <i>measure the influence</i><br/>22 <i>of adopting the new</i><br/>23 <i>techniques?</i></p>                                                                                                                                    | <p>Collecting information to determine the effectiveness and utility of an intervention</p>                                                  | <p>Appropriate coding to this construct component:<br/> <ul style="list-style-type: none"> <li>▪ Formal (e.g. RCT) or informal (anecdotal) sources of information on how effective &amp; useful SENSE is</li> </ul> <p>From discussion with AM: e.g. audit</p> </p> | <p>“in my limited experience and treatment that I’ve used some of the SENSE practices with, I’ve had really significant outcomes so I’m keen to apply it more broadly I guess across the board rather than just the ones that are really severe...sensory issues and see what sort of outcomes we might have.” (W13_P2)</p> |
| <p>27 <b>Communal appraisal</b><br/>28 <u>Collectively evaluating</u><br/>29 <u>it</u><br/>30 <i>Are there any joint</i><br/>31 <i>efforts to appraise</i><br/>32 <i>the impact of</i><br/>33 <i>implementation?</i></p>                                                                                                                                                                                      | <p>Participants working together to evaluate the worth of a set of practices.</p>                                                            | <p>Appropriate coding to this construct component:<br/> <ul style="list-style-type: none"> <li>▪ Therapists asking each other ‘Is SENSE working?’</li> <li>▪ Communal appraisal of SENSE</li> </ul> </p>                                                            | <p>* Likely to be more relevant at end of implementation</p>                                                                                                                                                                                                                                                                |
| <p>35 <b>Individual appraisal</b><br/>36 <u>Individually evaluating</u><br/>37 <u>it</u><br/>38 <i>Does the therapist</i><br/>39 <i>reflect personally on the</i></p>                                                                                                                                                                                                                                         | <p>Participants working experientially as individuals to appraise the practice’s effects on them and the contexts in which they are set.</p> | <p>Appropriate coding to this construct component:<br/> <ul style="list-style-type: none"> <li>▪ Therapists individual appraisal of the worth of SENSE and the impact on other work tasks</li> </ul> </p>                                                           | <p>* Likely to be more relevant at end of implementation</p>                                                                                                                                                                                                                                                                |

44  
45  
46

|                                                                                                                                                                                                                                                                                             |                                                                                     |                                                                                                                                                                |                                                              |
|---------------------------------------------------------------------------------------------------------------------------------------------------------------------------------------------------------------------------------------------------------------------------------------------|-------------------------------------------------------------------------------------|----------------------------------------------------------------------------------------------------------------------------------------------------------------|--------------------------------------------------------------|
| <p>1 <i>impact of the SENSE</i><br/> 2 <i>approach on his/her</i><br/> 3 <i>routine?</i></p>                                                                                                                                                                                                |                                                                                     |                                                                                                                                                                |                                                              |
| <p>4 <b>Reconfiguration</b><br/> 5 <i>Changing the way</i><br/> 6 <i>things are done</i><br/> 7 <i>Has the therapist made</i><br/> 8 <i>attempts to</i><br/> 9 <i>modify the way the</i><br/> 10 <i>SENSe approach</i><br/> 11 <i>is used as a result of</i><br/> 12 <i>experience?</i></p> | <p>Appraisal work done by users to<br/> redefine procedures or modify practices</p> | <p>Appropriate coding to this construct<br/> component:<br/> ▪ Changes to the delivery of SENSE<br/> therapists make to allow it to fit with<br/> practice</p> | <p>* Likely to be more relevant at end of implementation</p> |

Structure and definitions in codebook guided by:

May C, Finch T. (2009). Implementing, embedding, and integrating practices: an outline of normalization process theory. *Sociology*, 43(3), 535-554.

Sutton E, Herbert G, Burden S, Lewis S, et al. (2018) Using the Normalization Process Theory to qualitatively explore sense-making in implementation of the Enhanced Recovery After Surgery programme: "It's not rocket science" PLoS ONE 13(4): e0195890.

Murray E, Treweek S, Pope C, MacFarlane A. et al. (2010). Normalisation process theory: a framework for developing, evaluating and implementing complex interventions. *BMC med*, 8(1), 63.

Alverbratt C, Carlström E, Åström S, Kauffeldt A et al. (2014). The process of implementing a new working method—a project towards change in a Swedish psychiatric clinic. *J Hosp Admin*, 3(6), 174.

Kennedy A, Rogers A, Chew-Graham C, Blakeman T et al. (2014). Implementation of a self-management support approach (WISE) across a health system: a process evaluation explaining what did and did not work for organisations, clinicians and patients. *Imp Sci*, 9(1), 129.

Clarke DJ, Hawkins R, Sadler E, Harding G et al. (2014). Introducing structured caregiver training in stroke care: findings from the TRACS process evaluation study. *BMJ Open*, 4(4), e004473.

McNaughton RJ, Steven A, Shucksmith J. (2019). Using Normalization Process Theory as a practical tool across the life course of a qualitative research project. *Qual health res*, 1049732319863420.

1  
2  
3  
4  
5  
6  
7  
8  
9  
10  
11  
12  
13  
14  
15  
16  
17  
18  
19  
20  
21  
22  
23  
24  
25  
26  
27  
28  
29  
30  
31  
32  
33  
34  
35  
36  
37  
38  
39  
40  
41  
42  
43  
44  
45  
46

For peer review only

## Appendix 4.

Study: Factors influencing allied health professionals' implementation of upper limb sensory rehabilitation for stroke survivors: A qualitative study to inform knowledge translation

### Number of quotes coded to Theoretical Domains Framework and Normalisation Process Theory domains and categories

*Theoretical Domains Framework (TDF):*

|                                                   | SITE   |        |        |        |        |        |        |        |
|---------------------------------------------------|--------|--------|--------|--------|--------|--------|--------|--------|
| TDF Domain                                        | Site 1 | Site 2 | Site 3 | Site 4 | Site 5 | Site 6 | Site 7 | Site 8 |
| <b>Knowledge</b>                                  | 5      | 3      | 7      | 7      | 13     | 6      | 15     | 13     |
| <b>Skills</b>                                     | 5      | 6      | 10     | 9      | 7      | 9      | 6      | 18     |
| <b>Social/Prof Role and Identity</b>              | 9      | 16     | 15     | 22     | 19     | 23     | 7      | 20     |
| <b>Beliefs about capabilities</b>                 | 4      | 3      | 4      | 1      | 8      | 12     | 4      | 12     |
| <b>Optimism</b>                                   | 3      | 8      | 7      | 3      | 8      | 1      | 14     | 11     |
| <b>Beliefs about consequences</b>                 | 7      | 7      | 4      | 12     | 3      | 6      | 15     | 17     |
| <b>Reinforcement</b>                              | 3      | 1      | 1      | 5      | 4      | 5      | 1      | 6      |
| <b>Intentions</b>                                 | 2      | 6      | 4      | 13     | 4      | 9      | 5      | 15     |
| <b>Goals</b>                                      | 5      | 6      | 4      | 4      | 7      | 5      | 0      | 10     |
| <b>Memory, attention &amp; decision processes</b> | 3      | 3      | 4      | 3      | 6      | 7      | 4      | 3      |
| <b>Environmental context and resources</b>        | 41     | 38     | 52     | 45     | 36     | 40     | 56     | 77     |
| <b>Social influences</b>                          | 9      | 6      | 8      | 4      | 10     | 24     | 13     | 11     |
| <b>Emotion</b>                                    | 8      | 1      | 8      | 7      | 5      | 9      | 4      | 14     |
| <b>Behavioural regulation</b>                     | 3      | 1      | 1      | 4      | 0      | 3      | 1      | 3      |

\* Green/shaded numbers indicate three domains coded to most frequently at each site

*Normalisation Process Theory (NPT):*

|                                | SITE   |        |        |        |        |        |        |        |
|--------------------------------|--------|--------|--------|--------|--------|--------|--------|--------|
| NPT Category and Construct     | Site 1 | Site 2 | Site 3 | Site 4 | Site 5 | Site 6 | Site 7 | Site 8 |
| <b>COHERENCE</b>               |        |        |        |        |        |        |        |        |
| Differentiation                | 6      | 3      | 10     | 7      | 7      | 4      | 17     | 10     |
| Individual specification       | 14     | 3      | 14     | 3      | 11     | 5      | 10     | 14     |
| Communal specification         | 5      | 3      | 7      | 8      | 6      | 4      | 7      | 10     |
| Internalisation                | 7      | 9      | 15     | 15     | 11     | 6      | 8      | 15     |
| <b>COGNITIVE PARTICIPATION</b> |        |        |        |        |        |        |        |        |
| Initiation                     | 4      | 8      | 6      | 8      | 5      | 4      | 10     | 5      |
| Enrolment                      | 4      | 4      | 5      | 3      | 6      | 11     | 6      | 9      |
| Legitimation                   | 15     | 10     | 14     | 11     | 12     | 11     | 14     | 16     |
| Activation                     | 2      | 0      | 4      | 8      | 6      | 2      | 2      | 5      |
| <b>COLLECTIVE ACTION</b>       |        |        |        |        |        |        |        |        |
| Interactional workability      | 4      | 1      | 3      | 1      | 4      | 0      | 3      | 7      |
| Relational integration         | 3      | 0      | 3      | 2      | 0      | 1      | 2      | 2      |
| Contextual integration         | 7      | 0      | 5      | 2      | 1      | 2      | 3      | 8      |

1  
2  
3  
4  
5  
6  
7  
8  
9  
10  
11  
12  
13  
14  
15  
16  
17  
18  
19  
20  
21  
22  
23  
24  
25  
26  
27  
28  
29  
30  
31  
32  
33  
34  
35  
36  
37  
38  
39  
40  
41  
42  
43  
44  
45  
46

|                       |   |   |   |   |   |   |   |   |
|-----------------------|---|---|---|---|---|---|---|---|
| Skill set workability | 5 | 0 | 1 | 2 | 0 | 3 | 1 | 0 |
| REFLEXIVE MONITORING  |   |   |   |   |   |   |   |   |
| Systematization       | 0 | 0 | 0 | 0 | 1 | 0 | 0 | 0 |
| Communal appraisal    | 0 | 0 | 0 | 0 | 0 | 0 | 0 | 0 |
| Individual appraisal  | 0 | 0 | 3 | 1 | 1 | 0 | 1 | 1 |
| Reconfiguration       | 0 | 0 | 0 | 0 | 0 | 0 | 0 | 0 |

\* Green/shaded numbers indicate three domains coded to most frequently at each site

For peer review only

## Consolidated criteria for reporting qualitative studies (COREQ): 32-item checklist

| No                                             | Item                                     | Guide Questions/Description                                                                                                                      | Reported on Page No. / Comment                                                                                                                                              |
|------------------------------------------------|------------------------------------------|--------------------------------------------------------------------------------------------------------------------------------------------------|-----------------------------------------------------------------------------------------------------------------------------------------------------------------------------|
| <b>Domain 1: Research team and reflexivity</b> |                                          |                                                                                                                                                  |                                                                                                                                                                             |
| <b>Personal Characteristics</b>                |                                          |                                                                                                                                                  |                                                                                                                                                                             |
| 1                                              | Interviewer/facilitator                  | Which author/s conducted the interview or focus group?                                                                                           | Page 7. Liana S Cahill (LSC) and Yvonne Mak-Yuen (YMY) conducted focus groups and interviews.                                                                               |
| 2                                              | Credentials                              | What were the researcher's credentials?                                                                                                          | Page 8. Credentials of LSC and YMY detailed under 'Research Team and Reflexivity'                                                                                           |
| 3                                              | Occupation                               | What was their occupation at the time of the study?                                                                                              | Page 8. LSC and YMY noted to be research occupational therapists under 'Research Team and Reflexivity'                                                                      |
| 4                                              | Gender                                   | Was the researcher male or female?                                                                                                               | Page 8. Researchers female as noted by female pronouns.                                                                                                                     |
| 5                                              | Experience and training                  | What experience or training did the researcher have?                                                                                             | Page 8. Professional training and background of researchers noted under 'Research Team and Reflexivity'                                                                     |
| <b>Relationship with participants</b>          |                                          |                                                                                                                                                  |                                                                                                                                                                             |
| 6                                              | Relationship established                 | Was a relationship established prior to study commencement?                                                                                      | Not for the purposes of the study. It is noted LSC previously worked with some participants, but not at the time of the study – see Page 8, 'Research Team and Reflexivity' |
| 7                                              | Participant knowledge of the interviewer | What did the participants know about the researcher? <i>e.g. personal goals, reasons for doing the research</i>                                  | Participants were aware LSC and YMY were completing their doctorates in somatosensory rehabilitation. See Page 8, 'Research Team and Reflexivity'.                          |
| 8                                              | Interviewer characteristics              | What characteristics were reported about the interviewer/facilitator? <i>e.g. Bias, assumptions, reasons and interests in the research topic</i> | Participants were likely aware of the interviewers' special interest in somatosensory rehabilitation stemming from                                                          |



|                               |                                       |                                                                                                                                                          |                                                                                                                                                            |
|-------------------------------|---------------------------------------|----------------------------------------------------------------------------------------------------------------------------------------------------------|------------------------------------------------------------------------------------------------------------------------------------------------------------|
|                               |                                       |                                                                                                                                                          | clinical practice. See Page 8, 'Research Team and Reflexivity'.                                                                                            |
| <b>Domain 2: study design</b> |                                       |                                                                                                                                                          |                                                                                                                                                            |
| <b>Theoretical framework</b>  |                                       |                                                                                                                                                          |                                                                                                                                                            |
| 9                             | Methodological orientation and Theory | What methodological orientation was stated to underpin the study? e.g. grounded theory, discourse analysis, ethnography, phenomenology, content analysis | Page 9-10. Thematic analysis and use of two theoretical frameworks (Theoretical Domains Theory and Normalisation Process Theory) is described.             |
| <b>Participant selection</b>  |                                       |                                                                                                                                                          |                                                                                                                                                            |
| 10                            | Sampling                              | How were participants selected? e.g. purposive, convenience, consecutive, snowball                                                                       | Page 8. Purposive recruitment of therapists to the study is described, see 'Participants'                                                                  |
| 11                            | Method of approach                    | How were participants approached? e.g. face-to-face, telephone, mail, email                                                                              | Page 8. Approach to health organisations via telephone and email and approach to therapists via face-to-face presentations described, see 'Participants'   |
| 12                            | Sample size                           | How many participants were in the study?                                                                                                                 | Page 10. Eighty seven occupational therapists and physiotherapists participated. See 'Findings'                                                            |
| 13                            | Non-participation                     | How many people refused to participate or dropped out? Reasons?                                                                                          | Page 8. All therapists attending recruitment presentations agreed to participate. No refusals or drop-outs occurred. See 'Participants'                    |
| <b>Setting</b>                |                                       |                                                                                                                                                          |                                                                                                                                                            |
| 14                            | Setting of data collection            | Where was the data collected? e.g. home, clinic, workplace                                                                                               | Page 7. Focus groups were held at therapists' health organisations. Separate interviews were held over the phone for those unable to attend. See 'Design'. |
| 15                            | Presence of non-participants          | Was anyone else present besides the participants and researchers?                                                                                        | Page 7. No. Two members of the research team (LSC and YMY) attended focus groups,                                                                          |

|                        |                        |                                                                                   |                                                                                                                                                                                                                                                                       |
|------------------------|------------------------|-----------------------------------------------------------------------------------|-----------------------------------------------------------------------------------------------------------------------------------------------------------------------------------------------------------------------------------------------------------------------|
|                        |                        |                                                                                   | no one else was present besides participants. See 'Design'.                                                                                                                                                                                                           |
| 16                     | Description of sample  | What are the important characteristics of the sample? e.g. demographic data, date | Page 8. Participants were graduate occupational therapists and physiotherapists who worked with stroke survivors at participating health organisations. See 'Participants'. A demographics table describing characteristics of participants is provided, see Table 1. |
| <b>Data collection</b> |                        |                                                                                   |                                                                                                                                                                                                                                                                       |
| 17                     | Interview guide        | Were questions, prompts, guides provided by the authors? Was it pilot tested?     | Page 7. Interview questions are provided in Appendix 1 and were guided by the Theoretical Domains Framework. Questions were not formally pilot tested but were discussed with the research group. See 'Design'.                                                       |
| 18                     | Repeat interviews      | Were repeat interviews carried out? If yes, how many?                             | Repeat interviews were not conducted, though individuals who missed original focus groups were followed up in individual or small group interviews.                                                                                                                   |
| 19                     | Audio/visual recording | Did the research use audio or visual recording to collect the data?               | Page 7. Interviews were audio-recorded. See 'Design'                                                                                                                                                                                                                  |
| 20                     | Field notes            | Were field notes made during and/or after the interview or focus group?           | Page 7. Field notes were taken during and after each interview. See 'Design'                                                                                                                                                                                          |
| 21                     | Duration               | What was the duration of the interviews or focus group?                           | Page 7. Focus groups were of 1-hour duration. See 'Design'.                                                                                                                                                                                                           |
| 22                     | Data saturation        | Was data saturation discussed?                                                    | Data saturation considered, n=87 therapists across 8 different health organisation was aimed to provide a representative sample                                                                                                                                       |

|                                 |                                |                                                                                                                                        |                                                                                                                                                                                                                              |
|---------------------------------|--------------------------------|----------------------------------------------------------------------------------------------------------------------------------------|------------------------------------------------------------------------------------------------------------------------------------------------------------------------------------------------------------------------------|
| 23                              | Transcripts returned           | Were transcripts returned to participants for comments and/or correction?                                                              | No. Given the workloads of therapists involved, participants were not expected to review transcripts. The interviewer and co-moderator (LSC & YMY) discussed transcripts and made comments and corrections.                  |
| Domain 3: analysis and findings |                                |                                                                                                                                        |                                                                                                                                                                                                                              |
| <b>Data analysis</b>            |                                |                                                                                                                                        |                                                                                                                                                                                                                              |
| 24                              | Number of data coders          | How many data coders coded the data?                                                                                                   | Pages 9-10. Three researchers were involved in data analysis (LSC, NAL and AM). See 'Data Analysis'                                                                                                                          |
| 25                              | Description of the coding tree | Did authors provide a description of the coding tree?                                                                                  | Codebooks used are provided in Appendices 2 and 3.                                                                                                                                                                           |
| 26                              | Derivation of the themes       | Were themes identified in advance or derived from the data?                                                                            | Pages 9-10. In Phase one, themes were derived from the data in an inductive approach, in Phase two, themes were deductively derived from pre-determined theories with specified domains and categories. See 'Data analysis'. |
| 27                              | Software                       | What software, if applicable, was used to manage the data?                                                                             | N/a                                                                                                                                                                                                                          |
| 28                              | Participant checking           | Did participants provide feedback on the findings?                                                                                     | Given the workloads of therapists involved, participants were not expected to provide feedback on findings.                                                                                                                  |
| <b>Reporting</b>                |                                |                                                                                                                                        |                                                                                                                                                                                                                              |
| 29                              | Quotations presented           | Were participant quotations presented to illustrate the themes/findings? Was each quotation identified? <i>e.g. participant number</i> | Page 13-25. Participant quotes used to illustrate findings. Participants identified by discipline (e.g. Occupational therapist or physiotherapist) and site number. See 'Findings'                                           |

|    |                              |                                                                        |                                                                                                                                                                            |
|----|------------------------------|------------------------------------------------------------------------|----------------------------------------------------------------------------------------------------------------------------------------------------------------------------|
| 30 | Data and findings consistent | Was there consistency between the data presented and findings?         | Page 25. Consistency in triangulation between data analysis approaches and findings provided and examples given. See 'Discussion'.                                         |
| 31 | Clarity of major themes      | Were major themes clearly presented in the findings?                   | Page 12. An overview of major themes, along with prominent domains and categories from implementation theory, provided. See Table 3. (Detail also provided in 'Findings'). |
| 32 | Clarity of minor themes      | Is there a description of diverse cases or discussion of minor themes? | Page 12. A description of sub-themes is provided. See Table 3 and additional detail in 'Findings' > subthemes.                                                             |

# BMJ Open

## Factors influencing allied health professionals' implementation of upper limb sensory rehabilitation for stroke survivors: A qualitative study to inform knowledge translation

|                                 |                                                                                                                                                                                                                                                                                                                                                                                                                                                                                                                                                                                                                                                                                                                                                                                                                                                                                                                                                                                                                                                                                                                                                                                                                                                                                                 |
|---------------------------------|-------------------------------------------------------------------------------------------------------------------------------------------------------------------------------------------------------------------------------------------------------------------------------------------------------------------------------------------------------------------------------------------------------------------------------------------------------------------------------------------------------------------------------------------------------------------------------------------------------------------------------------------------------------------------------------------------------------------------------------------------------------------------------------------------------------------------------------------------------------------------------------------------------------------------------------------------------------------------------------------------------------------------------------------------------------------------------------------------------------------------------------------------------------------------------------------------------------------------------------------------------------------------------------------------|
| Journal:                        | <i>BMJ Open</i>                                                                                                                                                                                                                                                                                                                                                                                                                                                                                                                                                                                                                                                                                                                                                                                                                                                                                                                                                                                                                                                                                                                                                                                                                                                                                 |
| Manuscript ID                   | bmjopen-2020-042879.R1                                                                                                                                                                                                                                                                                                                                                                                                                                                                                                                                                                                                                                                                                                                                                                                                                                                                                                                                                                                                                                                                                                                                                                                                                                                                          |
| Article Type:                   | Original research                                                                                                                                                                                                                                                                                                                                                                                                                                                                                                                                                                                                                                                                                                                                                                                                                                                                                                                                                                                                                                                                                                                                                                                                                                                                               |
| Date Submitted by the Author:   | 05-Jan-2021                                                                                                                                                                                                                                                                                                                                                                                                                                                                                                                                                                                                                                                                                                                                                                                                                                                                                                                                                                                                                                                                                                                                                                                                                                                                                     |
| Complete List of Authors:       | <p>Cahill, Liana; La Trobe University, Occupational Therapy, School of Allied Health, Human Services and Sport ; Australian Catholic University, Occupational Therapy, School of Allied Health</p> <p>Carey, Leeanne; La Trobe University, Occupational Therapy, School of Allied Health, Human Services and Sport; The Florey Institute of Neuroscience and Mental Health, Neurorehabilitation and Recovery, Stroke</p> <p>Mak-Yuen, Yvonne ; La Trobe University, Occupational Therapy, School of Allied Health, Human Services and Sport; The Florey Institute of Neuroscience and Mental Health, Neurorehabilitation and Recovery, Stroke</p> <p>McCluskey, Annie; The University of Sydney, Sydney School of Health Sciences, Faculty of Medicine and Health; The StrokeEd Collaboration</p> <p>Neilson, Cheryl; La Trobe University, Occupational Therapy, Rural Department of Allied Health, Rural Health School</p> <p>O'Connor, Denise; Cabrini Institute, Monash Department of Clinical Epidemiology; Monash University, Department of Epidemiology and Preventive Medicine, School of Public Health and Preventive Medicine</p> <p>Lannin, Natasha; Monash University, Department of Neuroscience, Central Clinical School ; Alfred Health, Allied Health (Occupational Therapy)</p> |
| <b>Primary Subject Heading</b>: | Health services research                                                                                                                                                                                                                                                                                                                                                                                                                                                                                                                                                                                                                                                                                                                                                                                                                                                                                                                                                                                                                                                                                                                                                                                                                                                                        |
| Secondary Subject Heading:      | Qualitative research                                                                                                                                                                                                                                                                                                                                                                                                                                                                                                                                                                                                                                                                                                                                                                                                                                                                                                                                                                                                                                                                                                                                                                                                                                                                            |
| Keywords:                       | Stroke < NEUROLOGY, REHABILITATION MEDICINE, Neurological injury < NEUROLOGY                                                                                                                                                                                                                                                                                                                                                                                                                                                                                                                                                                                                                                                                                                                                                                                                                                                                                                                                                                                                                                                                                                                                                                                                                    |
|                                 |                                                                                                                                                                                                                                                                                                                                                                                                                                                                                                                                                                                                                                                                                                                                                                                                                                                                                                                                                                                                                                                                                                                                                                                                                                                                                                 |

SCHOLARONE™  
Manuscripts



I, the Submitting Author has the right to grant and does grant on behalf of all authors of the Work (as defined in the below author licence), an exclusive licence and/or a non-exclusive licence for contributions from authors who are: i) UK Crown employees; ii) where BMJ has agreed a CC-BY licence shall apply, and/or iii) in accordance with the terms applicable for US Federal Government officers or employees acting as part of their official duties; on a worldwide, perpetual, irrevocable, royalty-free basis to BMJ Publishing Group Ltd ("BMJ") its licensees and where the relevant Journal is co-owned by BMJ to the co-owners of the Journal, to publish the Work in this journal and any other BMJ products and to exploit all rights, as set out in our [licence](#).

The Submitting Author accepts and understands that any supply made under these terms is made by BMJ to the Submitting Author unless you are acting as an employee on behalf of your employer or a postgraduate student of an affiliated institution which is paying any applicable article publishing charge ("APC") for Open Access articles. Where the Submitting Author wishes to make the Work available on an Open Access basis (and intends to pay the relevant APC), the terms of reuse of such Open Access shall be governed by a Creative Commons licence – details of these licences and which [Creative Commons](#) licence will apply to this Work are set out in our licence referred to above.

Other than as permitted in any relevant BMJ Author's Self Archiving Policies, I confirm this Work has not been accepted for publication elsewhere, is not being considered for publication elsewhere and does not duplicate material already published. I confirm all authors consent to publication of this Work and authorise the granting of this licence.

**Title: Factors influencing allied health professionals' implementation of upper limb sensory rehabilitation for stroke survivors: A qualitative study to inform knowledge translation**

**First author and Corresponding author:**

| Name and email                                                                               | Highest qualification | ORCID ID                                                                                  | Affiliations                                                                                                                                                                                                                                                                                                  |
|----------------------------------------------------------------------------------------------|-----------------------|-------------------------------------------------------------------------------------------|---------------------------------------------------------------------------------------------------------------------------------------------------------------------------------------------------------------------------------------------------------------------------------------------------------------|
| Liana S Cahill<br><a href="mailto:Liana.cahill@florey.edu.au">Liana.cahill@florey.edu.au</a> | MPH                   | <a href="https://orcid.org/0000-0002-1730-9843">https://orcid.org/0000-0002-1730-9843</a> | 1. Occupational Therapy, School of Allied Health, Human Services and Sport, La Trobe University, Australia<br><br>2. School of Allied Health, Australian Catholic University, Australia<br><br>3. Neurorehabilitation and Recovery, Stroke, The Florey Institute of Neuroscience and Mental Health, Australia |

**Co-authors:**

| Name and email                                                                                    | Highest qualification | ORCID ID                                                                                  | Affiliations                                                                                                                                                                                                                     |
|---------------------------------------------------------------------------------------------------|-----------------------|-------------------------------------------------------------------------------------------|----------------------------------------------------------------------------------------------------------------------------------------------------------------------------------------------------------------------------------|
| Leeanne M Carey<br><a href="mailto:L.Carey@latrobe.edu.au">L.Carey@latrobe.edu.au</a>             | PhD                   | <a href="https://orcid.org/0000-0001-6376-8613">https://orcid.org/0000-0001-6376-8613</a> | 1. Occupational Therapy, School of Allied Health Human Services and Sport, La Trobe University, Australia<br><br>2. Neurorehabilitation and Recovery, Stroke, The Florey Institute of Neuroscience and Mental Health, Australia  |
| Yvonne Mak-Yuen<br><a href="mailto:Yvonne.Makyuen@florey.edu.au">Yvonne.Makyuen@florey.edu.au</a> | B Occ Therapy (Hons)  | <a href="https://orcid.org/0000-0002-0476-1769">https://orcid.org/0000-0002-0476-1769</a> | 1. Occupational Therapy, School of Allied Health, Human Services and Sport, La Trobe University, Australia<br><br>2. Neurorehabilitation and Recovery, Stroke, The Florey Institute of Neuroscience and Mental Health, Australia |

|                                                                                                     |                   |                                                                                                  |                                                                                                                                                                                                                                                                                                               |
|-----------------------------------------------------------------------------------------------------|-------------------|--------------------------------------------------------------------------------------------------|---------------------------------------------------------------------------------------------------------------------------------------------------------------------------------------------------------------------------------------------------------------------------------------------------------------|
| <p>Annie McCluskey</p> <p>Annie.McCluskey@Sydney.edu.au</p>                                         | <p>PhD</p>        | <p><a href="https://orcid.org/0000-0002-9719-6657">https://orcid.org/0000-0002-9719-6657</a></p> | <p>1. Sydney School of Health Sciences, Faculty of Medicine and Health, The University of Sydney, Sydney, Australia</p> <p>2. The StrokeEd Collaboration, Sydney, Australia</p>                                                                                                                               |
| <p>Cheryl Neilson</p> <p><a href="mailto:C.Neilson@latrobe.edu.au">C.Neilson@latrobe.edu.au</a></p> | <p>Masters OT</p> | <p><a href="https://orcid.org/0000-0002-0479-4149">https://orcid.org/0000-0002-0479-4149</a></p> | <p>1. Occupational Therapy, Rural Department of Allied Health, Rural Health School, La Trobe University, Bendigo, Australia</p>                                                                                                                                                                               |
| <p>Denise A O'Connor</p> <p>Denise.OConnor@monash.edu</p>                                           | <p>PhD</p>        | <p><a href="https://orcid.org/0000-0002-6836-122X">https://orcid.org/0000-0002-6836-122X</a></p> | <p>1. Monash Department of Clinical Epidemiology, Cabrini Institute, Malvern, Australia</p> <p>2. Department of Epidemiology and Preventive Medicine, School of Public Health and Preventive Medicine, Monash University, Melbourne, Australia</p>                                                            |
| <p>Natasha A Lannin</p> <p>Natasha.Lannin@monash.edu</p>                                            | <p>PhD</p>        | <p><a href="https://orcid.org/0000-0002-2066-8345">https://orcid.org/0000-0002-2066-8345</a></p> | <p>1. Department of Neurosciences, Central Clinical School, Monash University, Melbourne, Australia</p> <p>2. Allied Health (Occupational Therapy), Alfred Health, Melbourne, Australia</p> <p>3. Occupational Therapy, School of Allied Health, Human Services and Sport, La Trobe University, Australia</p> |

10

11 **Abbreviated title:** *Implementation of post-stroke sensory rehabilitation: A qualitative study*

12

13

14 **Key words:** Occupational therapy, physical therapy, somatosensory disorders,  
15 implementation science, health services research, neurosciences

16

17 **Word Count:** 267 (Abstract)

18 5345 (Introduction, Procedures, Findings, Discussion)

19



1  
2  
3 20 **References:** 49  
4 21

5 22 **Tables:** 3  
6 23

7 24 **Appendices:** 4  
8 25  
9  
10  
11 26  
12

13 27 **ABSTRACT**  
14  
15  
16 28

17  
18 29 **Objectives** Somatosensory loss is common after stroke with one-in-two individuals affected.

19  
20 30 Although clinical practice guidelines recommend providing somatosensory rehabilitation, this  
21  
22 31 impairment often remains unassessed and untreated. To address the gap between guideline  
23  
24 32 recommendations and clinical practice, this study sought to understand the factors influencing  
25  
26 33 delivery of evidence-based upper limb sensory rehabilitation after stroke.  
27  
28

29 34 **Design** Qualitative study involving focus groups and interviews. Data analysis used an  
30  
31 35 inductive approach (thematic analysis) and deductive analysis using implementation theory  
32  
33 36 (the Theoretical Domains Framework and Normalisation Process Theory).  
34  
35

36 37 **Setting** Eight healthcare organisations in metropolitan and regional areas of Victoria and New  
37  
38 38 South Wales, Australia.  
39  
40

41 39 **Participants:** Eighty-seven rehabilitation therapists (79% occupational therapists and 21%  
42  
43 40 physiotherapists) were purposively sampled and participated in a knowledge translation study  
44  
45 41 with staggered recruitment from 2014 - 2018.  
46  
47

48 42 **Results:** Three types of factors influenced therapists' delivery of upper limb somatosensory  
49  
50 43 rehabilitation: individual ('*The uncertain, unskilled therapist*'), patient ('*Patient*  
51  
52 44 *understanding and priorities*') and organisational ('*System pressures and resources*').  
53  
54

55 45 Deductive analysis using implementation theory identified key determinants of practice  
56  
57 46 change, such as opportunities to consolidate new skills, the anticipated benefits of upskilling  
58  
59 47 as a therapy team and the work anticipated by therapists to incorporate a new somatosensory  
60

1  
2  
3 48 rehabilitation approach.  
4

5 49 **Conclusions:** Occupational therapists and physiotherapists hold valuable insights towards  
6  
7  
8 50 practice change in somatosensory rehabilitation from the ‘frontline’. Therapists experience  
9  
10 51 barriers to change including a lack of knowledge and skills, lack of resources and  
11  
12 52 organisational pressures. Facilitators for change were identified, including social support and  
13  
14 53 therapists’ perceived legitimacy in using new somatosensory rehabilitation approaches.  
15  
16  
17 54 Results will inform the design of a tailored implementation strategy to increase the use of  
18  
19 55 evidence-based somatosensory rehabilitation in Australia.  
20

21 56 **Trial registration:** Australian New Zealand Clinical Trials Registry  
22  
23  
24 57 (ACTRN12615000933550)  
25  
26  
27  
28  
29

30  
31  
32  
33  
34  
35  
36  
37  
38  
39  
40  
41  
42  
43  
44  
45  
46  
47  
48  
49  
50  
51  
52  
53  
54  
55  
56  
57  
58  
59  
60

#### Strengths and limitations of this study

##### Strengths:

- This study used a qualitative design with inductive and deductive data analysis guided by the Theoretical Domains Framework and Normalisation Process Theory to increase credibility of findings
- Participants (n=87) from eight different health organisations contributed to a representative sample of stroke rehabilitation therapists
- Three independent researchers were involved in data analysis to increase validity

##### Limitations:

- Focus groups included therapists with different levels of experience and seniority, which may have introduced a power differential during discussion and potential for response bias
- The perspectives of stroke survivors and health organisation managers were not included in this study

## 61 BACKGROUND

62 Somatosensation has been considered the most complex of the human senses<sup>1</sup> and includes  
63 pain, tactile discrimination, joint position sense and haptic object recognition. Half of all  
64 stroke survivors experience somatosensory loss<sup>2-5</sup> yet treatment for this impairment has been  
65 historically overlooked.<sup>6,7</sup> Research reveals a persistent evidence-practice gap in the area of  
66 somatosensory rehabilitation.<sup>8-10</sup> Somatosensory rehabilitation includes assessment of  
67 somatosensory loss and treatment of somatosensory modalities<sup>11</sup> by occupational therapists  
68 and physiotherapists. Their accurate detection of somatosensory deficits, such as impaired  
69 touch, proprioception or haptic object recognition, give stroke survivors an opportunity for  
70 treatment.

71 Standardised assessments are underutilised by occupational therapists and physiotherapists,  
72 with informal measures being more common.<sup>8</sup> Typical treatment for somatosensory loss  
73 focusses on compensation (such as providing education to avoid limb injury) with a lack of  
74 use of evidence-based treatments aimed at regaining somatosensory function.<sup>8</sup> These practices  
75 may discount stroke survivors' perceptions of somatosensory loss as being 'significant',  
76 'concerning', and having a negative impact on daily life: and promote a perception that the  
77 impairment cannot be treated.<sup>12-14</sup>

78  
79 Following the publication of a Cochrane review<sup>15</sup> evidence for somatosensory rehabilitation  
80 has increased.<sup>16</sup> A more recent systematic review found that discrimination retraining  
81 programmes may improve upper limb somatosensory impairment after stroke.<sup>11</sup> SENSE  
82 therapy is a discrimination retraining program for upper limb somatosensory loss and uses  
83 principles such as attentive exploration and calibration to remediate somatosensory function.<sup>16</sup>  
84 Stroke clinical guidelines recommend standardised assessment and sensory-specific treatment  
85 for somatosensory loss.<sup>17,18</sup> <sup>19</sup> However, clinical audits suggest that these recommendations

1  
2  
3 86 are not widely implemented.<sup>9</sup>  
4  
5  
6 87

7  
8 88 Factors contributing to the underuse of somatosensory assessment and treatment were  
9  
10 89 explored in one Australian study.<sup>20</sup> Occupational therapists and physiotherapists in this study  
11  
12 90 (n=172) based their assessment and treatment choices on prior knowledge and clinical  
13  
14 91 experience rather than research, as well as organisational factors such as time available and  
15  
16 92 patient length of stay.<sup>20</sup> Patient factors also influenced practice; somatosensory assessments  
17  
18 93 were often not completed if a stroke survivor did not raise loss of sensation as a concern, or  
19  
20 94 therapists believed that a patient could not participate in the assessment. These findings are  
21  
22 95 consistent with stroke rehabilitation more broadly where use of evidence in practice is  
23  
24 96 influenced by a lack of time, knowledge and staffing issues, and patient factors such as  
25  
26 97 prioritisation and safety.<sup>21</sup> There is a need for further research into factors that influence  
27  
28 98 clinical decision-making for stroke survivors with somatosensory loss.<sup>8,22</sup>  
29  
30  
31  
32  
33  
34

35 100 Doyle and Bennett<sup>23</sup> investigated clinical behaviour in somatosensory rehabilitation in a  
36  
37 101 survey of occupational therapists prior to delivering a workshop based on the Theory of  
38  
39 102 Planned Behaviour. Therapists reported a lack of knowledge and skills to deliver  
40  
41 103 somatosensory rehabilitation, and a lack of resources and time to locate evidence and use  
42  
43 104 unfamiliar assessments and treatments. The sample for this study was small (n=19), and  
44  
45 105 responses were limited to a self-report questionnaire. A more in-depth study is required,  
46  
47 106 involving perspectives from both occupational therapists and physiotherapists who provide  
48  
49 107 somatosensory rehabilitation to stroke survivors.  
50  
51  
52  
53

54 108  
55  
56 109 The aim of our study was to understand the barriers and enablers faced by occupational  
57  
58 110 therapists and physiotherapists in the implementation of somatosensory assessments and  
59  
60

1  
2  
3 111 interventions for stroke survivors, to provide an explanation of underlying mechanisms that  
4  
5 112 enhance or inhibit such implementation. As this study sought to explore barriers, enablers and  
6  
7 113 any other factors influencing implementation of somatosensory guidelines in practice, the use  
8  
9 114 of implementation theory was warranted.  
10  
11  
12  
13 115

14  
15 116 Implementation science is a field of study dedicated to methods for increasing use of research  
16  
17 117 in practice<sup>24</sup> and the use of theory is central to the field.<sup>25</sup> Theory helps provide a framework  
18  
19 118 for investigating influences on behaviour, and a process for guiding behaviour change  
20  
21 119 interventions.<sup>26</sup> Theoretical approaches in implementation science are often interdisciplinary,  
22  
23 120 drawing on fields of psychology, sociology and economics.<sup>27</sup> The theories applied in this  
24  
25 121 study were the Theoretical Domains Framework<sup>28</sup> and Normalisation Process Theory.<sup>29</sup> Use  
26  
27 122 of multiple theories, common in implementation research, provided an opportunity to view  
28  
29 123 barriers and enablers from different perspectives and avoid a ‘conceptual straight-jacket’.<sup>30</sup>  
30  
31 124 The Theoretical Domains Framework, based on psychological theory, offers a comprehensive,  
32  
33 125 synthesised lens to explore individual motivators and capabilities for change, and social and  
34  
35 126 environmental influences on behaviour<sup>31</sup>. Normalisation Process Theory provides an  
36  
37 127 alternative theoretical lens and is a sociological theory that considers work required by  
38  
39 128 individuals and groups to embed, or normalise, a new practice.  
40  
41  
42  
43  
44  
45 129

## 46 130 **PROCEDURE**

47  
48  
49 131 This qualitative study presents data from focus groups and interviews conducted with  
50  
51 132 occupational therapists and physiotherapists, to enable the development of a tailored  
52  
53 133 implementation strategy. A primary goal of the implementation strategy was to improve the  
54  
55 134 routine use of somatosensory assessments and interventions after stroke (Trial Registry  
56  
57 135 ACTRN12615000933550).<sup>32</sup>  
58  
59  
60

136

**Design**

We used a descriptive qualitative design to explore determinants of practice<sup>33</sup> and help explain and describe complex processes and behaviours. Data were collected at eight healthcare organisations using pre-implementation questionnaires and focus groups of one-hour duration. Two members of the research team (LSC and YMY) attended focus groups; LSC facilitated focus groups and YMY took notes about group interaction and non-verbal communication. If therapists were unable to attend the focus group, separate interviews (20-30 minutes duration) were held face-to-face or via telephone by LSC. Content of focus groups were not discussed in individual interviews. Focus group and interview questions were the same (Appendix 1), were open-ended and were informed by the Theoretical Domains Framework.<sup>28</sup>

148

**Participants**

Participating health organisations were recruited to the study through telephone and email contact, and face-to-face meetings with managers. All organisations were in Australia; seven in Victoria and one in New South Wales. Participants were graduate occupational therapists and physiotherapists working with stroke survivors in participating healthcare organisations. There was no minimum clinical experience level required for eligibility to participate. Participant recruitment occurred via an information session presented by LSC and YMY held at participating organisations where purposive sampling was used. All participants provided written informed consent to participate in the study (Ethics approval reference: H2013/04956 HREC/13/Austin/8).

159

160

1  
2  
3 161  
4  
5 162 **Research team and reflexivity**  
6  
7  
8 163 LSC acted as the facilitator for focus groups and interviews and was the primary coding-  
9  
10 164 researcher. YMY was the notetaker for focus groups. LSC is a neurological occupational  
11  
12 165 therapist with a Masters of Public Health and a university lecturer completing a doctorate on  
13  
14 166 knowledge translation in somatosensory rehabilitation. LSC completed workshop training on  
15  
16 167 focus group facilitation prior to leading the focus groups. YMY is an experienced  
17  
18 168 neurological occupational therapist, completing her doctorate on standardised assessment in  
19  
20 169 somatosensory rehabilitation. LSC had previously worked with some participants at four sites  
21  
22 170 but not at the time of the focus groups and interviews; YMY had not worked with any  
23  
24 171 participants previously. Both LSC and YMY have experience assessing and treating  
25  
26 172 somatosensory loss in stroke survivors, and have published and presented on somatosensation  
27  
28 173 in stroke at conferences. This interest in somatosensory rehabilitation may have been known  
29  
30 174 to participants and be a potential source of bias.  
31  
32  
33  
34  
35  
36  
37  
38  
39  
40  
41  
42  
43  
44  
45  
46  
47  
48

175  
176 NAL and AM were coding-researchers in this study. Both are experienced neurological  
177  
178 occupational therapists and senior researchers, who have been involved in the development of  
179  
180 stroke clinical guidelines and stroke implementation studies. NAL and AM were not involved  
181  
182 in data collection, and remained blind to the source of quotes they were coding.  
183  
184  
185

### 181 **Patient and Public Involvement**

182 Patients and/or the public were not directly involved in the design, recruitment or  
183  
184 implementation of this study. Consumer representatives are members of the broader SENSE  
185  
186 Implement Steering Committee, and regular reviews by consumers of the SENSE study  
187  
188 documents (policies and reports) are undertaken.  
189  
190

186

## 187 **Data analysis**

188 Focus groups and interviews were audio-recorded with participant consent and transcribed  
189 verbatim by authors (LSC and YMY). Field notes were taken during and after each focus  
190 group and interview. All organisations and participants were given a unique identifier. A two-  
191 staged approach to analysis was used to inductively identify key themes (Stage 1), then data  
192 were deductively coded against the Theoretical Domains Framework (TDF) and  
193 Normalisation Process Theory (NPT) (Stage 2) using a theory-informed approach. Two  
194 members of the research team conducted the analysis in each phase. Any discrepancies were  
195 resolved through discussion and review of the original transcripts.

### 197 Stage 1: Thematic Analysis

198 First an inductive approach was applied using thematic analysis to identify and interpret key  
199 themes.<sup>34,35</sup> Two researchers (LSC and AM) open coded a sample of transcripts (20%, three  
200 transcripts) line-by-line, then met regularly to develop and revise the coding framework. LSC  
201 analysed remaining transcripts with ongoing consultation with co-authors. An audit trail of  
202 discussions and decisions was kept, leading to resultant codes, categories and ultimate  
203 themes.

### 205 Stage 2: Analysis using the Theoretical Domains Framework and Normalisation Process

#### 206 Theory

##### 208 *Theoretical Domains Framework (TDF)*

209 A deductive analysis approach was then taken using the TDF.<sup>28</sup> LSC and NAL separately  
210 coded a sample of transcripts (20%, three transcripts) to relevant domains of the TDF and met



1  
2  
3 211 regularly to compare and discuss coding decisions. LSC analysed the remaining transcripts,  
4  
5 212 which were collated into domain codes, discussed and revised through an iterative process  
6  
7  
8 213 with NAL. See Appendix 2 for the TDF codebook.  
9

10 214

### 12 215 *Normalisation Process Theory (NPT)*

14 216 A complementary deductive analysis occurred using NPT (May & Finch, 2009).<sup>29</sup> Coding to  
15  
16  
17 217 NPT provided insights into how teams of therapists conceptualised somatosensory  
18  
19 218 rehabilitation. It is acknowledged NPT constructs need to be given their own working  
20  
21 219 definition for individual settings<sup>36</sup> to make NPT ‘at home’ in the context of the study (May et  
22  
23 220 al., 2020).<sup>37</sup> This process was completed through iterative discussion between LSC and AM  
24  
25 221 (See Appendix 3 for NPT codebook). LSC and AM separately coded a sample of transcripts  
26  
27 222 (20%, three transcripts) to categories and constructs of the NPT, followed by discussion. LSC  
28  
29 223 analysed the remaining transcripts, resultant category and construct codings were reviewed,  
30  
31 224 discussed and refined in meetings with AM.  
32  
33  
34

35 225

37 226 The coding frameworks and domains, categories and constructs in the second and third stages  
38  
39 227 of analysis were reviewed for agreement by LSC, NAL and AM.  
40  
41

42 228

## 44 229 **FINDINGS**

46 230 Eighty-seven occupational therapists and physiotherapists participated in focus groups and  
47  
48 231 interviews across eight healthcare organisations. Six organisations were public healthcare  
49  
50 232 organisations (government funded) and two sites were private (privately funded). Tables 1  
51  
52 233 and 2 outline participant and site characteristics.  
53  
54

55 234

56 235

57 236

58 237

59 238

60 239

Table 1. Characteristics of participants

| Characteristic                                                     | n = 87     |
|--------------------------------------------------------------------|------------|
| Sex, number female (%)                                             | 80 (92)    |
| Discipline, number (%)                                             |            |
| Occupational Therapist                                             | 69 (79)    |
| Physiotherapist                                                    | 18 (21)    |
| Highest Education Level, number (%)                                |            |
| Bachelor Degree                                                    | 72 (83)    |
| Coursework Masters                                                 | 8 (9)      |
| Research Masters                                                   | 6 (7)      |
| Not specified                                                      | 1 (1)      |
| Years of clinical experience (yrs), mean (SD)                      | 10.6 (2.1) |
| Years of experience working with stroke survivors (yrs), mean (SD) | 7.9 (3.5)  |

Table 2. Overview of organisations and participants in focus groups and interviews (Total participants n=87)

| Organisation | Type of health service and location <sup>^</sup> | Focus Groups                                 | Interviews                                 |
|--------------|--------------------------------------------------|----------------------------------------------|--------------------------------------------|
|              |                                                  | Number of participants (No. of focus groups) | Number of participants (No. of interviews) |
| 1            | Tertiary, Metropolitan                           | 10 (1)                                       | 1 (1)                                      |
| 2            | Tertiary, Metropolitan                           | 9 (1)                                        | 0 (0)                                      |
| 3            | Tertiary, Regional                               | 15 (2*)                                      | 0 (0)                                      |
| 4            | Tertiary, Metropolitan                           | 13 (2†)                                      | 0 (0)                                      |
| 5            | Tertiary, Metropolitan                           | 6 (1)                                        | 1 (1)                                      |
| 6            | Tertiary, Regional                               | 6 (1)                                        | 1 (1)                                      |
| 7            | Tertiary, Metropolitan                           | 12 (1)                                       | 0 (0)                                      |
| 8            | Tertiary, Metropolitan                           | 13 (2#)                                      | 0 (0)                                      |

<sup>^</sup> All organisations have dedicated rehabilitation services, engage in research and teaching and have affiliations with a university

\* First focus group = 12, second focus group = 3

† First focus group = 10, second focus group = 3

# First focus group = 6, second focus group = 7

Table 3 provides an overview of themes and codes in different analysis stages.

Table 3: Overview of themes and prominent codes

|                           | Phase 1:<br><i>Thematic coding</i>                                                                                 | Phase 2:<br><i>Theoretical Domains Framework</i>                                                                                                                                         | Phase 2:<br><i>Normalisation Process Theory</i>                                                                                                                                       |
|---------------------------|--------------------------------------------------------------------------------------------------------------------|------------------------------------------------------------------------------------------------------------------------------------------------------------------------------------------|---------------------------------------------------------------------------------------------------------------------------------------------------------------------------------------|
| <b>Inductive analysis</b> | Themes:                                                                                                            | Key domains:                                                                                                                                                                             | Key categories and constructs:                                                                                                                                                        |
|                           | (1) <i>The uncertain unskilled therapist</i>                                                                       | <b>Knowledge</b><br>[Whether or not the therapist has knowledge of evidence-based sensory rehabilitation and how to do it]                                                               | <b>Individual specification (Coherence)</b><br>[Does the therapist acknowledge their personal role in, and responsibility to use evidence-based sensory rehabilitation?]              |
|                           | Subtheme:<br><i>The importance of getting it right</i>                                                             | <b>Skills</b><br>[Whether or not the therapist has the ability and competence to provide evidence-based sensory rehabilitation]                                                          | <b>Internalisation (Coherence)</b><br>[Does the therapist identify any benefit from adopting evidence-based sensory rehabilitation? Therapist coming to a conclusion about its worth] |
|                           | (2) <i>The patient's understanding and priorities</i>                                                              | <b>Environmental context and resources</b><br>[Whether or not the therapist believes the environmental context – physical or cultural - supports delivery of sensory rehabilitation]     | <b>Legitimation (Cognitive Participation)</b><br>[Does the therapist believe it is appropriate for them to deliver evidence-based sensory rehabilitation?]                            |
|                           | Subthemes:<br><i>Needing to focus on patient goals</i><br><i>Helping the patient to understand somatosensation</i> | <b>Social professional role and identity</b><br>[Whether identity as an occupational therapist or physiotherapist influences whether they provide evidence-based sensory rehabilitation] |                                                                                                                                                                                       |
|                           | (3) <i>System pressures and resources</i>                                                                          | <b>Social influences</b><br>[Interpersonal processes causing therapists to change their thoughts, feelings or behaviours towards evidence-based sensory rehabilitation]                  |                                                                                                                                                                                       |
|                           | Subthemes:<br><i>Not having the right tools</i><br><i>Sharing or deferring professional roles</i>                  |                                                                                                                                                                                          |                                                                                                                                                                                       |
|                           |                                                                                                                    |                                                                                                                                                                                          |                                                                                                                                                                                       |
|                           |                                                                                                                    |                                                                                                                                                                                          |                                                                                                                                                                                       |
|                           |                                                                                                                    |                                                                                                                                                                                          |                                                                                                                                                                                       |

1  
2  
3 260 Phase 1: Thematic analysis  
4

5 261 Three main themes or factors, and associated sub-themes, were found to influence therapists'  
6  
7  
8 262 delivery of upper limb somatosensory rehabilitation: The uncertain unskilled therapist,  
9  
10 263 patient understanding and priorities, and system pressures and resources.  
11

12 264

13  
14  
15 265 *Theme one: The uncertain unskilled therapist*  
16

17 266 A key finding was a self-identified lack of knowledge, skill and confidence to deliver  
18  
19 267 somatosensory rehabilitation. Therapists expressed negative emotions related to these  
20  
21 268 experiences and were concerned about using new somatosensory approaches in the 'right'  
22  
23  
24 269 way. Therapists acknowledged they often had little awareness of standardised assessments:  
25

26 270

27  
28 271 *"It was realising there's...objective assessments...and not knowing any of them! So that's a*  
29  
30 272 *bit scary"* (P4, Physiotherapist, Site 1, focus group)  
31

32 273

33  
34  
35 274 Uncertainty about using assessment information to address sensory loss was also  
36  
37 275 acknowledged:  
38

39 276

40  
41  
42 277 *"I find that I tend to assess, but then I don't know what to do with that information."* (P1,  
43  
44 278 Occupational therapist, Site 5, focus group)  
45

46 279

47  
48 280 Therapists were aware of their limitations when required to deliver somatosensory  
49  
50 281 rehabilitation. They experienced various emotions including "guilt" and "frustration":  
51

52 282

53  
54 283 *"I feel a little bit guilty...about what I have been doing in the past. This...shows me how much*  
55  
56 284 *more I could have been doing"*(P3, Occupational Therapist, Site 5, focus group)  
57

58  
59 285  
60

1  
2  
3 286 Therapists expressed a lack of confidence related to somatosensory rehabilitation, which led  
4  
5 287 them to deprioritise this area of practice and focus on others:  
6  
7

8 288

9  
10 289 *“I find that it isn't a priority for me to assess...as I don't feel confident with it and it kind of*  
11  
12 290 *gets pushed to the left over time in the session” (P1, Occupational therapist, Site 2, focus*  
13  
14 291 *group)*

15  
16 292

17  
18 293 Subtheme: The importance of getting it right

19  
20 294 Therapists felt a weight of responsibility to change their practice, and use new knowledge and  
21  
22 295 skills appropriately to benefit patients:  
23  
24

25 296

26  
27 297 *“I think there's also that little bit of hesitation of something new.... am I going to do it right?”*  
28  
29 298 *(P5, Occupational therapist, Site 8, focus group 1)*

30  
31 299

32  
33 300 Lack of skill consolidation after upskilling in evidence-based sensory rehabilitation was a  
34  
35 301 concern to some therapists. Without consistency of practice some therapists worried they  
36  
37 302 might not be ready when the need for their somatosensory skills arose:  
38  
39

40  
41 303

42  
43 304 *“I also feel a little bit nervous...with doing this amazing training and there will be no-one to*  
44  
45 305 *use it on for 6 months... when I finally get to that client, will I be ready?” (P4, Occupational*  
46  
47 306 *therapist, Site 8, focus group 2)*

48  
49 307

50  
51 308 *Theme two: The patient's understanding and priorities*

52 309

53  
54 310 This theme encompassed therapists' perceptions of patient understanding of sensation, the  
55  
56 311 goals set in rehabilitation and the therapist's role in helping patients understand sensation.

57  
58 312 Therapists wanted to be guided by patients and set patient-centred goals, but highlighted a  
59  
60

1  
2  
3 313 lack of understanding about sensation by some stroke survivors. Sensation was seen as a  
4  
5 314 more abstract concept to patients when contrasted with physical deficits which were more  
6  
7  
8 315 easily described and understood:  
9

10 316  
11  
12 317 *“There’s often a confusion between motor and sensation.. sometimes they’ll say ‘My muscles*  
13  
14 318 *need to be stronger’ but when you test it’s very obvious that it’s not actually a motor issue,*  
15  
16 319 *it’s...more of a sensory impairment” (P3, Occupational therapist, Site 6, focus group)*  
17

18 320  
19  
20  
21 321 Patient priorities were often perceived to be in areas other than somatosensory rehabilitation,  
22  
23 322 particularly for inpatients:  
24

25 323  
26  
27  
28 324 *“From an inpatient perspective it’s [sensation] quite often... not the client’s priority” (P3,*  
29  
30 325 *Occupational therapist, Site 2, focus group)*  
31

32 326  
33  
34 327 Subtheme: Needing to focus on patient goals  
35

36 328 Goal setting, as a tenet of stroke rehabilitation, was proposed to guide therapists in practice.  
37  
38  
39 329 However, not all patients wanted to set ‘sensory-goals’ and this perception impacted on  
40  
41 330 therapists’ clinical decision-making to conduct somatosensory assessments and provide  
42  
43 331 subsequent treatment:  
44

45 332  
46  
47  
48 333 *“You can’t assess it (sensation) and treat it if it’s not their goal. It has to be goal driven”*  
49  
50 334 *(P1, Occupational therapist, Site 6, focus group)*  
51

52 335  
53  
54 336 Subtheme: Helping patients to understand somatosensation  
55

56 337 When patients lacked an understanding of sensation, many therapists believed it was part of  
57  
58  
59 338 their professional role to increase patients’ knowledge about the impact of somatosensory  
60

1  
2  
3 339 loss on upper limb function. Therapists at separate sites independently described the  
4  
5 340 importance of this role for giving patients a ‘lightbulb’ moment:  
6  
7  
8 341

9  
10 342 *“It’s not until you take time and assess and explain how that [sensation] would be affecting*  
11  
12 343 *the motor problems, and it’s almost like a light bulb for people...they haven’t had the words*  
13  
14 344 *to articulate it” (P12, Occupational therapist, Site 7, focus group)*  
15  
16 345

17  
18 346 Others mentioned that it suited therapists that patients often didn’t understand sensation and  
19  
20 347 prioritise this because they did not know how to deliver somatosensory rehabilitation  
21  
22 348 anyway:  
23  
24 349

25  
26 349  
27  
28 350 *“I do find myself wondering whether it’s a bit of a chicken and the egg situation...it kind of*  
29  
30 351 *suits us that sensory stuff is down the bottom but I’m not sure how that goes. Have we*  
31  
32 352 *articulated that to the patients, to try to help them to understand, or is that an accurate*  
33  
34 353 *reflection of the patient’s experience?” (P7, Occupational therapist, Site 8, focus group)*  
35  
36 354

37  
38  
39 355 *Theme three: System pressures and resources*  
40  
41 356

42  
43 357 This theme includes pressures experienced by therapists in their organisations, the lack of  
44  
45 358 resources to deliver somatosensory rehabilitation and sharing work responsibilities within a  
46  
47 359 rehabilitation team. Therapists across all sites described organisational factors that created  
48  
49 360 competing demands and reduced opportunities to provide somatosensory rehabilitation. There  
50  
51 361 was pressure, particularly on inpatient therapists, to facilitate discharge for patients and this  
52  
53 362 was perceived as highly valued by their organisation. This expectation often came at the  
54  
55 363 expense of providing upper limb somatosensory rehabilitation:  
56  
57 364

1  
2  
3 365 *“To facilitate someone to go home, or leaving the hospital is more highly valued [than*  
4  
5 366 *somatosensory rehabilitation]” (P2, Occupational therapist, Site 7, focus group)*

6  
7 367  
8  
9  
10 368 Therapists working in the community, rather than inpatient settings, were less affected by  
11  
12 369 hospital discharge pressures but still experienced competing demands related to their own,  
13  
14 370 rather than organisational expectations:

15  
16 371  
17  
18 372 *“I find I can’t really spend an hour just doing sensation...maybe half an hour doing sensation*  
19  
20 373 *and then all the return to work and everything else that’s going on, so...being able to dedicate*  
21  
22 374 *pure session for upper limb retraining is hard” (P8, Occupational therapist, Site 1, focus*  
23  
24 375 *group)*

25  
26  
27 376

28  
29 377 Subtheme: Not having the right tools

30  
31 378 Lack of appropriate equipment to assess and treat somatosensory deficits was a common  
32  
33 379 barrier for therapists. Disorganised equipment and tools were observed by some as a  
34  
35 380 representation of time and effort placed on somatosensory rehabilitation to date:

36  
37 381  
38  
39  
40 382 *“We have bits and pieces, scraps of stuff that we kind of throw together and we haven’t got*  
41  
42 383 *any formal, really good quality assessments or treatments, you know just hobbled together*  
43  
44 384 *stuff...so it kind of reflects the importance or...how much time we put into it” (P7,*  
45  
46 385 *Occupational therapist, Site 8 focus group 2)*

47  
48  
49 386

50  
51 387 Therapists, however, anticipated that having the right equipment would improve their  
52  
53 388 practice and skill development, and improve their confidence in delivering somatosensory  
54  
55 389 rehabilitation:

56  
57  
58 390 *“If you have the proper equipment, we will be more confident to use it and we’ll look more*  
59  
60



1  
2  
3 391 *professional too” (P6, Occupational therapist, Site 7, focus group)*  
4  
5 392

6  
7 393 Subtheme: Sharing or deferring professional roles  
8  
9

10 394 Occupational therapists and physiotherapists spoke of overlapping professional responsibility  
11  
12 395 in the delivery of somatosensory rehabilitation, and in some situations, sharing the workload.  
13  
14 396 More often, responsibility for upper limb somatosensory rehabilitation was assumed by the  
15  
16 397 occupational therapist. This role expectation was often related to physiotherapists’ workload  
17  
18 398 and the need to delegate to focus on other rehabilitation areas:  
19  
20

21 399  
22  
23 400 *“I’ll be the first to admit if I’ve got an OT working with my client at the same time, then I*  
24  
25 401 *won’t prioritise upper limb sensory” (P6, Physiotherapist, Site 6, focus group)*  
26  
27 402

28  
29  
30 403 Phase 2: Analysis using implementation theory  
31

32 404 An overview of coding to domains and categories of the TDF<sup>28</sup> and NPT<sup>29</sup> is provided in  
33  
34 405 Appendix 4.  
35  
36

37 406  
38  
39 407 *Analysis using The Theoretical Domains Framework*  
40

41 408 The domains coded most frequently were Knowledge, Skills, Environmental context and  
42  
43 409 resources, Social professional role and identity, and Social influences.  
44  
45

46 410  
47  
48 411 *Knowledge*  
49

50 412 In alignment with thematic coding, lack of knowledge about somatosensory rehabilitation  
51  
52 413 was frequently coded as a barrier to evidence-based practice. Procedural knowledge, a  
53  
54 414 construct of the Knowledge domain, prompted coding of sources of knowledge. Therapists  
55  
56 415 felt that their university education had often left them unprepared to provide somatosensory  
57  
58 416 rehabilitation:  
59  
60

1  
2  
3 417  
4  
5 418 *“When I went through university as well...I don’t think it was an area that I believe was well*  
6  
7 419 *taught at that time...I didn’t feel like I had a good grounding to even run with” (P4,*  
8  
9 420 *Occupational therapist, Site 6, focus group)*

10 421  
11  
12  
13  
14 422 Opportunities for development of somatosensory knowledge in the workplace were also  
15  
16 423 scarce for some therapists, as were opportunities to acquire skills by observing or asking  
17  
18 424 colleagues:

19  
20 425  
21  
22  
23 426 *“... it’s (sensory rehabilitation) not something that you can learn off a colleague ....This is not*  
24  
25 427 *an area where I can ask one of my more experienced colleagues about, it’s not something that*  
26  
27 428 *they would necessarily know” (P3, Occupational therapist, Site 8, focus group 2)*

28  
29 429  
30  
31 430 The TDF Knowledge domain also highlighted what therapists knew about the impact of  
32  
33 431 somatosensory loss on patients, and gaps in therapist knowledge:

34  
35 432  
36  
37  
38 433 *“... sometimes it’s hard for us to understand the impact of sensory loss. Motor loss you can*  
39  
40 434 *see the impact...but if they have functional upper limb but sensation is the main issue, I don’t*  
41  
42 435 *think we are as good at realising how much of an impact that could have” (P1, Occupational*  
43  
44 436 *therapist, Site 5, focus group)*

#### 45 46 47 437 48 49 438 *Skills*

50  
51 439 Coding to the Skills domain of the TDF highlighted a perceived skill gap and barrier to  
52  
53 440 evidence-based practice. The ability to develop and consolidate skills through exposure to  
54  
55 441 appropriate patients was seen as an enabler for sustaining skill levels:

56  
57 442  
58  
59  
60 443 *“...and to consolidate early so then it becomes second nature rather than lose all the*

1  
2  
3 444 *knowledge that we've learnt" (P3, Occupational therapist, Site 1, focus group)*

4  
5 445

6  
7 446 Coding to this domain also highlighted the need for specialised skills when working with  
8  
9 447 stroke survivors with common post-stroke deficits such as aphasia or cognitive impairment  
10  
11 448 who needed somatosensory rehabilitation:

12  
13 449

14  
15 450 *"Clients that do have communication impairments is the other one...how do I get them to talk*  
16  
17 451 *this out?...in the past we've done some comparisons with things but if they don't have the*  
18  
19 452 *language, I really don't know what to do" (P6, Occupational therapist, Site 8, focus group 2)*

20  
21 453

22  
23 454 *Environmental context and resources*

24  
25 455 Within this TDF domain, the constructs of environmental stressors, resources and person  
26  
27 456 versus environment interactions were most relevant. Environmental stressors were  
28  
29 457 recognised most by inpatient therapists and corresponded with findings in thematic coding  
30  
31 458 (see 'System pressures and resources'). Resources referred to equipment and physical spaces  
32  
33 459 that were needed to deliver somatosensory rehabilitation, including quiet rooms to facilitate  
34  
35 460 sustained attention on assessments and therapy:

36  
37 461

38  
39 462 *"To get to a private space or a quiet space to do the assessment or to have the equipment*  
40  
41 463 *somewhere easy in a quiet space, that might be a physical barrier" (P3, Physiotherapist, Site*  
42  
43 464 *3, focus group 2)*

44  
45 465

46  
47 466 Theoretically, the workplace provided a supportive culture for evidence-based practice, but  
48  
49 467 practically, implementation was often left up to individual therapists:

50  
51 468

52  
53 469 *"Quite often it feels like it's up to individual therapists to – which make sense – to bring on*  
54  
55 470

1  
2  
3 470 *change...but in order to do that ....requires a lot of ...energy and effort. And so the*  
4  
5 471 *organisation embraces it but not necessarily enables it to happen easily”(P3, Occupational*  
6  
7 472 *therapist, Site 6, focus group).*  
8

9 473

#### 11 474 *Social professional role and identity*

12  
13  
14 475 Therapists commented on two predominant areas within this TDF domain: their own  
15  
16 476 professional role and identity, and their organisation’s identity or ‘brand’ and how these  
17  
18 477 factors influenced their perspective and practice. Physiotherapists mentioned that they would  
19  
20 478 often defer upper limb sensory rehabilitation to occupational therapists (as per thematic  
21  
22 479 coding, ‘*System pressures and resources*’, subtheme ‘*Sharing and deferring professional*  
23  
24 480 *roles*’). Occupational therapists communicated that although upper limb sensory  
25  
26 481 rehabilitation was a part of their job and assumed expertise, it was not a role they were  
27  
28 482 always comfortable with:  
29

30 483

31  
32  
33  
34 484 *“In terms of the other disciplines, they look to us (OT) as an expert in this area, and there’s a*  
35  
36 485 *very uncomfortable feeling” (P7, Occupational therapist, Site 8, focus group 2)*  
37  
38

39 486

40  
41 487 Organisational identity was also mentioned as an enabler by therapists at organisations which  
42  
43 488 aspired to high-quality healthcare, for example, through involvement in research and delivery  
44  
45 489 of evidence-based practice. Therapists felt that this quality ‘brand’ aligned with their own  
46  
47 490 desire to provide evidence-based stroke rehabilitation and justified their efforts to implement  
48  
49 491 somatosensory rehabilitation:  
50

51 492

52  
53  
54 493 *“We’ve got a very strong commitment to...using evidence-based practice, and keeping*  
55  
56 494 *abreast of new research and new techniques that are coming out”(P1, Physiotherapist, Site 1,*  
57  
58 495 *interview)*  
59  
60

1  
2  
3 496  
45 497 *Social influences*6  
7  
8 498 Interpersonal processes had an impact on therapists' delivery of somatosensory rehabilitation.9  
10 499 This influence was exerted by work colleagues, either peers or managers, or patients.11  
12 500 Colleagues supported practice change. The intended team training was anticipated to be13  
14 501 beneficial, in contrast to individuals attending a professional development training session15  
16 502 and trying to effect change:17  
18  
19 50320  
21 504 *"It will be really helpful having so many therapists who actually know how to do it [sensory*  
22  
23 505 *rehabilitation]...we can spur each other on and to get each other to do it" (P9, Occupational*  
24  
25 506 *therapist, Site 7, focus group)*26  
27  
28 50729  
30 508 Patients also influenced whether somatosensory rehabilitation was provided or not.31  
32 509 Community-based therapists expressed that a precedent could be set when therapy was33  
34 510 provided during inpatient rehabilitation. However, if somatosensory impairments were not35  
36 511 identified and/or treated there, patients may not want to focus on sensory rehabilitation:37  
38  
39 51240  
41 513 *"What they've [patient] been focused on as an inpatient often comes with them... 'I worked on*  
42  
43 514 *this while I was in hospital, I want to keep working on it' ...so introducing those new things*  
44  
45 515 *[sensory rehabilitation] can also be a challenge" (P10, Occupational therapist, Site 1, focus*  
46  
47 516 *group)*48  
49  
50 51751  
52 518 Therapists found some patients were well-informed about treatment options and wanted to53  
54 519 pursue evidence-based rehabilitation:55  
56  
57 52058  
59 521 *"I'm finding that some patients are very savvy and have read up a lot about things and they*  
60

1  
2  
3 522 *will actually say ‘Are you doing this treatment technique?’ ...I’ve had a couple of people*  
4  
5 523 *who...have asked for some of the sensory things” (P8, Occupational therapist, Site 2, focus*  
6  
7 524 *group)*

8  
9 525

10  
11  
12 526 *Analysis using Normalisation Process Theory*

13  
14 527 Constructs most frequently used were Coherence, including Individual specification and

15  
16 528 Internalisation, and Cognitive Participation, specifically the construct of Legitimation.

17  
18 529 Coherence refers to work done to make sense of using a new practice, whereas Cognitive

19  
20 530 participation refers to relational work done to build enrolment and engagement in a new

21  
22 531 practice.<sup>29</sup>

23  
24  
25 532

26  
27  
28 533 *Coherence: Individual Specification*

29  
30 534 Individual specification in this study related to therapists’ understanding of their personal

31  
32 535 roles and responsibilities related to evidence-based somatosensory rehabilitation. Therapists

33  
34 536 were aware that they needed to move forward from previous practice patterns to incorporate

35  
36 537 something new:

37  
38  
39 538

40  
41 539 *“Just breaking what’s old habits and changing practice and not defaulting to what’s easy*

42  
43 540 *when we are feeling pressured and busy and tired....” (P10, Occupational therapist, Site 1,*

44  
45 541 *focus group)*

46  
47  
48 542

49  
50 543 Therapists also recognised their role in learning new skills related to equipment use and also

51  
52 544 providing therapy that required a high level of mastery of therapy techniques:

53  
54 545

55  
56 546 *“More just that translating that training [in sensory rehabilitation] to then mastering that skill*

57  
58 547 *and remembering it” (P1, Occupational therapist, Site 6, interview)*

59  
60

1  
2  
3 548  
45 549 *Coherence: Internalisation*

7  
8 550 Internalisation in this study referred to therapists' understanding of the value and benefit of  
9  
10 551 using new evidence-based somatosensory rehabilitation approaches, and coming to a  
11  
12 552 conclusion about the practice.<sup>38</sup> Most therapists held positive views about the effectiveness of  
13  
14 553 the new approach and how it would add to their repertoire of skills:

15  
16  
17 554

18  
19 555 *"The impression that the treatment approach works so that is what I'm basing my enthusiasm*  
20  
21 556 *on, that it is actually going to improve people's sensation and translate into their function."*

22  
23 557 *(P5, Occupational therapist, Site 2, focus group)*

24  
25 558

26  
27  
28 559 Therapists at some sites observed colleagues using new somatosensory rehabilitation  
29  
30 560 approaches, which contributed to conclusions drawn about the approach:

31  
32 561

33  
34 562 *"I can see the difference in the results as well that people who get SENSE training get"* (P8,  
35  
36 563 *Occupational therapist, Site 7, focus group)*

37  
38 56439  
40  
41 565 *Cognitive Participation: Legitimation*

42  
43 566 Legitimation in this study referred to therapists' beliefs about whether or not it was  
44  
45 567 appropriate for them to be involved with the new evidence-based sensory rehabilitation  
46  
47 568 approach, in their particular context. Some therapists believed that the evidence base for  
48  
49 569 somatosensory rehabilitation legitimised their future use of it, and helped support the  
50  
51 570 anticipated time required to change practice:

52  
53 571

54  
55  
56 572 *"Because there's evidence behind this program already...there's a bit more weight to it in*  
57  
58 573 *terms of when you are selling it to other health professionals or to our clients and their*

59  
60

1  
2  
3 574 *families in terms of how much time is needed” (P2, Occupational therapist, Site 5, focus*  
4  
5 575 *group)*

6  
7 576

8  
9  
10 577 Therapists from an inpatient setting wondered how their patients would participate in the  
11  
12 578 therapy. Some believed this area of practice was more suitable for use by their community-  
13  
14 579 based colleagues:

15  
16 580

17  
18  
19 581 *“I’m not sure how well received the treatment would be with all of our patients” (P1,*  
20  
21 582 *Occupational therapist, Site 5, focus group)*

22  
23 583

24  
25 584 Some therapists felt that somatosensory rehabilitation was considered to be an assumed skill  
26  
27 585 by managers, which justified their involvement in, and use of the new rehabilitation  
28  
29 586 approach:

30  
31 587

32  
33  
34 588 *“I don’t necessarily think we would have...barriers put up by our direct managers....I think to*  
35  
36 589 *a degree they’d already expect us to be doing this as part of our jobs” (P7, Occupational*  
37  
38 590 *therapist, Site 1, focus group)*

39  
40 591

41  
42  
43 592 The need for extensive one-to-one therapy as part of this new approach, which required  
44  
45 593 ‘hands-on’ intervention, was felt to be at odds with current practice at one site, and a potential  
46  
47 594 barrier to practice change, with therapists stating that:

48  
49 595

50  
51  
52 596 *“There is a move for...more self-directed [therapy]...the patient taking ownership of their*  
53  
54 597 *problem and working on that themselves, rather than you sitting down one-on-one” (P10,*  
55  
56 598 *Physiotherapist, Site 3, focus group 1)*

57  
58 599

59  
60



1  
2  
3 600 Finally, therapists talked about the importance of goal-directed rehabilitation and felt that  
4  
5 601 SENSE therapy was aligned with this principle:  
6  
7  
8 602

9  
10 603 *“It’s a goal-based service...the client has a lot of input into their...rehabilitation...by having*  
11  
12 604 *really specific goals. So it’s helpful that SENSE is very goal orientated as well.” (P9,*  
13  
14 605 *Occupational therapist, Site 7, focus group)*  
15  
16 606  
17  
18 607

## 20 608 **DISCUSSION**

21  
22  
23 609 Findings suggest three main factors influencing delivery of upper limb somatosensory  
24  
25 610 rehabilitation by therapists: individual therapist factors (*‘The uncertain unskilled therapist’*),  
26  
27 611 patient factors (*‘The patient’s understanding and priorities’*) and organisational factors  
28  
29 612 (*‘System pressures and resources’*). This study used a multi-phased approach for analysis,  
30  
31 613 including both psychological and sociological implementation theories. Initial inductive  
32  
33 614 analysis allowed a data-driven exploratory approach before use of a deductive analysis  
34  
35 615 mapped data to pre-determined theoretical constructs. Implementation theory highlighted key  
36  
37 616 determinants of practice, such as opportunities for practice to consolidate new skills (TDF  
38  
39 617 domain ‘Skills’), the anticipated benefits of upskilling as a therapy team (TDF domain  
40  
41 618 ‘Social influence’), and the tendency of physiotherapists to defer to occupational therapists  
42  
43 619 for upper limb somatosensory rehabilitation (TDF domain ‘Social Professional role and  
44  
45 620 identity’). NPT highlighted the work anticipated and required by therapists, including the  
46  
47 621 time and effort, to incorporate a new approach into practice and learn practical aspects of  
48  
49 622 equipment use. This phased approach to analysis has previously been used in implementation  
50  
51 623 research<sup>39</sup> and avoids theoretical ‘blindness’ resulting from a single method.<sup>25</sup>  
52  
53  
54  
55  
56  
57  
58  
59  
60

624  
625 Given the known evidence-practice gaps in somatosensory rehabilitation,<sup>8,40</sup> it is

1  
2  
3 626 unsurprising that knowledge and skill barriers were prominent, consistent with previous  
4  
5 627 studies.<sup>20,41</sup> Patient factors were rightfully important to therapists. Therapists wanted to be  
6  
7 628 directed by patients about their stroke rehabilitation goals, but acknowledged that sensation  
8  
9 629 was a poorly understood, abstract concept for many patients. For that reason, patients often  
10  
11 630 did not raise sensation as an issue nor set 'sensory goals'. A cycle of patient non-inquiry and  
12  
13 631 therapist non-delivery of somatosensory rehabilitation was suggested, which may be  
14  
15 632 important to address during implementation. Interestingly, therapists sometimes delineated  
16  
17 633 between 'sensory goals' that were impairment based and 'functional goals' which were not,  
18  
19 634 without noting the association between somatosensory capacities and occupational  
20  
21 635 performance.<sup>42,43</sup>  
22  
23  
24  
25  
26  
27  
28  
29  
30  
31  
32  
33  
34  
35  
36  
37  
38  
39  
40  
41  
42  
43  
44  
45  
46  
47  
48  
49  
50  
51  
52  
53  
54  
55  
56  
57  
58  
59  
60

636  
637 The role of physiotherapists in somatosensory rehabilitation was also explored through this  
638 research. Although the proportion of physiotherapists in the sample was relatively small  
639 (21%), one theme that was evident across several sites was that occupational therapists  
640 assumed the primary role for upper limb somatosensory rehabilitation, with physiotherapists  
641 focused on other areas such as mobility retraining. This finding has potential implications for  
642 involving physiotherapists in somatosensory rehabilitation and tailored strategies for  
643 behaviour change, such as training, persuasion and modelling, are likely required<sup>44</sup>.

644  
645 Organisational pressures were felt strongly by therapists. Inpatient therapists were  
646 particularly influenced by discharge pressures. This pressure often compromised their ability  
647 to provide upper limb rehabilitation. Some therapists suggested that it might not be feasible  
648 for them to deliver somatosensory rehabilitation in their inpatient setting. This finding is  
649 similar to other studies where discharge pressure influenced provision of rehabilitation.<sup>45,46</sup>  
650 Social influences from colleagues and patients were identified as both enabling and hindering

1  
2  
3 651 factors for change. Therapists held positive views about anticipated implementation efforts  
4  
5 652 that would be directed towards them as a group rather than individuals. They perceived  
6  
7  
8 653 benefits of upskilling the whole therapy team and working together to use a new therapy  
9  
10 654 approach.

11 655

12  
13  
14 656 Implementation theory helped to further elucidate perceptions towards changing practice and  
15 657 factors influencing translation. Mapping to domains of the TDF and NPT revealed common  
16  
17 658 data points for triangulation, a layered understanding of themes, and new factors influencing  
18  
19 659 the implementation of evidence-based somatosensory rehabilitation not apparent during  
20  
21 660 initial coding. An example of intersection between theoretical approaches used in this study  
22  
23  
24 661 was between the NPT category of '*Coherence: Internalisation*' and the TDF domain of  
25  
26 662 '*Beliefs about consequences*'. Therapists' positive views towards the new somatosensory  
27  
28  
29 663 intervention and its effectiveness were mapped to both of these components. Similarly, the  
30  
31 664 TDF domain of '*Social Professional Role and Identity*' was found to align with the NPT  
32  
33 665 category of '*Cognitive Participation: Legitimation*' in therapists' belief the intervention may  
34  
35  
36 666 be more suitable for community-based therapists.

37 667

38  
39  
40  
41  
42 668 Two other studies have used both the TDF and NPT to explore implementation issues<sup>47,48</sup>  
43  
44 669 and multiple studies have applied more than one implementation theory.<sup>49</sup> This study  
45  
46  
47 670 mapped data to implementation theory, improving our understanding of factors which  
48  
49 671 influence practice change, such as professional identity and work anticipated by therapists to  
50  
51 672 embed a new therapy. The findings in this study will be used to further tailor implementation  
52  
53 673 strategies in the SENSE Implement knowledge translation study<sup>32</sup>. Improved understanding of  
54  
55  
56 674 key determinants of practice change suggest the value of individual consolidation of skills in  
57  
58 675 somatosensory rehabilitation, upskilling as a therapy team, and organisational support for  
59  
60

1  
2  
3 676 resources and change.  
4  
5  
6 677  
7  
8 678  
9

### 10 679 **Strengths and limitations**

12 680 There were several strengths of the study design and methods. First, the use of multi-phased  
13  
14 681 analysis and implementation theory can heighten the sensitivity of researchers to  
15  
16 682 interpretations that may not occur using inductive analysis alone<sup>36</sup>. Second, the number of  
17  
18 683 health professionals (n=87) across eight different health organisations provided a  
19  
20 684 representative sample of stroke rehabilitation therapists. Therapists unable to attend initial  
21  
22 685 focus groups were followed up in individual interviews, allowing part-time therapists, and  
23  
24 686 those in senior roles with family/carer responsibilities to participate. Their perspectives were  
25  
26 687 valued. Limitations of this study include the fact that participating health organisations were  
27  
28 688 largely selected by the research team. Furthermore, management personnel within these  
29  
30 689 organisations may have influenced which therapists participated in the study. These factors  
31  
32 690 may have introduced sampling bias and influenced findings. In addition, therapists with  
33  
34 691 different levels of experience and seniority participated in the focus groups, introducing a  
35  
36 692 possible power differential within the group, and potential response bias. Finally, the  
37  
38 693 perspectives of stroke survivors and health organisation managers were not included in this  
39  
40 694 study; these viewpoints may have provided a more comprehensive analysis of the barriers  
41  
42 695 and enablers of somatosensory rehabilitation.  
43  
44  
45  
46  
47  
48  
49  
50

### 51 697 **Conclusions**

53 698 This study used focus groups and interviews to explore the perspectives of occupational  
54  
55 699 therapists and physiotherapists and found individual, patient and organisational factors  
56  
57 700 influence the delivery of evidence-based somatosensory rehabilitation with stroke survivors.  
58  
59  
60

1  
2  
3 701 Therapists experience barriers to change including a lack of knowledge and skills, lack of  
4  
5 702 resources and organisational pressures. Facilitators for change were identified, including  
6  
7 703 social support and therapists' perceived legitimacy in using new somatosensory rehabilitation  
8  
9 704 approaches. The theoretical lens used in this study will guide implementation during the  
10  
11 705 SENSE Implement study, a project aimed at increasing the use of an evidence-based sensory  
12  
13 706 discrimination program.<sup>16</sup>  
14  
15  
16  
17  
18  
19  
20  
21  
22  
23  
24  
25  
26  
27  
28  
29  
30  
31  
32  
33  
34  
35  
36  
37  
38  
39  
40  
41  
42  
43  
44  
45  
46  
47  
48  
49  
50  
51  
52  
53  
54  
55  
56  
57  
58  
59  
60

For peer review only

1  
2  
3 708 **Ethics Committees approval:**  
4

5 709 Ethical approval for this study was granted by the Austin Health Human Research  
6  
7  
8 710 Ethics Committee (Reference: H2013/04956 HREC/13/Austin/8) and La Trobe University  
9  
10 711 (Reference FHEC 14/243). Site specific ethics approval was obtained for all participating  
11  
12 712 sites.  
13  
14

15 713  
16  
17 714 **Acknowledgements:**  
18

19 715 We acknowledge and thank the occupational therapists and physiotherapists who participated  
20  
21 716 in this study.  
22  
23

24 717  
25  
26 718 **Funding:**  
27

28 719 We acknowledge support for conduct of the research from the National Health and Medical  
29  
30 720 Research Council of Australia partnership grant: A network of sites and ‘up-skilled’  
31  
32 721 therapists to deliver best practice stroke rehabilitation of the upper limb (GNT 1134495).  
33  
34 722 LSC was supported by an Australian Government Research Training Program Scholarship.  
35  
36 723 NAL was supported by a Future Leader Fellowship (102055) from the National Heart  
37  
38 724 Foundation of Australia. DAO is supported by a NHMRC Translating Research into Practice  
39  
40 725 Fellowship (GNT 1168749).  
41  
42  
43  
44  
45  
46  
47  
48

49 728 **Competing interests:**  
50

51 729 LMC is the lead author of the SENSE approach to sensory rehabilitation, the focus of  
52  
53 730 knowledge translation in the SENSE Implement project. A SENSE training package (manual  
54  
55 731 and DVD) has been developed and is available for purchase from a Not for Profit  
56  
57 732 organisation. SENSE assessment and training equipment are also available for purchase.  
58  
59  
60

1  
2  
3 733 LMC has no personal financial interest in the sale of these resources. There is no patent, or  
4  
5 734 intended application for a patent, associated with these resources. LMC has conducted  
6  
7  
8 735 workshops on the SENSE approach and been invited to give lectures and conference  
9  
10 736 presentations on the approach. All other authors declare no competing interests.  
11  
12

13 737

14  
15 738 **Author Contribution:**

16  
17 739 LSC, LMC and NAL conceptualised the study. LSC and YMY conducted focus groups and  
18  
19 740 individual interviews. LSC, LMC, NAL, DAO, CN and AM discussed and determined the  
20  
21 741 approach to deductive analysis using implementation theory. LSC and AM were involved in  
22  
23 742 thematic analysis. LSC, NAL and AM were involved in deductive analysis. LSC and NAL  
24  
25 743 drafted the manuscript; all authors (LMC, DAO, YMY, CN) critically reviewed the  
26  
27 744 manuscript and provided feedback.  
28  
29  
30

31 745

32  
33 746 **Data availability statement:** De-identified therapist data are available from the  
34  
35 747 corresponding author. Additional data (therapists quotes) are included in the supplementary  
36  
37 748 material (Appendix 2 and 3 codebooks).  
38  
39

40 749

41  
42 750

43 751  
44  
45  
46  
47  
48  
49  
50  
51  
52  
53  
54  
55  
56  
57  
58  
59  
60



## 752 REFERENCES

- 753
- 754 1. Martinez-Arizala A. Methods to measure sensory function in humans versus animals. *J Rehabil Res Dev.* 2003;40(4).
- 755
- 756 2. Carey LM, Matyas TA. Frequency of discriminative sensory loss in the hand after stroke in a rehabilitation setting. *J Rehabil Med.* 2011;43(3):257-263.
- 757
- 758 3. Connell LA, Lincoln NB, Radford KA. Somatosensory impairment after stroke: Frequency of different deficits and their recovery. *Clin Rehabil.* 2008;22(8):758-767.
- 759
- 760 4. Kessner SS, Schlemm E, Cheng B, et al. Somatosensory deficits after ischemic stroke. *Stroke.* 2019;50(5):1116-1123.
- 761
- 762 5. Kim JS, Choi-Kwon S. Discriminative sensory dysfunction after unilateral stroke. *Stroke* 1996;27(4):677-682.
- 763
- 764 6. Kalra L. Stroke rehabilitation 2009: Old chestnuts and new insights. *Stroke* 2010;41(2):e88-e90.
- 765
- 766 7. Sullivan JE, Hedman LD. Sensory dysfunction following stroke: incidence, significance, examination, and intervention. *Top Stroke Rehabil.* 2008;15(3):200-217.
- 767
- 768 8. Pumpa LU, Cahill LS, Carey LM. Somatosensory assessment and treatment after stroke: An evidence-practice gap. *Aust Occup Ther J.* 2015;62(2):93-104.
- 769
- 770 9. Stroke Foundation. National Stroke Audit: Rehabilitation Services Report 2018 Stroke Foundation Published 2018. Accessed.
- 771
- 772 10. Winward CE, Halligan PW, Wade DT. Current practice and clinical relevance of somatosensory assessment after stroke. *Clin Rehabil.* 1999;13(1):48-55.
- 773
- 774 11. Turville ML, Cahill LS, Matyas TA, Blennerhassett JM, Carey LM. The effectiveness of somatosensory retraining for improving sensory function in the arm following stroke: a systematic review. *Clin Rehabil.* 2019;33(5):834-846.
- 775
- 776 12. Carlsson H, Gard G, BrogÅRdh C. Upper-limb sensory impairments after stroke: Self-reported experiences of daily life and rehabilitation *Journal of Rehabilitation Medicine* 2018;50(1):45-51.
- 777
- 778 13. Connell LA, McMahan NE, Adams N. Stroke survivors' experiences of somatosensory impairment after stroke: An Interpretative Phenomenological Analysis. *Physiotherapy.* 2014;100(2):150-155.
- 779
- 780 14. Doyle SD, Bennett S, Dudgeon B. Upper limb post-stroke sensory impairments: The survivor's experience. *Disabil Rehabil.* 2014;36(12):993-1000.
- 781
- 782 15. Doyle S, Bennett S, Fasoli S, E., & McKenna, K. T. . Interventions for sensory impairment in the upper limb after stroke. *Cochrane Database Syst Rev.* 2010;6.
- 783
- 784 16. Carey L, Macdonell R, Matyas TA. SENSE: Study of the Effectiveness of Neurorehabilitation on Sensation: a randomized controlled trial. *Neurorehabil Neural Repair.* 2011;25(4):304-313.
- 785
- 786 17. Intercollegiate Stroke Working Party. Stroke guidelines 5th ed. 2016. Retrieved from <https://www.replondon.ac.uk/guidelines-policy/stroke-guidelines>.
- 787
- 788 18. Stroke Foundation. Clinical guidelines for stroke management 2020 (Living guidelines). Stroke Foundation Published 2020. Available from: <https://strokefoundation.org.au/What-we-do/Treatment-programs/Clinical-guidelines>.
- 789
- 790 19. Winstein CJ, Stein J, Arena R, et al. Guidelines for adult stroke rehabilitation and recovery: a guideline for healthcare professionals from the American Heart Association/American Stroke Association. *Stroke.* 2016;47(6):e98-e169.
- 791
- 792 20. Doyle SD, Bennett S, Dudgeon BJ. Sensory impairment after stroke: Exploring therapists' clinical decision making. *Canadian Journal of Occupational Therapy.* 2014;81(4):215-225.
- 793
- 794
- 795
- 796
- 797
- 798
- 799
- 800



- 1  
2  
3 801 21. Bayley MT, Hurdowar A, Richards CL, et al. Barriers to implementation of stroke  
4 802 rehabilitation evidence: findings from a multi-site pilot project. *Disabil Rehabil.*  
5 803 2012;34(19):1633-1638.
- 6 804 22. Doyle S, Bennett S, Gustafsson L. Clinical decision making when addressing upper  
7 805 limb post-stroke sensory impairments. *Br J Occup Ther.* 2013;76(6):254-263.
- 8 806 23. Doyle SD, Bennett S. Feasibility and Effect of a Professional Education Workshop for  
9 807 Occupational Therapists' Management of Upper-Limb Poststroke Sensory  
10 808 Impairment. *Am J Occup Ther.* 2014;68(3):e74-e83.
- 11 809 24. Bauer MS, Damschroder L, Hagedorn H, Smith J, & Kilbourne AM. An introduction  
12 810 to implementation science for the non-specialist. *BMC Psychology* 2015;3(1):32.
- 13 811 25. Nilsen P. Making sense of implementation theories, models and frameworks.  
14 812 *Implementation Science.* 2015;10(1):53.
- 15 813 26. Eccles MaCETBRG. Designing theoretically-informed implementation interventions.  
16 814 *Implementation Science.* 2006;1(1):4.
- 17 815 27. Kislov R, Pope C, Martin GP, Wilson PM. Harnessing the power of theorising in  
18 816 implementation science. *Implementation Science.* 2019;14(1):103.
- 19 817 28. Cane J, O'Connor D, & Michie S. Validation of the theoretical domains framework  
20 818 for use in behaviour change and implementation research. *Implementation Science.*  
21 819 2012;7(1):37.
- 22 820 29. May C, Finch T. Implementing, embedding, and integrating practices: An outline of  
23 821 normalization process theory. *Sociology.* 2009;43(3):535-554.
- 24 822 30. McEvoy R, Ballini L, Maltoni S, O'Donnell CA, Mair FS, MacFarlane A. A  
25 823 qualitative systematic review of studies using the normalization process theory to  
26 824 research implementation processes. *Implementation Science* 2014;9(2).
- 27 825 31. Atkins L, Francis J, Islam R, et al. A guide to using the Theoretical Domains  
28 826 Framework of behaviour change to investigate implementation problems. *Implement*  
29 827 *Sci.* 2017;12(1):77.
- 30 828 32. Cahill L, Lannin N, Mak-Yuen Y, Turville M, Carey L. Changing practice in the  
31 829 assessment and treatment of somatosensory loss in stroke survivors: Protocol for a  
32 830 knowledge translation study. *BMC Health Serv Res.* 2018;18(1):34.
- 33 831 33. Hamilton AB, Finley EP. Qualitative methods in implementation research: An  
34 832 introduction. *Psychiatry Res.* 2019;280:112516.
- 35 833 34. Braun V, Clarke V. Using thematic analysis in psychology. *Qualitative Research in*  
36 834 *Psychology.* 2006;3(2):77-101.
- 37 835 35. Terry G, Hayfield N, Clarke V, Braun V. Thematic analysis. *The Sage handbook of*  
38 836 *qualitative research in psychology.* 2017:17-37.
- 39 837 36. MacFarlane A, O'Reilly-de Brún M. Using a theory-driven conceptual framework in  
40 838 qualitative health research. *Qual Health Res.* 2012;22(5):607-618.
- 41 839 37. May C, Finch T, Rapley T. Normalisation Process Theory. In: Nilsen SBP, ed.  
42 840 *International Handbook of Implementation Science.* London: Edward Elgar 2020.
- 43 841 38. McNaughton RJ, Steven A, Shucksmith J. Using Normalization Process Theory as a  
44 842 Practical Tool Across the Life Course of a Qualitative Research Project. *Qual Health*  
45 843 *Res.* 2020;30(2):217-227.
- 46 844 39. Sandström B, Willman A, Svensson B, Borglin G. Perceptions of national guidelines  
47 845 and their (non) implementation in mental healthcare: a deductive and inductive  
48 846 content analysis. *Implementation Science.* 2015;10(1):43.
- 49 847 40. Doyle S, Bennett S, Gustafsson L. Occupational therapy for upper limb post-stroke  
50 848 sensory impairments: a survey. *Br J Occup Ther.* 2013;76(10):434-442.

1  
2  
3  
4  
5  
6  
7  
8  
9  
10  
11  
12  
13  
14  
15  
16  
17  
18  
19  
20  
21  
22  
23  
24  
25  
26  
27  
28  
29  
30  
31  
32  
33  
34  
35  
36  
37  
38  
39  
40  
41  
42  
43  
44  
45  
46  
47  
48  
49  
50  
51  
52  
53  
54  
55  
56  
57  
58  
59  
60

- 849 41. McCluskey A, Vratsistas-Curto A, Schurr K. Barriers and enablers to implementing  
850 multiple stroke guideline recommendations: a qualitative study. *BMC Health Serv*  
851 *Res.* 2013;13:323.
- 852 42. Meyer S, Karttunen AH, Thijs V, Feys H, Verheyden G. How Do Somatosensory  
853 Deficits in the Arm and Hand Relate to Upper Limb Impairment, Activity, and  
854 Participation Problems After Stroke? A Systematic Review. *Phys Ther.*  
855 2014;94(9):1220-1231.
- 856 43. Carey LM, Lamp G, Turville M. The state-of-the-science on somatosensory function  
857 and its impact on daily life in adults and older adults, and following stroke: a scoping  
858 review. *OTJR: Occupation, Participation and Health.* 2016;36:27S-41S.
- 859 44. Michie S, Atkins L, West R. The behaviour change wheel: a guide to designing  
860 interventions. 2014. *Great Britain: Silverback Publishing.* 2015.
- 861 45. Jolliffe L, Hoffmann T, Lannin NA. Increasing the uptake of stroke upper limb  
862 guideline recommendations with occupational therapists and physiotherapists. A  
863 qualitative study using the Theoretical Domains Framework. *Aust Occup Ther J.*  
864 2019;66(5):603-616.
- 865 46. Nelson ML, Hanna E, Hall S, Calvert M. What makes stroke rehabilitation patients  
866 complex? Clinician perspectives and the role of discharge pressure. *Journal of*  
867 *Comorbidity.* 2016;6(2):35-41.
- 868 47. Currie K, King C, McAloney-Kocaman K, et al. Barriers and enablers to meticillin-  
869 resistant *Staphylococcus aureus* admission screening in hospitals: A mixed-methods  
870 study. *J Hosp Infect.* 2019;101(1):100-108.
- 871 48. Al Shemeili S, Klein S, Strath A, Fares S, Stewart D. An exploration of health  
872 professionals' experiences of medicines management in elderly, hospitalised patients  
873 in Abu Dhabi. *Int J Clin Pharm.* 2016;38(1):107-118.
- 874 49. Birken SA, Powell BJ, Presseau J, Kirk MA, Lorencatto F, Gould NJ & Haines E.  
875 Combined use of the Consolidated Framework for Implementation Research (CFIR)  
876 and the Theoretical Domains Framework (TDF): A systematic review.  
877 *Implementation Science.* 2017;12(1):2.  
878

## Appendix 1.

### *Focus group and interview questions*

#### Questions used in focus groups and interviews

- 1. How able do you feel currently to change your practice regarding sensory assessment and treatment?*
- 2. What do you think some of the challenges will be in using new assessment and treatment approaches?*
- 3. What do you see as some of the strengths of this organisation in supporting your use of new sensory assessments and treatments?*
- 4. How do you feel about the prospect of changing the way you assess and treat sensory loss?*
- 5. Do you think the working environment (i.e. either cultural / physical) will impact on your ability to use new assessment and treatment approaches?*
- 6. What are the incentives for you currently, if any, to change your practice in the areas of sensory rehabilitation?*
- 7. Do you think a change in practice in the area of sensory assessment and treatment will have a positive effect on patient outcomes?*

## Appendix 2.

Study: Factors influencing allied health professionals' implementation of upper limb sensory rehabilitation for stroke survivors: A qualitative study to inform knowledge translation

### Theoretical Domains Framework (TDF) Codebook

Note:

Sensory rehabilitation refers to both assessment and treatment of sensation, in this case using SENSE Assess and SENSE therapy

| TDF Domain                                                                                                                                                                                                                   | Construct                                                                                                                                                                                                                                                                                                                           | Guidance/rule                                                                                                                                                                                                                                                                                                                                                                                                                                                                                                                                                                                                                                                                                                      | Sample quotes                                                                                                                                                                                                                                                                                                                                                                                                                                                                                                                                                                                      |
|------------------------------------------------------------------------------------------------------------------------------------------------------------------------------------------------------------------------------|-------------------------------------------------------------------------------------------------------------------------------------------------------------------------------------------------------------------------------------------------------------------------------------------------------------------------------------|--------------------------------------------------------------------------------------------------------------------------------------------------------------------------------------------------------------------------------------------------------------------------------------------------------------------------------------------------------------------------------------------------------------------------------------------------------------------------------------------------------------------------------------------------------------------------------------------------------------------------------------------------------------------------------------------------------------------|----------------------------------------------------------------------------------------------------------------------------------------------------------------------------------------------------------------------------------------------------------------------------------------------------------------------------------------------------------------------------------------------------------------------------------------------------------------------------------------------------------------------------------------------------------------------------------------------------|
| <b>1. Knowledge</b><br><br>An awareness of the existence of something<br><br><i>What do they know and how does that influence what they do?*</i><br><br><i>Whether the therapist has knowledge of sensory rehabilitation</i> | <u>Knowledge</u> (including knowledge of condition/scientific rationale): <i>An awareness of the existence of something</i><br><br><u>Procedural knowledge</u> : <i>Knowing how to do something</i><br><br><u>Knowledge of task environment</u> : <i>Knowledge of the social and material context in which a task is undertaken</i> | Appropriate coding to this domain:<br><br>Knowledge/Lack of knowledge of: <ul style="list-style-type: none"> <li>▪ Nature of post-stroke sensory loss</li> <li>▪ Scientific rationale for sensory rehabilitation</li> <li>▪ Clinical practice guidelines</li> <li>▪ Sensory assessment and treatment approaches</li> <li>▪ Procedure of sensory rehabilitation</li> <li>▪ Equipment and materials needed</li> <li>▪ Anecdotal evidence related to sensory rehabilitation</li> </ul><br>Inappropriate coding to this domain: <ul style="list-style-type: none"> <li>▪ The active 'doing' of rehabilitation (code to Skills)</li> <li>▪ Discussion of who provides sensory rehabilitation (code to Social</li> </ul> | <i>"you educate the patients on you know, safety awareness between hot cold and sharp objects and what not, but in terms of rehabilitation...I'm just not aware of what to do" (Site 4_P6)</i><br><br><i>"I barely remember even covering sensation at uni" (Site 7_P3)</i><br><br><i>"...they [sensory assessments] were all listed and I'm thinking I don't know them...from years of experience, I didn't know any of them.....that was disconcerting" (Site 1_P10) [Construct: Knowledge]</i><br><br><i>"I just do things but I don't know what principles they fall under and things like</i> |

|                                                                         |                                                                                                                                                                                                                                                                                                                                                                                                                                                                                                                                                                                                                                                                                                                                                                                                                                                                                                                                                                                                                                             |                                                                                                                                                                                                                                                                                                                                                                                                                                                                                                                                                                                                     |                                                                                                                                                                                                                                                                                                                                                                                                                                                                                                                                                                                                                                                                                                                                                                                                                                                 |
|-------------------------------------------------------------------------|---------------------------------------------------------------------------------------------------------------------------------------------------------------------------------------------------------------------------------------------------------------------------------------------------------------------------------------------------------------------------------------------------------------------------------------------------------------------------------------------------------------------------------------------------------------------------------------------------------------------------------------------------------------------------------------------------------------------------------------------------------------------------------------------------------------------------------------------------------------------------------------------------------------------------------------------------------------------------------------------------------------------------------------------|-----------------------------------------------------------------------------------------------------------------------------------------------------------------------------------------------------------------------------------------------------------------------------------------------------------------------------------------------------------------------------------------------------------------------------------------------------------------------------------------------------------------------------------------------------------------------------------------------------|-------------------------------------------------------------------------------------------------------------------------------------------------------------------------------------------------------------------------------------------------------------------------------------------------------------------------------------------------------------------------------------------------------------------------------------------------------------------------------------------------------------------------------------------------------------------------------------------------------------------------------------------------------------------------------------------------------------------------------------------------------------------------------------------------------------------------------------------------|
|                                                                         |                                                                                                                                                                                                                                                                                                                                                                                                                                                                                                                                                                                                                                                                                                                                                                                                                                                                                                                                                                                                                                             | Professional Role and Identity) <ul style="list-style-type: none"> <li>Therapist report of patient knowledge regarding sensation</li> </ul>                                                                                                                                                                                                                                                                                                                                                                                                                                                         | <i>that, so... I was a bit overwhelmed' (Site 4_P5) [Construct: Procedural Knowledge]</i>                                                                                                                                                                                                                                                                                                                                                                                                                                                                                                                                                                                                                                                                                                                                                       |
| <b>2. Skills</b><br>An ability or proficiency acquired through practice | <p><u>Skills development:</u> <i>The gradual acquisition or advancement through progressive stages of an ability or proficiency acquired through training and practice</i></p> <p><u>Competence:</u> <i>One's repertoire of skills, and ability especially as it is applied to a task or set of tasks</i></p> <p><u>Ability:</u> <i>Competence or capacity to perform a physical or mental act. Ability may be either unlearned or acquired by education and practice</i></p> <p><u>Interpersonal skills:</u> <i>An aptitude enabling a person to carry on effective relationships with others, such as an ability to cooperate, to assume appropriate social responsibilities or to exhibit adequate flexibility</i></p> <p><u>Practice:</u> <i>Repetition of an act, behaviour, or series of activities, often to improve performance or acquire a skill</i></p> <p><u>Skills assessment:</u> <i>A judgment of the quality, worth, importance. Level or value of an ability or proficiency acquired through training and practice</i></p> | Appropriate coding to this domain: <ul style="list-style-type: none"> <li>Development of sensory rehabilitation skills</li> <li>Competence and ability in sensory rehabilitation</li> <li>Practice of sensory rehabilitation skills</li> <li>Evaluation of quality of sensory rehabilitation practices</li> <li>Discussion of how relationship/rapport between therapist and patient may promote use of sensory rehabilitation</li> </ul><br>Inappropriate coding to this domain: <ul style="list-style-type: none"> <li>How therapists feel about current skill level (Code to Emotion)</li> </ul> | <p><i>"So it's not just necessarily about the knowing it's I think sometimes more about the doing....that's sometimes the hard part." (Site 8_P1)</i></p> <p><i>"I also had a young patient recently who...his only issue was sensation, decreased sensation in his hand and I really didn't feel like I had the skills to know where to go in my specific intervention" (Site 8_P3)</i></p> <p><i>"I'm not very skilled in that area [sensory rehabilitation] either. So I probably avoid it." (Site 4_P1)</i></p> <p><i>"I think it's that carry over, you kind of get that feeling that you need to be doing it really regularly to be able to keep those skills up-to-date" (Site 3_P4) [Construct: Practice]</i></p> <p><i>"I'm probably a bit slap-dash in my approach to sensory assessments (Site 6_P6) [Construct: Competence]</i></p> |

|                                                                                                                                                                                                                                                                                                           |                                                                                                                                                                                                                                                                                                                                                                                                                                                                                                                                                                                                                                                                                                                                                                                                                                                                                                                                                                                                                                                                                                                                                                                                                                                  |                                                                                                                                                                                                                                                                                                                                                                                                                                                                          |                                                                                                                                                                                                                                                                                                                                                                                                                                                                                                                     |
|-----------------------------------------------------------------------------------------------------------------------------------------------------------------------------------------------------------------------------------------------------------------------------------------------------------|--------------------------------------------------------------------------------------------------------------------------------------------------------------------------------------------------------------------------------------------------------------------------------------------------------------------------------------------------------------------------------------------------------------------------------------------------------------------------------------------------------------------------------------------------------------------------------------------------------------------------------------------------------------------------------------------------------------------------------------------------------------------------------------------------------------------------------------------------------------------------------------------------------------------------------------------------------------------------------------------------------------------------------------------------------------------------------------------------------------------------------------------------------------------------------------------------------------------------------------------------|--------------------------------------------------------------------------------------------------------------------------------------------------------------------------------------------------------------------------------------------------------------------------------------------------------------------------------------------------------------------------------------------------------------------------------------------------------------------------|---------------------------------------------------------------------------------------------------------------------------------------------------------------------------------------------------------------------------------------------------------------------------------------------------------------------------------------------------------------------------------------------------------------------------------------------------------------------------------------------------------------------|
| <p>3. <b>Social/professional role and identity</b></p> <p>A coherent set of behaviours and displayed personal qualities of an individual in a social or work setting</p> <p><i>How does who they are as an occupational therapist or physiotherapist influence whether they do something or not?*</i></p> | <p><u>Professional identity:</u> <i>The characteristics by which an individual is recognised relating to, connected with or befitting a particular profession</i></p> <p><u>Professional role:</u> <i>The behaviour considered appropriate for a particular kind of work or social position</i></p> <p><u>Social identity:</u> <i>The set of behavioural or personal characteristics by which an individual is recognizable [and portrays] as a member of a social group</i></p> <p><u>Identity:</u> <i>An individual's sense of self defined by a) a set of physical and psychological characteristics that is not wholly shared with any other person and b) a range of social and interpersonal affiliations (e.g., ethnicity) and social roles.</i></p> <p><u>Professional boundaries:</u> <i>The bounds or limits relating to, or connected with a particular profession or calling</i></p> <p><u>Professional confidence:</u> <i>an individual's belief in his or her repertoire of skills and ability especially as it is applied to a task or set of tasks.</i></p> <p><u>Group identity:</u> <i>the set of behavioural or personal characteristics by which an individual is recognizable [and portrays] as a member of a group</i></p> | <p>Appropriate coding to this domain:</p> <ul style="list-style-type: none"> <li>▪ Who provides sensory rehabilitation</li> <li>▪ Link between profession and tasks of sensory rehabilitation</li> <li>▪ Boundaries between therapists in providing sensory rehabilitation</li> <li>▪ Organisational commitment</li> </ul> <p>Identity could also relate to the identity of the organisation (i.e. a health service having a reputation of 'world-class healthcare')</p> | <p><i>"if there's an OT involved we would deflect that as an OT thing as opposed to what we would do"</i> (Site 1_P4) [Construct: Professional boundaries]</p> <p><i>"And I'll be the first to admit if I've got an OT working with my client at the same time then I won't prioritise upper limb sensory"</i> (Site 6_P6)</p> <p><i>"in terms of the other disciplines, they look to us (OT) as an expert in this area, and there's a very uncomfortable feeling"</i> (Site 8_P7) [Construct: Social Identity]</p> |
|-----------------------------------------------------------------------------------------------------------------------------------------------------------------------------------------------------------------------------------------------------------------------------------------------------------|--------------------------------------------------------------------------------------------------------------------------------------------------------------------------------------------------------------------------------------------------------------------------------------------------------------------------------------------------------------------------------------------------------------------------------------------------------------------------------------------------------------------------------------------------------------------------------------------------------------------------------------------------------------------------------------------------------------------------------------------------------------------------------------------------------------------------------------------------------------------------------------------------------------------------------------------------------------------------------------------------------------------------------------------------------------------------------------------------------------------------------------------------------------------------------------------------------------------------------------------------|--------------------------------------------------------------------------------------------------------------------------------------------------------------------------------------------------------------------------------------------------------------------------------------------------------------------------------------------------------------------------------------------------------------------------------------------------------------------------|---------------------------------------------------------------------------------------------------------------------------------------------------------------------------------------------------------------------------------------------------------------------------------------------------------------------------------------------------------------------------------------------------------------------------------------------------------------------------------------------------------------------|



|                                                                                                                                                                                                                                                                                                                                                                       |                                                                                                                                                                                                                                                                                                                                                                                                                                                                                                                                                                                                                                                                                                                                                                                                                                                                              |                                                                                                                                                                                                                                                                                                                                                                                                                                                                                                                                                                                                                                                                      |                                                                                                                                                                                                                                                                                                                                                                                                                                                                                                                                                                                                                                                                                                                                                                                    |
|-----------------------------------------------------------------------------------------------------------------------------------------------------------------------------------------------------------------------------------------------------------------------------------------------------------------------------------------------------------------------|------------------------------------------------------------------------------------------------------------------------------------------------------------------------------------------------------------------------------------------------------------------------------------------------------------------------------------------------------------------------------------------------------------------------------------------------------------------------------------------------------------------------------------------------------------------------------------------------------------------------------------------------------------------------------------------------------------------------------------------------------------------------------------------------------------------------------------------------------------------------------|----------------------------------------------------------------------------------------------------------------------------------------------------------------------------------------------------------------------------------------------------------------------------------------------------------------------------------------------------------------------------------------------------------------------------------------------------------------------------------------------------------------------------------------------------------------------------------------------------------------------------------------------------------------------|------------------------------------------------------------------------------------------------------------------------------------------------------------------------------------------------------------------------------------------------------------------------------------------------------------------------------------------------------------------------------------------------------------------------------------------------------------------------------------------------------------------------------------------------------------------------------------------------------------------------------------------------------------------------------------------------------------------------------------------------------------------------------------|
|                                                                                                                                                                                                                                                                                                                                                                       | <p><u>Leadership</u>: <i>The processes involved in leading others, including organising, directing, coordinating and motivating their efforts toward achievement of certain group or organization goals</i></p> <p><u>Organizational commitment</u>: <i>An employee's dedication to an organisation and wish to remain part of it.</i></p>                                                                                                                                                                                                                                                                                                                                                                                                                                                                                                                                   |                                                                                                                                                                                                                                                                                                                                                                                                                                                                                                                                                                                                                                                                      |                                                                                                                                                                                                                                                                                                                                                                                                                                                                                                                                                                                                                                                                                                                                                                                    |
| <p><b>4. Beliefs about capabilities</b></p> <p>Acceptance of the truth, reality or validity about an ability, talent or facility that a person can put to constructive use</p> <p><i>Do they think they can do what they should do and how does that influence whether they do it or not?*</i></p> <p><i>The extent to which the therapist feels confident/in</i></p> | <p><u>Self-confidence</u>: <i>Self-assurance or trust in one's own abilities, capabilities and judgement</i></p> <p><u>Perceived competence</u>: <i>An individual's belief in their ability to learn and execute skills</i></p> <p><u>Self-efficacy</u>: <i>An individual's capacity to act effectively to bring about desired results, as perceived by the individual</i></p> <p><u>Perceived behavioural control</u>: <i>an individual's perception of the ease or difficulty of performing the behaviour of interest</i></p> <p><u>Beliefs</u>: <i>The thing believed; the proposition/set of propositions held true</i></p> <p><u>Self-esteem</u>: <i>The degree to which the qualities and characteristics contained in one's self-concept are perceived to be positive</i></p> <p><u>Empowerment</u>: <i>The promotion of the skills, knowledge and confidence</i></p> | <p>Appropriate coding to this domain:</p> <ul style="list-style-type: none"> <li>▪ Perceived behavioural control in delivery of sensory rehabilitation</li> <li>▪ Therapist confidence in delivering sensory rehabilitation</li> <li>▪ How easy or difficult therapists view delivery of sensory rehabilitation</li> <li>▪ Self-efficacy and beliefs regarding sensory rehabilitation</li> </ul> <p>Inappropriate coding to this domain:</p> <ul style="list-style-type: none"> <li>▪ Active delivery of sensory rehabilitation (code to Skills)</li> <li>▪ Expectations of outcomes of using sensory rehabilitation (code to Beliefs about consequences)</li> </ul> | <p><i>“there's a bit of trepidation around...needing to achieve a certain standard and being able to use a new tool and being able to... do it correctly” (Site 4_P3)</i></p> <p><i>“And just your general confidence in yourself and...you're in the middle of a session and you're thinking I feel confident and competent in this skill...it's less stressful to approach that client with that issue” (Site 3_P4)</i></p> <p><i>“I'm coming into this thinking, you know this is really good, and it's obviously evidence based practice but can I provide this? Like there's this guilt that, you know, this is best care, this is what I should be doing with my patients but I don't have capacity for that” (Site 7_P4) [Construct: perceived behavioural control]</i></p> |

|                                                                                                                          |                                                                                                                                                                                                                                                                                                                                                                                                                                       |                                                                                                                                                                                                                                                                                                                                                                                                                                                                                                                          |                                                                                                                                                                                                                                                                                                                                                                                                                                                                                                                                                                                                                                                        |
|--------------------------------------------------------------------------------------------------------------------------|---------------------------------------------------------------------------------------------------------------------------------------------------------------------------------------------------------------------------------------------------------------------------------------------------------------------------------------------------------------------------------------------------------------------------------------|--------------------------------------------------------------------------------------------------------------------------------------------------------------------------------------------------------------------------------------------------------------------------------------------------------------------------------------------------------------------------------------------------------------------------------------------------------------------------------------------------------------------------|--------------------------------------------------------------------------------------------------------------------------------------------------------------------------------------------------------------------------------------------------------------------------------------------------------------------------------------------------------------------------------------------------------------------------------------------------------------------------------------------------------------------------------------------------------------------------------------------------------------------------------------------------------|
| <p>control over performing the behavior</p>                                                                              | <p>necessary to take great control of one's life as in certain educational or social schemes; the delegation of increase decision-making powers to individuals or groups in a society or organization</p> <p><u>Professional confidence</u>: An individual's beliefs in his or her repertoire of skills, and ability, especially as it is applied to a task or set of tasks.</p>                                                      |                                                                                                                                                                                                                                                                                                                                                                                                                                                                                                                          |                                                                                                                                                                                                                                                                                                                                                                                                                                                                                                                                                                                                                                                        |
| <p><b>5. Optimism</b><br/>The confidence that things will happen for the best or that desired goals will be attained</p> | <p><u>Optimism</u>: The attitude that outcomes will be positive and that people's wishes or aims will be ultimately fulfilled</p> <p><u>Pessimism</u>: The attitude that things will go wrong and that people's wishes or aims are unlikely to be fulfilled</p> <p><u>Unrealistic optimism</u>: the inert tendency for humans to over-rate their own abilities and chances of positive outcomes compared to those of other people</p> | <p>Appropriate coding to this domain:</p> <ul style="list-style-type: none"> <li>▪ Therapist discussion of optimism or pessimism related to use of sensory rehabilitation</li> <li>▪ Positive or negative view towards process of change in study</li> </ul> <p>Inappropriate coding to this domain:</p> <ul style="list-style-type: none"> <li>▪ Feeling of anxiety, stress or burnout (code to Emotion)</li> <li>▪ Thoughts towards outcomes of sensory rehabilitation (code to Beliefs about consequences)</li> </ul> | <p><i>"I feel a mix of excitement and scepticism, to be honest" (Site 3_P1)</i></p> <p><i>"think it's helpful having that structure as well of the study...like there's some ownership you have to take, the responsibility you have to take to actually use the assessments to use the treatment to guide us to how to feedback about that, so, I think that is really good too." (Site 7_P10)</i></p> <p><i>"the tests we're using to do the initial assessments aren't great, so to re-test ...I can't re-test again, I can't show you were 4 and now you're 5. So I can't prove it to them that what they're doing is working" (Site 8_P3)</i></p> |
|                                                                                                                          |                                                                                                                                                                                                                                                                                                                                                                                                                                       | <p>Appropriate coding to this domain:</p>                                                                                                                                                                                                                                                                                                                                                                                                                                                                                |                                                                                                                                                                                                                                                                                                                                                                                                                                                                                                                                                                                                                                                        |



|                                                                                                                                                                                                                                                                                                                     |                                                                                                                                                                                                                                                                                                                                                                                                                                                                                                                                                                                                                                                                                                                                                                                                                                                                                                                                                                                                                                                                                                                                                |                                                                                                                                                                                                                                                                                                                                                                                                                                                                                                                                                                            |                                                                                                                                                                                                                                                                                                                                                                                                                                                                                                                                                                                                               |
|---------------------------------------------------------------------------------------------------------------------------------------------------------------------------------------------------------------------------------------------------------------------------------------------------------------------|------------------------------------------------------------------------------------------------------------------------------------------------------------------------------------------------------------------------------------------------------------------------------------------------------------------------------------------------------------------------------------------------------------------------------------------------------------------------------------------------------------------------------------------------------------------------------------------------------------------------------------------------------------------------------------------------------------------------------------------------------------------------------------------------------------------------------------------------------------------------------------------------------------------------------------------------------------------------------------------------------------------------------------------------------------------------------------------------------------------------------------------------|----------------------------------------------------------------------------------------------------------------------------------------------------------------------------------------------------------------------------------------------------------------------------------------------------------------------------------------------------------------------------------------------------------------------------------------------------------------------------------------------------------------------------------------------------------------------------|---------------------------------------------------------------------------------------------------------------------------------------------------------------------------------------------------------------------------------------------------------------------------------------------------------------------------------------------------------------------------------------------------------------------------------------------------------------------------------------------------------------------------------------------------------------------------------------------------------------|
| <p><b>6. Beliefs about consequences</b><br/>Acceptance of the truth, reality or validity about outcomes of a behaviour in a given situation</p> <p><i>The extent to which the therapist is in favour of performing sensory rehabilitation and has positive behavioural beliefs about sensory rehabilitation</i></p> | <p><u>Beliefs</u>: <i>The thing believed; the proposition or set of propositions held true</i></p> <p><u>Outcome expectancies</u>: <i>Cognitive, emotional, behavioural, and affective outcomes that are assumed to be associated with future or intended behaviour. These assumed outcomes can either promote or inhibit future behaviours.</i></p> <p><u>Characteristics of outcome expectancies</u>: <i>Characteristics of the cognitive, emotional and behavioural outcomes that individuals believe are associated with future or intended behaviours and that are believed to either promote or inhibit these behaviours. These include whether they are sanctions/rewards, proximal/distal, valued/not valued, probable/improbable. Salient/not salient, perceived risks or threats.</i></p> <p><u>Anticipated regret</u>: <i>A sense of the potential negative consequences of a decision that influences the choice made: for example an individual may decide not to make an investment because of the feelings associated with an imagined loss</i></p> <p><u>Consequents</u>: <i>An outcome behaviour in a given situation</i></p> | <ul style="list-style-type: none"> <li>▪ Positive or negative expectancies of use of sensory rehabilitation</li> <li>▪ Beliefs regarding treatment outcomes</li> <li>▪ Potential long-term outcomes for patients</li> <li>▪ Anticipated regret in not using sensory rehabilitation</li> </ul> <p>Inappropriate coding to this domain:</p> <ul style="list-style-type: none"> <li>▪ Beliefs about whether therapists can provide sensory rehabilitation (code to Beliefs about Capabilities)</li> <li>▪ The confidence goals will be achieved (Code to Optimism)</li> </ul> | <p><i>"I don't necessarily think the patient outcomes will improve" (Site 1_P7)</i></p> <p><i>"... so if there was research that showed direct improvements then I would be adopting things." (Site 4_P1)</i></p> <p><i>"you don't actually know yeah, if it's actually making a difference or not, is it your input or is it something else?" (Site 8_P6)</i></p> <p><i>"it's great when you get a change for a client, I love that, so that's the motivator for this, if something's saying that change is possible that's what motivates me" (Site 6_P4) [Characteristics of outcome expectancies]</i></p> |
|---------------------------------------------------------------------------------------------------------------------------------------------------------------------------------------------------------------------------------------------------------------------------------------------------------------------|------------------------------------------------------------------------------------------------------------------------------------------------------------------------------------------------------------------------------------------------------------------------------------------------------------------------------------------------------------------------------------------------------------------------------------------------------------------------------------------------------------------------------------------------------------------------------------------------------------------------------------------------------------------------------------------------------------------------------------------------------------------------------------------------------------------------------------------------------------------------------------------------------------------------------------------------------------------------------------------------------------------------------------------------------------------------------------------------------------------------------------------------|----------------------------------------------------------------------------------------------------------------------------------------------------------------------------------------------------------------------------------------------------------------------------------------------------------------------------------------------------------------------------------------------------------------------------------------------------------------------------------------------------------------------------------------------------------------------------|---------------------------------------------------------------------------------------------------------------------------------------------------------------------------------------------------------------------------------------------------------------------------------------------------------------------------------------------------------------------------------------------------------------------------------------------------------------------------------------------------------------------------------------------------------------------------------------------------------------|

|                                                                                                                                                                              |                                                                                                                                                                                                                                                                                                                                                                                                                                                                                                                                                                                                                                                                                                                                                                                                                                                                                                                                                                                                                                                                                                                                                                                               |                                                                                                                                                                                                                                                                                                                                                                                                                                                                                                                           |                                                                                                                                                                                                                                                                                                                                                                                                                                                                                                                                                                                                                                                                                                                                                                                                                                                                                     |
|------------------------------------------------------------------------------------------------------------------------------------------------------------------------------|-----------------------------------------------------------------------------------------------------------------------------------------------------------------------------------------------------------------------------------------------------------------------------------------------------------------------------------------------------------------------------------------------------------------------------------------------------------------------------------------------------------------------------------------------------------------------------------------------------------------------------------------------------------------------------------------------------------------------------------------------------------------------------------------------------------------------------------------------------------------------------------------------------------------------------------------------------------------------------------------------------------------------------------------------------------------------------------------------------------------------------------------------------------------------------------------------|---------------------------------------------------------------------------------------------------------------------------------------------------------------------------------------------------------------------------------------------------------------------------------------------------------------------------------------------------------------------------------------------------------------------------------------------------------------------------------------------------------------------------|-------------------------------------------------------------------------------------------------------------------------------------------------------------------------------------------------------------------------------------------------------------------------------------------------------------------------------------------------------------------------------------------------------------------------------------------------------------------------------------------------------------------------------------------------------------------------------------------------------------------------------------------------------------------------------------------------------------------------------------------------------------------------------------------------------------------------------------------------------------------------------------|
| <p><b>7. Reinforcement</b><br/>Increasing the probability of a response by arranging a dependent relationship, or contingency, between the response and a given stimulus</p> | <p><u>Rewards</u> (proximal/distal, valued/ not valued, probable/improbable): <i>Return or recompense made to, or received by a person contingent on some performance.</i></p> <p><u>Incentives</u>: <i>An external stimulus, such as condition or object, that enhances or serves as a motive for behaviour</i></p> <p><u>Punishment</u>: <i>The process in which the relationship between as response and some stimulus or circumstance results in the response becoming less probable; a painful, unwanted or undesired event or circumstance imposed as a penalty on a wrongdoer</i></p> <p><u>Consequents</u>: <i>An outcome of behaviour in a given situation</i></p> <p><u>Reinforcement</u>: <i>A process in which the frequency of a response is increased by a dependent relationship or contingency with a stimulus</i></p> <p><u>Contingencies</u>: <i>A conditional probabilistic relation between two events. Contingencies may be arranged via dependencies or they may emerge by accident</i></p> <p><u>Sanctions</u>: <i>A punishment or other coercive measure, usually administered by a recognized authority, that is used to penalise and deter inappropriate or</i></p> | <p>Appropriate coding to this domain:</p> <ul style="list-style-type: none"> <li>▪ Rewards or incentives for using sensory rehabilitation</li> <li>▪ Perceived punishments, consequents, reinforcements, contingencies, sanctions related to sensory rehabilitation</li> </ul> <p>Inappropriate coding to this domain:</p> <ul style="list-style-type: none"> <li>▪ Opportunities to reinforce or consolidate skills in sensory rehabilitation, code to Skills instead (Construct: Practice/Skill development)</li> </ul> | <p><i>And also often a patient is really focused on their mobility so if a physio started working on their upper limb they'd be saying - 'but come on!' (Site 6_P6)</i><br/>[Construct: Punishment]</p> <p><i>"the clinical guidelines are audited and we get feedback and we have to meet the standards" (Site 3_P8)</i></p> <p><i>"For me it's definitely about best practice and knowing that this type of technique is best practice, it's backed up by evidence research and that I'm currently probably not doing it correctly or as much as I should be doing it so yeah, <b>I think that's definitely my motivation</b>" (Site 8_P1)</i></p> <p><i>"I think everyone's very happy to do things if they feel the patient is going to get a better outcome from it, and I think that's one of the biggest drivers for our inpatient team is that outcome" (Site 3_P3)</i></p> |
|------------------------------------------------------------------------------------------------------------------------------------------------------------------------------|-----------------------------------------------------------------------------------------------------------------------------------------------------------------------------------------------------------------------------------------------------------------------------------------------------------------------------------------------------------------------------------------------------------------------------------------------------------------------------------------------------------------------------------------------------------------------------------------------------------------------------------------------------------------------------------------------------------------------------------------------------------------------------------------------------------------------------------------------------------------------------------------------------------------------------------------------------------------------------------------------------------------------------------------------------------------------------------------------------------------------------------------------------------------------------------------------|---------------------------------------------------------------------------------------------------------------------------------------------------------------------------------------------------------------------------------------------------------------------------------------------------------------------------------------------------------------------------------------------------------------------------------------------------------------------------------------------------------------------------|-------------------------------------------------------------------------------------------------------------------------------------------------------------------------------------------------------------------------------------------------------------------------------------------------------------------------------------------------------------------------------------------------------------------------------------------------------------------------------------------------------------------------------------------------------------------------------------------------------------------------------------------------------------------------------------------------------------------------------------------------------------------------------------------------------------------------------------------------------------------------------------|

|                                                                                                                                                                        |                                                                                                                                                                                                                                                                                                                                                                                                                                                                                                                                                                                                          |                                                                                                                                                                                                                                                                                                                                                                                                                                                                                                                                                                                                 |                                                                                                                                                                                                                                                                                                                                                                                                                                                                           |
|------------------------------------------------------------------------------------------------------------------------------------------------------------------------|----------------------------------------------------------------------------------------------------------------------------------------------------------------------------------------------------------------------------------------------------------------------------------------------------------------------------------------------------------------------------------------------------------------------------------------------------------------------------------------------------------------------------------------------------------------------------------------------------------|-------------------------------------------------------------------------------------------------------------------------------------------------------------------------------------------------------------------------------------------------------------------------------------------------------------------------------------------------------------------------------------------------------------------------------------------------------------------------------------------------------------------------------------------------------------------------------------------------|---------------------------------------------------------------------------------------------------------------------------------------------------------------------------------------------------------------------------------------------------------------------------------------------------------------------------------------------------------------------------------------------------------------------------------------------------------------------------|
| <p><b>8. Intentions</b></p> <p>A conscious decision to perform a behaviour or a resolve to act in a certain way</p> <p>Have they made a decision to provide SENSE?</p> | <p><i>unauthorized actions.</i></p> <p><u>Stability of intentions:</u> <i>ability of one's resolve to remain in spite of disturbing influences</i></p> <p><u>Stages of Change model:</u> <i>A model that proposes that behaviour change is accomplished through five specific stages</i></p> <p><u>Transtheoretical model and stages of change:</u> <i>a five-stage theory to explain changes in people's health behaviour. It suggests that change takes time, that different interventions are effective at different stages, and that there are multiple outcomes occurring across the stages</i></p> | <p>Appropriate coding to this domain:</p> <ul style="list-style-type: none"> <li>▪ Discussion of how motivated/unmotivated therapists are to provide sensory rehabilitation</li> <li>▪ Description of inclination to use sensory rehabilitation and in what situation</li> <li>▪ Stability of intentions regarding sensory rehabilitation, stages of change model, transtheoretical model and stages of change</li> </ul> <p>Inappropriate coding to this domain:</p> <ul style="list-style-type: none"> <li>▪ Practical plans to use sensory rehabilitation (code to Goals instead)</li> </ul> | <p><i>"That's right, if you don't look, you don't know, and you don't have to do anything about it (laughter)!" (Site 8_P1)</i></p> <p><i>"in my limited experience and treatment that I've used some of the SENSE practices with, I've had really significant outcomes so I'm keen to apply it more broadly I guess across the board rather than just the ones that are really severe...sensory issues and see what sort of outcomes we might have." (Site 3_P2)</i></p> |
| <p><b>9. Goals</b></p> <p>Mental representations of outcomes or end states that an individual wants to achieve</p> <p>How much do they want to do SENSE?</p>           | <p><u>Goals (distal/proximal):</u> <i>Desired state of affairs of a person or system, these may be closer (proximal) or further away (distal)</i></p> <p><u>Goal priority:</u> <i>Order of importance or urgency of end state toward which one is striving</i></p> <p><u>Goal/target setting:</u> <i>A process that establishes specific time based behavioural targets that are measurable, achievable and realistic</i></p> <p><u>Goals (autonomous/controlled):</u> <i>The end</i></p>                                                                                                                | <p>Appropriate coding to this domain:</p> <ul style="list-style-type: none"> <li>▪ Goal priority, action planning and implementation intention related to sensory rehabilitation</li> <li>▪ Description of whether or not providing sensory rehabilitation is a priority</li> <li>▪ Practical plans to apply sensory rehabilitation or not</li> </ul> <p>Inappropriate coding to this domain:</p> <ul style="list-style-type: none"> <li>▪ Discussion of readiness to change</li> </ul>                                                                                                         | <p><i>"there's so many other things we need to look at like home assess and other functions and mobility, so yeah, it's a bit low on the priority list" (Site 8_P6)</i></p> <p><i>"if you have the proper equipment, we will be more confident to use it and we'll look more professional too" (Site 7_P6)</i></p>                                                                                                                                                        |

|                                                                                                                                                                                                  |                                                                                                                                                                                                                                                                                                                                                                                                                                                                                                                                                                                                                                                                      |                                                                                                                                                                                                                                                                                                                                                                                                                                                                                                                                                                                        |                                                                                                                                                                                                                                                                                                                                                                                                                                           |
|--------------------------------------------------------------------------------------------------------------------------------------------------------------------------------------------------|----------------------------------------------------------------------------------------------------------------------------------------------------------------------------------------------------------------------------------------------------------------------------------------------------------------------------------------------------------------------------------------------------------------------------------------------------------------------------------------------------------------------------------------------------------------------------------------------------------------------------------------------------------------------|----------------------------------------------------------------------------------------------------------------------------------------------------------------------------------------------------------------------------------------------------------------------------------------------------------------------------------------------------------------------------------------------------------------------------------------------------------------------------------------------------------------------------------------------------------------------------------------|-------------------------------------------------------------------------------------------------------------------------------------------------------------------------------------------------------------------------------------------------------------------------------------------------------------------------------------------------------------------------------------------------------------------------------------------|
|                                                                                                                                                                                                  | <p><i>state toward which one is striving: the purpose of an activity or endeavour. It can be identified by observing that a person ceases or changes their behaviour upon attaining this state; proficiency in a task to be achieved within a set period of time.</i></p> <p><u>Action planning</u>: <i>The action or process of forming a plan regarding a thing to be done or a deed</i></p> <p><u>Implementation intention</u>: <i>The plan that one creates in advance of when, where and how one will enact a behaviour</i></p>                                                                                                                                 | <p>behaviour in sensory rehabilitation<br/>(Code to Intentions instead)</p>                                                                                                                                                                                                                                                                                                                                                                                                                                                                                                            |                                                                                                                                                                                                                                                                                                                                                                                                                                           |
| <p><b>10. Memory, attention and decision processes</b></p> <p>The ability to retain information, focus selectively on aspects of the environment and choose between two or more alternatives</p> | <p><u>Memory</u>: <i>The ability to retain information or a representation of a past experience, based on the mental processes of learning or encoding retention across some interval of time, and retrieval or reactivation of the memory; specific information of a specific task</i></p> <p><u>Attention</u>: <i>A state of awareness in which the senses are focused selectively on aspects of the environment and the central nervous system is in a state of readiness to respond to stimuli</i></p> <p><u>Attention control</u>: <i>The extent to which a person can concentrate on relevant cues and ignore all irrelevant cues in a given situation</i></p> | <p>Appropriate coding to this domain:</p> <ul style="list-style-type: none"> <li>▪ Retaining information on how to deliver sensory rehabilitation</li> <li>▪ Deciding between the use of different sensory assessments</li> <li>▪ Cognitive overload/fatigue related to delivering sensory rehabilitation</li> </ul> <p>Inappropriate coding to this domain:</p> <ul style="list-style-type: none"> <li>▪ Discussion of system pressures that impact on decisions to use sensory rehabilitation (Code to Environmental Context and Resources: e.g. Environmental Stressors)</li> </ul> | <p><i>“For me it’s more about the scale of prioritisation.... is it what they should be doing out amongst all of all their other priorities?” (Site 7_P2)</i></p> <p><i>“and that affects your confidence and your quality of treatment because you might...upskill for a patient and you don’t have another patient with sensory loss for ages and you’re kind of like going back to ‘oh, what did I do last time?’” (Site 8_P5)</i></p> |

|                                                                                                                                                                                                                                                                                                                                              |                                                                                                                                                                                                                                                                                                                                                                                                                                                                                                                                                                                                                                                                                                                                                                                                                                           |                                                                                                                                                                                                                                                                                                                                                                                                                                                                                                                                                                                                                                                                                                                                              |                                                                                                                                                                                                                                                                                                                                                                                                                                                                                                                                                                                                                                                                                                                                                          |
|----------------------------------------------------------------------------------------------------------------------------------------------------------------------------------------------------------------------------------------------------------------------------------------------------------------------------------------------|-------------------------------------------------------------------------------------------------------------------------------------------------------------------------------------------------------------------------------------------------------------------------------------------------------------------------------------------------------------------------------------------------------------------------------------------------------------------------------------------------------------------------------------------------------------------------------------------------------------------------------------------------------------------------------------------------------------------------------------------------------------------------------------------------------------------------------------------|----------------------------------------------------------------------------------------------------------------------------------------------------------------------------------------------------------------------------------------------------------------------------------------------------------------------------------------------------------------------------------------------------------------------------------------------------------------------------------------------------------------------------------------------------------------------------------------------------------------------------------------------------------------------------------------------------------------------------------------------|----------------------------------------------------------------------------------------------------------------------------------------------------------------------------------------------------------------------------------------------------------------------------------------------------------------------------------------------------------------------------------------------------------------------------------------------------------------------------------------------------------------------------------------------------------------------------------------------------------------------------------------------------------------------------------------------------------------------------------------------------------|
|                                                                                                                                                                                                                                                                                                                                              | <p><u>Decision making:</u> <i>The cognitive process of choosing between two or more alternatives, ranging from the relatively clear-cut to the complex</i></p> <p><u>Cognitive overload/tiredness:</u> <i>The situation in which the demands placed on a person by mental work are greater than a person's mental abilities</i></p>                                                                                                                                                                                                                                                                                                                                                                                                                                                                                                       |                                                                                                                                                                                                                                                                                                                                                                                                                                                                                                                                                                                                                                                                                                                                              |                                                                                                                                                                                                                                                                                                                                                                                                                                                                                                                                                                                                                                                                                                                                                          |
| <p><b>11. Environmental context and resources</b></p> <p>Any circumstance of a person's situation or environment that discourages or encourages the development of skills and abilities, independence, social competence and adaptive behaviour</p> <p><i>The extent to which the therapist feels the environmental context supports</i></p> | <p><u>Environmental stressors:</u> <i>External factors in the environment that cause stress</i></p> <p><u>Resources/material resources:</u> <i>Commodities and human resources used in enacting a behaviour</i></p> <p><u>Organizational culture/climate:</u> <i>A distinctive pattern of thought and behaviour shared by members of the same organization and reflected in their language, values, attitudes, beliefs and customs</i></p> <p><u>Salient events/critical incidents:</u> <i>Occurrences that one judges to be distinctive, prominent or otherwise significant</i></p> <p><u>Person x environment interaction:</u> <i>Interplay between the individual and their surroundings</i></p> <p><u>Barriers and facilitators:</u> <i>In psychological contexts, barriers/facilitators are mental, emotional or behavioural</i></p> | <p>Appropriate coding to this domain:</p> <ul style="list-style-type: none"> <li>▪ Availability of equipment to deliver sensory rehabilitation</li> <li>▪ Setting in which sensory rehabilitation will be delivered</li> <li>▪ Organisational culture/climate, impacting on delivery of sensory rehabilitation</li> <li>▪ Description of how more time will be required to deliver sensory rehabilitation</li> <li>▪ Patient factors that would influence whether sensory rehabilitation was offered or provided</li> <li>▪ Salient events related to sensory rehabilitation</li> </ul> <p>Inappropriate coding to this domain:</p> <ul style="list-style-type: none"> <li>▪ Patient factors based on interpersonal processes and</li> </ul> | <p><i>"I'm really pleased we're getting the equipment provided because I think that would have been the largest barrier" (Site 8_P1) [Construct: Resources/material resources]</i></p> <p><i>"I feel it's a supportive culture that wants to look at what evidence based information is out there and how do we further our clinicians' knowledge, so I feel... it's a good environment to make change." (Site 6_P1)</i></p> <p><i>"I think bed pressures could always be something that could come up, if there's a pressure to discharge a patient and we haven't been able to follow through with all the sensory interventions" (Site 8_P6)</i></p> <p><i>"I think it's just the health care system, of processes have to happen, we have to</i></p> |

|                                                                                                                                                                                                                    |                                                                                                                                                                                                                                                                                                                                                                                                                                                                                                                       |                                                                                                                                                                                                                                                                                                                                                                                                                                                                                                       |                                                                                                                                                                                                                                                                                                                                                                                                                                                                                                                                                                                  |
|--------------------------------------------------------------------------------------------------------------------------------------------------------------------------------------------------------------------|-----------------------------------------------------------------------------------------------------------------------------------------------------------------------------------------------------------------------------------------------------------------------------------------------------------------------------------------------------------------------------------------------------------------------------------------------------------------------------------------------------------------------|-------------------------------------------------------------------------------------------------------------------------------------------------------------------------------------------------------------------------------------------------------------------------------------------------------------------------------------------------------------------------------------------------------------------------------------------------------------------------------------------------------|----------------------------------------------------------------------------------------------------------------------------------------------------------------------------------------------------------------------------------------------------------------------------------------------------------------------------------------------------------------------------------------------------------------------------------------------------------------------------------------------------------------------------------------------------------------------------------|
| <p>performance of sensory rehabilitation</p>                                                                                                                                                                       | <p>limitations/strengths in individuals or groups</p>                                                                                                                                                                                                                                                                                                                                                                                                                                                                 | <p>views/opinions of patients – this should be coded to social influence</p>                                                                                                                                                                                                                                                                                                                                                                                                                          | <p>deliver a service and we have to meet targets...improving our practices is only part of what we need to deliver...so....it's all a balance" (Site 6_P3) [Environmental stressors]</p> <p>"the other thing is in my limited experience and treatment that I've used some of the SENSE practices with, I've had really significant outcomes so I'm keen to apply it more broadly" [Salient event]</p> <p>"I think it's pretty rare too... that patients come through sort of the inpatient rehab part of the continuum, when sensation is their biggest issue" (Site 3_P12)</p> |
| <p><b>12. Social influences</b><br/>Those <b>interpersonal processes</b> that can cause individuals to change their thoughts, feelings or behaviours</p> <p>What do others think of what they do? Who are they</p> | <p><u>Social pressure</u>: the exertion of influence on a person or group by another person or group</p> <p><u>Social norms</u>: Socially determined consensual standards that indicate a) what behaviours are considered typical in a given context and b) what behaviours are considered proper in the context</p> <p><u>Group conformity</u>: The act of consciously maintaining a certain degree of similarity to those in your general social circles</p> <p><u>Social comparisons</u>: The process by which</p> | <p>Appropriate coding to this domain:</p> <ul style="list-style-type: none"> <li>▪ Views and opinions of others (colleagues, patients, professional groups) influencing decision to provide sensory rehabilitation</li> <li>▪ Impact of others on whether or not sensory rehabilitation is provided</li> <li>▪ Discussing importance of patient engagement/buy-in</li> <li>▪ Social pressure to deliver or not deliver sensory rehabilitation</li> <li>▪ Social support to provide sensory</li> </ul> | <p>"I'm finding that some patients are very savvy and have read up a lot about things and they will actually say 'are you doing this treatment technique?'"(Site 2_P8)</p> <p>"our consultant might start asking us questions in terms of why are we spending so much time on sensation when we should be doing A, B and C in terms of discharge planning" (Site 1_P5)</p> <p>"Our stroke consultant's really into research and new things so she'd be very,</p>                                                                                                                 |



|                                                                                                                                                                                                                                           |                                                                                                                                                                                                                                                                                                                                                                                                                                                                                                                                                                                                                                                                                                                                                                                                                                                                                                                                                                                                                                                                                                                                                                                                                                       |                                                                                                                                                                                                                                                                                                                         |                                                                                                                                                                                                                                                                                                                                                                                                                                                                                                                                         |
|-------------------------------------------------------------------------------------------------------------------------------------------------------------------------------------------------------------------------------------------|---------------------------------------------------------------------------------------------------------------------------------------------------------------------------------------------------------------------------------------------------------------------------------------------------------------------------------------------------------------------------------------------------------------------------------------------------------------------------------------------------------------------------------------------------------------------------------------------------------------------------------------------------------------------------------------------------------------------------------------------------------------------------------------------------------------------------------------------------------------------------------------------------------------------------------------------------------------------------------------------------------------------------------------------------------------------------------------------------------------------------------------------------------------------------------------------------------------------------------------|-------------------------------------------------------------------------------------------------------------------------------------------------------------------------------------------------------------------------------------------------------------------------------------------------------------------------|-----------------------------------------------------------------------------------------------------------------------------------------------------------------------------------------------------------------------------------------------------------------------------------------------------------------------------------------------------------------------------------------------------------------------------------------------------------------------------------------------------------------------------------------|
| <p>and how does that influence what they do?*</p> <p>The extent to which therapists feel social pressure to engage in sensory rehabilitation</p> <p>*Interpersonal processes indicate an interaction that is verbal or non-verbal ***</p> | <p>people evaluate their attitudes, abilities or performance relative to others</p> <p><u>Group norms</u>: Any behaviour, belief, attitude or emotional reaction held to be correct or acceptable by a given group in society</p> <p><u>Social support</u>: The apperception or provision of assistance or comfort to others, typically in order to help them cope with a variety of biological, psychological and social stressors.</p> <p>Support may arise from any interpersonal relationship in an individual's social network, involving friends, neighbours, religious institutions, colleagues, caregivers of support groups</p> <p><u>Power</u>: The capacity to influence others, even when they try to resist this influence</p> <p><u>Intergroup conflict</u>: Disagreement or confrontation between two or more groups and their members. This may involve physical violence, interpersonal discord, or psychological tension.</p> <p><u>Alienation</u>: Estrangement from one's social group; a deep seated sense of dissatisfaction with one's personal experiences that can be a source of lack of trust in one's social or physical environment or in oneself; the experience of separation between thoughts and</p> | <p>rehabilitation</p> <ul style="list-style-type: none"> <li>▪ Modelling of delivery, dose and method of sensory rehabilitation</li> <li>▪ Patient views regarding sensory rehabilitation</li> </ul> <p>To code patient-related factors to this domain there should be an underlying interpersonal process involved</p> | <p>very keen to have this happen" (Site 8_P5)</p> <p>"quite often it feels like it's up to individual therapists to ...to bring on change umm, but in order to do that, that requires a lot of energy...and effort" (Site 6_P3)<br/>[Construct: alienation]</p> <p>"There's often a confusion between motor and sensation, like sometimes they'll say [patient]'my muscles need to be stronger' but when you test it's very obvious that it's not actually a motor issue, it's well, it's more of a sensory impairment" (Site 6_P3)</p> |
|-------------------------------------------------------------------------------------------------------------------------------------------------------------------------------------------------------------------------------------------|---------------------------------------------------------------------------------------------------------------------------------------------------------------------------------------------------------------------------------------------------------------------------------------------------------------------------------------------------------------------------------------------------------------------------------------------------------------------------------------------------------------------------------------------------------------------------------------------------------------------------------------------------------------------------------------------------------------------------------------------------------------------------------------------------------------------------------------------------------------------------------------------------------------------------------------------------------------------------------------------------------------------------------------------------------------------------------------------------------------------------------------------------------------------------------------------------------------------------------------|-------------------------------------------------------------------------------------------------------------------------------------------------------------------------------------------------------------------------------------------------------------------------------------------------------------------------|-----------------------------------------------------------------------------------------------------------------------------------------------------------------------------------------------------------------------------------------------------------------------------------------------------------------------------------------------------------------------------------------------------------------------------------------------------------------------------------------------------------------------------------------|

1  
2  
3  
4  
5  
6  
7  
8  
9  
10  
11  
12  
13  
14  
15  
16  
17  
18  
19  
20  
21  
22  
23  
24  
25  
26  
27  
28  
29  
30  
31  
32  
33  
34  
35  
36  
37  
38  
39  
40  
41  
42  
43  
44  
45  
46

|                                                                                                                                                                                                                     |                                                                                                                                                                                                                                                                                                                                                                                                                                                                                                                                                                                                                                                                                                                                                                                                                              |                                                                                                                                                                                                                                                                                                                                                                                                                                                                                                            |                                                                                                                                                                                                                                                                                                                                                                                                                                                                                                               |
|---------------------------------------------------------------------------------------------------------------------------------------------------------------------------------------------------------------------|------------------------------------------------------------------------------------------------------------------------------------------------------------------------------------------------------------------------------------------------------------------------------------------------------------------------------------------------------------------------------------------------------------------------------------------------------------------------------------------------------------------------------------------------------------------------------------------------------------------------------------------------------------------------------------------------------------------------------------------------------------------------------------------------------------------------------|------------------------------------------------------------------------------------------------------------------------------------------------------------------------------------------------------------------------------------------------------------------------------------------------------------------------------------------------------------------------------------------------------------------------------------------------------------------------------------------------------------|---------------------------------------------------------------------------------------------------------------------------------------------------------------------------------------------------------------------------------------------------------------------------------------------------------------------------------------------------------------------------------------------------------------------------------------------------------------------------------------------------------------|
|                                                                                                                                                                                                                     | <p><i>feelings</i></p> <p><u>Group identity:</u> <i>the set of behavioural or personal characteristics by which an individual is recognizable [and portrays] as a member of a group</i></p> <p><u>Modeling:</u> <i>In developmental psychology the process in which one or more individuals or other entities serve as examples (models) that a child will copy</i></p>                                                                                                                                                                                                                                                                                                                                                                                                                                                      |                                                                                                                                                                                                                                                                                                                                                                                                                                                                                                            |                                                                                                                                                                                                                                                                                                                                                                                                                                                                                                               |
| <p><b>13. Emotion</b></p> <p>A complex reaction pattern, involving experiential, behavioural and physiological elements, by which the individual attempts to deal with a personally significant matter or event</p> | <p><u>Fear:</u> <i>An intense emotion aroused by the detection of imminent threat, involving an immediate alarm reaction that mobilizes the organism by triggering a set of physiological changes</i></p> <p><u>Anxiety:</u> <i>A mood state characterized by apprehension and somatic symptoms of tension in which an individual anticipates impending danger, catastrophe or misfortune.</i></p> <p><u>Affect:</u> <i>An experience or feeling of emotion, ranging from suffering to elation, from the simplest to the most complex sensations of feelings, and from the most normal to the most pathological emotional reactions.</i></p> <p><u>Stress:</u> <i>A state of physiological or psychological response to internal or external stressors</i></p> <p><u>Depression:</u> <i>A mental state that presents</i></p> | <p>Appropriate coding to this domain:</p> <ul style="list-style-type: none"> <li>▪ Discussion of emotions experienced by therapists towards providing sensory rehabilitation</li> <li>▪ Description of when therapists would be worried/concerned about providing sensory rehabilitation</li> </ul> <p>Inappropriate coding to this domain:</p> <ul style="list-style-type: none"> <li>▪ Description of patients' emotions regarding sensory rehabilitation (code to Social Influences instead)</li> </ul> | <p><i>"I feel a mix of excitement and scepticism, to be honest" (Site 3_P1)</i></p> <p><i>"I also feel a little bit nervous...with doing this amazing training and they'll be no one to use it on for 6 months and that makes me feel a bit nervous... when I finally get to that client, will I be ready?" (Site 8_P4)</i></p> <p><i>"there's a bit of trepidation around...needing to achieve a certain standard and being able to use a new tool and being able to... do it correctly" (Site 4_P3)</i></p> |



|                                                                                                                                 |                                                                                                                                                                                                                                                                                                                                                                                                                                                                                                                                                                                                                                                |                                                                                                                                                                                                                                                                                                                                                         |                                                                                                                                                                                                                                                                                                                                                                                                                                                                                                                                         |
|---------------------------------------------------------------------------------------------------------------------------------|------------------------------------------------------------------------------------------------------------------------------------------------------------------------------------------------------------------------------------------------------------------------------------------------------------------------------------------------------------------------------------------------------------------------------------------------------------------------------------------------------------------------------------------------------------------------------------------------------------------------------------------------|---------------------------------------------------------------------------------------------------------------------------------------------------------------------------------------------------------------------------------------------------------------------------------------------------------------------------------------------------------|-----------------------------------------------------------------------------------------------------------------------------------------------------------------------------------------------------------------------------------------------------------------------------------------------------------------------------------------------------------------------------------------------------------------------------------------------------------------------------------------------------------------------------------------|
|                                                                                                                                 | <p><i>with depressed mood, loss of interest or pleasure, feelings of guilt or low self-worth, disturbed sleep or appetite, low energy, and poor concentration</i></p> <p><u>Positive/negative affect:</u> <i>the internal feeling/state that occurs when a goal has/has not been attained. A source of threat has/has not been avoided, or the individual is/is not satisfied with the present state of affairs</i></p> <p><u>Burn-out:</u> <i>Physical, emotional or mental exhaustion, especially in one's job or career, accompanied by decreased motivation, lowered performance and negative attitudes towards oneself and others</i></p> |                                                                                                                                                                                                                                                                                                                                                         |                                                                                                                                                                                                                                                                                                                                                                                                                                                                                                                                         |
| <p><b>14. Behavioural regulation</b></p> <p>Anything aimed at managing or changing objectively observed or measured actions</p> | <p><u>Self-monitoring:</u> <i>A method used in behavioural management in which individuals keep a record of their behaviour, especially in connection with efforts to changes or regulate the self; a personality trait reflecting an ability to modify one's behaviour in response to a situation</i></p> <p><u>Breaking habit:</u> <i>to discontinue a behaviour or sequence of behaviours that is automatically activated by relevant situational cues</i></p> <p><u>Action planning:</u> <i>The action or process of</i></p>                                                                                                               | <p>Appropriate coding to this domain:</p> <ul style="list-style-type: none"> <li>▪ Discussion regarding habits and breaking old habits to allow for sensory rehabilitation</li> <li>▪ Self-regulatory strategies that would influence provision of sensory rehabilitation</li> <li>▪ Descriptions of auditing recommended for implementation</li> </ul> | <p><i>"am I going to mess it up and fall back to my old ways?" (Site 8_P7)</i></p> <p><i>"it's a big organisation, but here locally, it's quite small so changes will happen quite quickly." (Site 4_P10)</i></p> <p><i>"I think it's [change] something that's always possible but not necessarily always easy. I think sometimes it's really hard to change your practice and that might be for multiple reasons, maybe you've practised in that way for a long time or that's what you were taught in a particular course or</i></p> |

|  |                                                               |  |                                                                                                                                                                                                                                                                                                                                                                                                                                                                                                           |
|--|---------------------------------------------------------------|--|-----------------------------------------------------------------------------------------------------------------------------------------------------------------------------------------------------------------------------------------------------------------------------------------------------------------------------------------------------------------------------------------------------------------------------------------------------------------------------------------------------------|
|  | <p>forming a plan regarding a thing to be done or a deed.</p> |  | <p>at university and so with the new literature and research that's coming out and evidence-base, sometimes it's more difficult to take that on board" (Site 8_P1)</p> <p>I find on inpatient rehab where we've got more access to time I can introduce that and then we can go with, ok for 3 days a week for lower limbs and 2 days a week we work on lower limbs but we have access to seeing them everyday. <b>We can accommodate sometimes that way</b> (Site 6_P1) [Construct: Action planning]</p> |
|--|---------------------------------------------------------------|--|-----------------------------------------------------------------------------------------------------------------------------------------------------------------------------------------------------------------------------------------------------------------------------------------------------------------------------------------------------------------------------------------------------------------------------------------------------------------------------------------------------------|

Structure and definitions in codebook guided by:

Presseau J, Mutsaers B, Al-Jaishi AA, Squires, et al. (2017). Barriers and facilitators to healthcare professional behaviour change in clinical trials using the Theoretical Domains Framework: a case study of a trial of individualized temperature-reduced haemodialysis. *Trials*, 18(1), 227.

Bosch M, McKenzie JE, Ponsford JL, Turner S, et al. (2019). Evaluation of a targeted, theory-informed implementation intervention designed to increase uptake of emergency management recommendations regarding adult patients with mild traumatic brain injury: results of the NET cluster randomised trial. *Imp Sci*, 14(1), 4.

Michie, S., Atkins, L., & West, R. (2014). The behaviour change wheel. *A guide to designing interventions*. 1st ed. Great Britain: Silverback Publishing, 1003-1010.

## Appendix 3.

Study: Factors influencing allied health professionals' implementation of upper limb sensory rehabilitation for stroke survivors: A qualitative study to inform knowledge translation

### Normalisation Process Theory (NPT) Codebook

| Construct 1: COHERENCE "Making sense of it"                                                                                                                                                                                                            |                                                                             |                                                                                                                                                                                                                                                                                                                                                                                                       |                                                                                                                                                                                                                                                                                                                                                                                                                                                                                                                                             |
|--------------------------------------------------------------------------------------------------------------------------------------------------------------------------------------------------------------------------------------------------------|-----------------------------------------------------------------------------|-------------------------------------------------------------------------------------------------------------------------------------------------------------------------------------------------------------------------------------------------------------------------------------------------------------------------------------------------------------------------------------------------------|---------------------------------------------------------------------------------------------------------------------------------------------------------------------------------------------------------------------------------------------------------------------------------------------------------------------------------------------------------------------------------------------------------------------------------------------------------------------------------------------------------------------------------------------|
| Coherence is the sense-making work that people do individually & collectively when faced with the problem of operationalizing some set of practices.<br><i>What knowledge, skills, behaviours, actors and actions are required to implement SENSE?</i> |                                                                             |                                                                                                                                                                                                                                                                                                                                                                                                       |                                                                                                                                                                                                                                                                                                                                                                                                                                                                                                                                             |
| Component                                                                                                                                                                                                                                              | Definition                                                                  | Guidance                                                                                                                                                                                                                                                                                                                                                                                              | Sample quotes                                                                                                                                                                                                                                                                                                                                                                                                                                                                                                                               |
| <b>Differentiation</b><br><br><u>Understanding the uniqueness of it</u><br><i>Does the therapist recognize the SENSE approach as different from their existing ways of working?</i>                                                                    | How a set of practices and their objects are different from each other      | <u>Appropriate coding</u> to this construct component: <ul style="list-style-type: none"> <li>Understanding the differences between informal and standardised sensory Axs</li> <li>Understanding the differences between other and past sensory rehabilitation approaches and SENSE therapy</li> </ul> <u>Inappropriate coding</u> : views on effectiveness of SENSE (code to communal specification) | <i>"I do assess sensation and I do treat sensation but I don't actually use any of those <b>formalised things</b>" (Site 3_P5)</i><br><br><i>"it's all about <b>compensating</b> for something and educating a patient or their family rather than actually taking the time to retrain" (Site 1_P7)</i>                                                                                                                                                                                                                                     |
| <b>Individual specification</b><br><br><u>Individually interpreting it:</u><br><i>Does the therapist identify their personal role and responsibilities with using SENSE?</i>                                                                           | Understanding specific tasks and responsibilities around a set of practices | <u>Appropriate coding</u> to this construct component: <ul style="list-style-type: none"> <li>Individual tasks a therapist needs to do to understand and start using SENSE Assess and SENSE therapy</li> </ul>                                                                                                                                                                                        | <i>"it's helpful having that structure as well of the study...there's some ownership you have to take, the responsibility you have to take to <b>actually use the assessments</b>" (Site 7_P10)</i><br><br><i>"I think the hard thing for me is because I did go to a SENSE workshop, I know that there is so much more that could be done and with us not having the equipment, <b>it's a matter perhaps making do with the principles</b> but you...but like just knowing that's there's so much more that could be done" (Site 4_P2)</i> |
| <b>Communal specification</b><br><br><u>Collectively interpreting</u>                                                                                                                                                                                  | Building a shared understanding                                             | <u>Appropriate coding</u> to this construct component: <ul style="list-style-type: none"> <li>The development of a group or department</li> </ul>                                                                                                                                                                                                                                                     | <i>"I suppose, you know, if it (SENSE therapy) <b>needs a lot of kind of one-on-one focus</b>, that might be a problem." (Site 4_P1)</i><br><br><i>"It feels more old-fashioned not to empower them to go away</i>                                                                                                                                                                                                                                                                                                                          |

|                                                                                                                                                                                                               |                                                                                           |                                                                                                                                                                                                                        |                                                                                                                                                                                                                                                                                                                                                                                                                                                                                                                                                                                                                                                                                                                                                                                                                                                                             |
|---------------------------------------------------------------------------------------------------------------------------------------------------------------------------------------------------------------|-------------------------------------------------------------------------------------------|------------------------------------------------------------------------------------------------------------------------------------------------------------------------------------------------------------------------|-----------------------------------------------------------------------------------------------------------------------------------------------------------------------------------------------------------------------------------------------------------------------------------------------------------------------------------------------------------------------------------------------------------------------------------------------------------------------------------------------------------------------------------------------------------------------------------------------------------------------------------------------------------------------------------------------------------------------------------------------------------------------------------------------------------------------------------------------------------------------------|
| <p>1 <i>it:</i><br/>2 <i>Does the therapist</i><br/>3 <i>recognise the steps</i><br/>4 <i>needed to assist in the</i><br/>5 <i>integration of SENSE?</i></p>                                                  | <p>of aims, objectives,<br/>and expected<br/>benefits of a set of<br/>practices.</p>      | <p>understanding of SENSE Assess and SENSE therapy</p> <ul style="list-style-type: none"> <li>▪ A group trying to identify and anticipate how SENSE Assess and SENSE therapy will fit with current practice</li> </ul> | <p><i>and train the carer to do the program with a client, we don't do a lot of stuff to people..." (Site 3_P1)</i></p> <p><i>"also with the intensity with which we provide therapy, I feel like we, it's so much less than what is in the SENSE study and even though I am aware of it, and I just can't imagine how I can give that intensity to a client" (Site 7_P8)</i></p>                                                                                                                                                                                                                                                                                                                                                                                                                                                                                           |
| <p>10 <b>Internalization</b><br/>11<br/>12 <u>Coming to a conclusion:</u><br/>13 <i>Does the therapist</i><br/>14 <i>identify any benefit</i><br/>15 <i>in adopting the SENSE</i><br/>16 <i>approach?</i></p> | <p>Understanding the<br/>value, benefits and<br/>importance of a set<br/>of practices</p> | <p>Appropriate coding to this construct component:</p> <ul style="list-style-type: none"> <li>▪ Understanding the value, benefits and importance of SENSE Assess and SENSE therapy</li> </ul>                          | <p><i>"I guess the impression is that the <b>treatment approach works</b> so that is what I'm basing my enthusiasm on that it is actually going to improve people's sensation and translate into their function" (Site 2_P3)</i></p> <p><i>"well we also have a lot of people here...there's a sense that (laughs) well, there's a sense the SENSE is valuable" (Site 7_P8)</i></p> <p><i>"because the loss of sensation does have such huge impact on people's function and I think to be able to implement something that is going to make a huge difference for patients is really exciting, regardless of how that is actually put in place" (Site 4_P2)</i></p> <p><i>"but also at the back of my mind going, how long do all of these assessments take and ....<b>would they actually assess everything that I need to know for my patients.</b>" (Site 7_P7)</i></p> |

**Construct 2: COGNITIVE PARTICIPATION** 'Enrolment and **engagement** of individuals and groups' "Working out participation"

**Cognitive Participation** is the **relational work** that people do to build and sustain a community of practice around a new technology or complex intervention. **Do participants view the intervention as something worthwhile and appropriate to commit their individual time and effort [signing up] to bring about the intended outcome?**

| Component                                                                                                                                                                                                                   | Definition                                                               | Guidance                                                                                                                                                                                                    | Sample quotes                                                                                                                                                                                                                                                                                                                    |
|-----------------------------------------------------------------------------------------------------------------------------------------------------------------------------------------------------------------------------|--------------------------------------------------------------------------|-------------------------------------------------------------------------------------------------------------------------------------------------------------------------------------------------------------|----------------------------------------------------------------------------------------------------------------------------------------------------------------------------------------------------------------------------------------------------------------------------------------------------------------------------------|
| <p>36 <b>Initiation</b><br/>37 <u>Having the skills to</u><br/>38 <u>engage</u><br/>39 <i>To what extent does the</i><br/>40 <i>therapist appear</i><br/>41 <i>to be a supporter of the</i><br/>42 <i>intervention?</i></p> | <p>Whether or not users are working to drive an intervention forward</p> | <p>Appropriate coding to this construct component:</p> <ul style="list-style-type: none"> <li>▪ The work done to setup systems and procedures to allow the use of SENSE Assess and SENSE therapy</li> </ul> | <p><i>"we're getting training...we're getting kits.. we're getting the assessment tools and..we all would know about it I think helps me to feel more able to do something a lot more formally and a lot more structured way" (Site 7_P7)</i></p> <p><i>"And...if we did need to see our client more than what our usual</i></p> |

|                                                                                                                                                                                                                                                                                                                                                                                                                                                                                                                                                                                                      |                                                                                                                               |                                                                                                                                                                                                                                                                                                                                                                                  |                                                                                                                                                                                                                                                                                                                                                                    |
|------------------------------------------------------------------------------------------------------------------------------------------------------------------------------------------------------------------------------------------------------------------------------------------------------------------------------------------------------------------------------------------------------------------------------------------------------------------------------------------------------------------------------------------------------------------------------------------------------|-------------------------------------------------------------------------------------------------------------------------------|----------------------------------------------------------------------------------------------------------------------------------------------------------------------------------------------------------------------------------------------------------------------------------------------------------------------------------------------------------------------------------|--------------------------------------------------------------------------------------------------------------------------------------------------------------------------------------------------------------------------------------------------------------------------------------------------------------------------------------------------------------------|
| <p>1 <i>process to integrate</i><br/>2 <i>SENSe?</i></p>                                                                                                                                                                                                                                                                                                                                                                                                                                                                                                                                             |                                                                                                                               | <ul style="list-style-type: none"> <li>▪ The engagement with others to introduce SENSe</li> </ul>                                                                                                                                                                                                                                                                                | <p><i>is, which is once a week, then that would be agreed, if we could justify it" (Site 3_P3)</i></p>                                                                                                                                                                                                                                                             |
| <p>6 <b>Enrolment</b><br/>7 <u>Organising people</u><br/>8 <i>Has the therapist made</i><br/>9 <i>any adaptations or</i><br/>10 <i>assisted in the</i><br/>11 <i>reorganisation process</i><br/>12 <i>leading</i><br/>13 <i>to implementation?</i></p>                                                                                                                                                                                                                                                                                                                                               | <p>The work users do to organise themselves and their co-workers to participate in the new practice.</p>                      | <p>Appropriate coding to this construct component:</p> <ul style="list-style-type: none"> <li>▪ Therapists ‘buy-in’ towards SENSe</li> <li>▪ The building of communal engagement towards SENSe</li> </ul>                                                                                                                                                                        | <p><i>"I would like us to be known as a centre of excellence and to be able to provide it (SENSe)" (Site 5_P1)</i></p> <p><i>"Maybe we can co-treat together" (Site 7_P8)</i></p>                                                                                                                                                                                  |
| <p>16 <b>Legitimation</b><br/>17 <u>Believing practice is</u><br/>18 <u>valid</u><br/>19 <i>Does the therapist</i><br/>20 <i>believe that it is</i><br/>21 <i>appropriate for them to</i><br/>22 <i>be involved in</i><br/>23 <i>integrating SENSe?</i></p>                                                                                                                                                                                                                                                                                                                                          | <p>Users’ belief that the practice is right for them in their context, and that they can make a valid contribution to it.</p> | <p><u>Appropriate coding</u> to this construct component:</p> <ul style="list-style-type: none"> <li>▪ The role of OT/PT in sensory rehabilitation</li> <li>▪ The contribution therapists feel they can make</li> </ul> <p><u>Inappropriate coding</u> to this domain:</p> <ul style="list-style-type: none"> <li>▪ Who does the work (code to Skill set workability)</li> </ul> | <p><i>"For me it’s more about the scale of prioritisation... is it [SENSe] what they should be doing out amongst all of all their other priorities?" (Site 7_P2)</i></p> <p><i>"in terms of the other disciplines, they look to us (OT) as an expert in this area, and there’s a very uncomfortable feeling" (Site 8_P7)</i></p>                                   |
| <p>26 <b>Activation</b><br/>27 <u>Defining actions</u><br/>28 <i>Has the therapist taken</i><br/>29 <i>steps to sustain the use</i><br/>30 <i>of SENSe?</i></p>                                                                                                                                                                                                                                                                                                                                                                                                                                      | <p>Collectively defining the actions and procedures needed to sustain a practice and to stay involved.</p>                    | <p>Appropriate coding to this construct component:</p> <ul style="list-style-type: none"> <li>▪ The sustainability of SENSe</li> <li>▪ The visibility of SENSe in the organisation</li> <li>▪ The ongoing connection between SENSe and those who should use it</li> </ul>                                                                                                        | <p><i>"I just feel a bit unsure how it’s going to be carried out, and if it’s... sustainable across the service." (Site 7_P3)</i></p> <p><i>"Handing that over to the AHA might not meet the criteria of the study, so I think... once we have done the study, we might be able to think about using our AHAs a bit more effectively for that" (Site 7_P8)</i></p> |
| <p>37 <b>Construct 3: COLLECTIVE ACTION ‘Work done to enable the intervention to happen’</b></p>                                                                                                                                                                                                                                                                                                                                                                                                                                                                                                     |                                                                                                                               |                                                                                                                                                                                                                                                                                                                                                                                  |                                                                                                                                                                                                                                                                                                                                                                    |
| <p>38 <b>Collective Action</b> is the <b>operational work</b> that people do to enact a set of practices, whether these represent a new technology or complex healthcare intervention. <i>How far will</i><br/>39 <i>existing work practices and the division of labour have to be changed or adapted to implement SENSe? Is SENSe consistent with the existing norms and goals of the groups, the</i><br/>40 <i>workplace and overall organization?</i><br/>41 <b>** Coding to this construct needs to involve a therapist talking about ‘doing’ or intended ‘doing’ related to using SENSe</b></p> |                                                                                                                               |                                                                                                                                                                                                                                                                                                                                                                                  |                                                                                                                                                                                                                                                                                                                                                                    |

| Component                                                                                                                                                                                                             | Definition                                                                                                                                | Guidance                                                                                                                                                                                                                                                                                                                                                                             | Sample quotes                                                                                                                                                                                                                                                                                                                                                                                                                                                                                                                          |
|-----------------------------------------------------------------------------------------------------------------------------------------------------------------------------------------------------------------------|-------------------------------------------------------------------------------------------------------------------------------------------|--------------------------------------------------------------------------------------------------------------------------------------------------------------------------------------------------------------------------------------------------------------------------------------------------------------------------------------------------------------------------------------|----------------------------------------------------------------------------------------------------------------------------------------------------------------------------------------------------------------------------------------------------------------------------------------------------------------------------------------------------------------------------------------------------------------------------------------------------------------------------------------------------------------------------------------|
| <p><b>Interactional workability</b></p> <p><i>Performing the actions</i><br/> <i>What work does the therapist do with others to operationalise the use of the SENSE approach?</i></p>                                 | <p>Interactional work people do to operationalize the practice in everyday settings</p>                                                   | <p>Appropriate coding to this construct component:</p> <ul style="list-style-type: none"> <li>Interaction between therapists in the use of SENSE and SENSE equipment to put them into use</li> </ul> <p><u>Inappropriate coding</u> to this domain:</p> <ul style="list-style-type: none"> <li>Division of labour related to use of SENSE (code to Skill set Workability)</li> </ul> | <p><i>“that might be the benefit of this study that it...encourages co-assessments and co-treatments so that we’re both (OT &amp; PT) learning together really, which I think gives us benefit.” (Site 6_P3)</i></p> <p><i>“so I guess looking at across OT and physio how you can work together to try and implement the amount that you would need to, to change” (Site 3_P3)</i></p>                                                                                                                                                |
| <p><b>Relational integration</b></p> <p><i>Working with and trusting the work of others (and SENSE as an intervention)</i><br/> <i>To what extent does the integration of SENSE help or impede people’s work?</i></p> | <p>Knowledge work people do to build accountability and maintain confidence in a set of practices and in each other as they use them.</p> | <p>Appropriate coding to this construct component:</p> <ul style="list-style-type: none"> <li>The confidence therapists have in SENSE and its ability to detect and treat sensory loss in stroke survivors</li> </ul>                                                                                                                                                                | <p><i>“we would actually articulate and educate your patients well to try and do the [SENSE] principles, I hope then then yes, and the outcomes will be better” (Site 7_P9)</i></p>                                                                                                                                                                                                                                                                                                                                                    |
| <p><b>Contextual integration</b></p> <p><i>Allocating resources</i><br/> <i>Does the integration of SENSE fit with the objectives of the organisation/ individual?</i></p>                                            | <p>Managing a set of practices through allocation of resources, execution of protocols, policies and procedures.</p>                      | <p>Appropriate coding to this construct component:</p> <ul style="list-style-type: none"> <li>The management of the health service (staff, resources) to allow for delivery of SENSE</li> </ul>                                                                                                                                                                                      | <p><i>“you’re not going to spend a lot of time assessing someone if you can’t actually treat them...that would probably lead to someone thinking I’ll let that go for home-based therapy or outpatient therapy” (Site 3_P2)</i></p> <p><i>“we have grade one rotations and OTs who rotate every 6 months...obviously someone else who is going on maternity leave...if we have new people coming in that means we have to train them as well so that they can use the equipment so I guess can be a bit difficult” (Site 8_P6)</i></p> |
| <p><b>Skill set workability</b></p>                                                                                                                                                                                   | <p>The allocation work that underpins the</p>                                                                                             | <p>Appropriate coding to this construct</p>                                                                                                                                                                                                                                                                                                                                          | <p><i>“if it’s an assessment [SENSE] that both can do...if the physio is</i></p>                                                                                                                                                                                                                                                                                                                                                                                                                                                       |



|                                                                                                                                                                                                                                                                                                                                                                                                        |                                                                                                                          |                                                                                                                                                                                                                   |                                                                                                                                                                                                                                                                                                                                       |
|--------------------------------------------------------------------------------------------------------------------------------------------------------------------------------------------------------------------------------------------------------------------------------------------------------------------------------------------------------------------------------------------------------|--------------------------------------------------------------------------------------------------------------------------|-------------------------------------------------------------------------------------------------------------------------------------------------------------------------------------------------------------------|---------------------------------------------------------------------------------------------------------------------------------------------------------------------------------------------------------------------------------------------------------------------------------------------------------------------------------------|
| <p>1 <u>Appropriate division of tasks</u><br/>2 Who does the therapist view as being best placed to make use of the SENSE approach?<br/>3<br/>4<br/>5<br/>6<br/>7<br/>8 How compatible is the SENSE approach with their current tasks?<br/>9<br/>10<br/>11</p>                                                                                                                                         | <p>division of labour that is built up around a set of practices</p>                                                     | <p>component:<br/>▪ Who does the work related to the use of SENSE?<br/><br/>*Related to Legitimation – see point on difference above</p>                                                                          | <p>too busy the OT can help out or vice versa. We can all help with the time management side of things” (Site 4_P1)<br/><br/>“I’ll communicate with the OT and I would probably have a list of other priorities this big and I’ll go “Great! The OT can do this, one less thing for me to worry about!” (Site 4_P1)</p>               |
| <p>12 <b>REFLEXIVE MONITORING</b> ‘formal and informal appraisal of benefits and costs of the intervention’</p>                                                                                                                                                                                                                                                                                        |                                                                                                                          |                                                                                                                                                                                                                   |                                                                                                                                                                                                                                                                                                                                       |
| <p>13 <b>Reflexive Monitoring</b> is the <b>appraisal work</b> that people do to assess and understand the ways that a new set of practices affect them and others around them. <i>What is the informal and formal appraisal of SENSE and its benefits for participants?</i><br/>14<br/>15 <b>** Coding to this construct needs to involve a therapist reflecting on the ‘doing’/ use of SENSE</b></p> |                                                                                                                          |                                                                                                                                                                                                                   |                                                                                                                                                                                                                                                                                                                                       |
| <p>16 Component</p>                                                                                                                                                                                                                                                                                                                                                                                    | <p>Definition</p>                                                                                                        | <p>Guidance</p>                                                                                                                                                                                                   | <p>Sample quotes</p>                                                                                                                                                                                                                                                                                                                  |
| <p>17<br/>18 <b>Systematization</b><br/>19<br/>20 <u>Collecting feedback information</u><br/>21 Has the therapist taken practical steps to measure the influence of adopting the new techniques?<br/>22<br/>23<br/>24<br/>25<br/>26<br/>27<br/>28</p>                                                                                                                                                  | <p>Collecting information to determine the effectiveness and utility of an intervention</p>                              | <p>Appropriate coding to this construct component:<br/>▪ Formal (e.g. RCT) or informal (anecdotal) sources of information on how effective &amp; useful SENSE is<br/><br/>From discussion with AM: e.g. audit</p> | <p>“in my limited experience and treatment that I’ve used some of the SENSE practices with, <b>I’ve had really significant outcomes</b> so I’m keen to apply it more broadly I guess across the board rather than just the ones that are really severe...sensory issues and see what sort of outcomes we might have.” (Site 3_P2)</p> |
| <p>29<br/>30 <b>Communal appraisal</b><br/>31 <u>Collectively evaluating it</u><br/>32 Are there any joint efforts to appraise the impact of implementation?<br/>33<br/>34<br/>35<br/>36<br/>37</p>                                                                                                                                                                                                    | <p>Participants working together to evaluate the worth of a set of practices.</p>                                        | <p>Appropriate coding to this construct component:<br/>▪ Therapists asking each other ‘Is SENSE working?’<br/>▪ Communal appraisal of SENSE</p>                                                                   | <p>* Likely to be more relevant at end of implementation</p>                                                                                                                                                                                                                                                                          |
| <p>38<br/>39<br/>40 <b>Individual appraisal</b><br/>41 <u>Individually evaluating it</u><br/>42</p>                                                                                                                                                                                                                                                                                                    | <p>Participants working experientially as individuals to appraise the practice’s effects on them and the contexts in</p> | <p>Appropriate coding to this construct component:<br/>▪ Therapists individual appraisal of</p>                                                                                                                   | <p>* Likely to be more relevant at end of implementation</p>                                                                                                                                                                                                                                                                          |

|                                                                                                                                                                                                                                       |                                                                                    |                                                                                                                                                            |                                                              |
|---------------------------------------------------------------------------------------------------------------------------------------------------------------------------------------------------------------------------------------|------------------------------------------------------------------------------------|------------------------------------------------------------------------------------------------------------------------------------------------------------|--------------------------------------------------------------|
| <p>1 Does the therapist<br/>2 reflect personally on the<br/>3 impact of the SENSE<br/>4 approach on his/her<br/>5 routine?</p>                                                                                                        | <p>which they are set.</p>                                                         | <p>the worth of SENSE and the impact on<br/>other work tasks</p>                                                                                           |                                                              |
| <p>7 <b>Reconfiguration</b><br/>8 Changing the way<br/>9 things are done<br/>10 Has the therapist made<br/>11 attempts to<br/>12 modify the way the<br/>13 SENSE approach<br/>14 is used as a result of<br/>15 experience?<br/>16</p> | <p>Appraisal work done by users to<br/>redefine procedures or modify practices</p> | <p>Appropriate coding to this construct<br/>component:<br/>▪ Changes to the delivery of SENSE<br/>therapists make to allow it to fit with<br/>practice</p> | <p>* Likely to be more relevant at end of implementation</p> |

21 *Structure and definitions in codebook guided by:*

23 May C, Finch T. (2009). Implementing, embedding, and integrating practices: an outline of normalization process theory. *Sociology*, 43(3), 535-554.

25 Sutton E, Herbert G, Burden S, Lewis S, et al. (2018) Using the Normalization Process Theory to qualitatively explore sense-making in implementation of the Enhanced Recovery After Surgery programme: "It's not rocket science" PLoS ONE 13(4): e0195890.

29 Murray E, Treweek S, Pope C, MacFarlane A. et al. (2010). Normalisation process theory: a framework for developing, evaluating and implementing complex interventions. *BMC med*, 8(1), 63.

32 Alverbratt C, Carlström E, Åström S, Kauffeldt A et al. (2014). The process of implementing a new working method—a project towards change in a Swedish psychiatric clinic. *J Hosp Admin*, 3(6), 174.

36 Kennedy A, Rogers A, Chew-Graham C, Blakeman T et al. (2014). Implementation of a self-management support approach (WISE) across a health system: a process evaluation explaining what did and did not work for organisations, clinicians and patients. *Imp Sci*, 9(1), 129.

39 Clarke DJ, Hawkins R, Sadler E, Harding G et al. (2014). Introducing structured caregiver training in stroke care: findings from the TRACS process evaluation study. *BMJ Open*, 4(4), e004473.



1  
2  
3  
4  
5  
6  
7  
8  
9  
10  
11  
12  
13  
14  
15  
16  
17  
18  
19  
20  
21  
22  
23  
24  
25  
26  
27  
28  
29  
30  
31  
32  
33  
34  
35  
36  
37  
38  
39  
40  
41  
42  
43  
44  
45  
46

McNaughton RJ, Steven A, Shucksmith J. (2019). Using Normalization Process Theory as a practical tool across the life course of a qualitative research project. *Qual health res*, 1049732319863420.

For peer review only

## Appendix 4.

Study: Factors influencing allied health professionals' implementation of upper limb sensory rehabilitation for stroke survivors: A qualitative study to inform knowledge translation

### Number of quotes coded to Theoretical Domains Framework and Normalisation Process Theory domains and categories

*Theoretical Domains Framework (TDF):*

| TDF Domain                                        | SITE   |        |        |        |        |        |        |        |
|---------------------------------------------------|--------|--------|--------|--------|--------|--------|--------|--------|
|                                                   | Site 1 | Site 2 | Site 3 | Site 4 | Site 5 | Site 6 | Site 7 | Site 8 |
| <b>Knowledge</b>                                  | 5      | 3      | 7      | 7      | 13     | 6      | 15     | 13     |
| <b>Skills</b>                                     | 5      | 6      | 10     | 9      | 7      | 9      | 6      | 18     |
| <b>Social/Prof Role and Identity</b>              | 9      | 16     | 15     | 22     | 19     | 23     | 7      | 20     |
| <b>Beliefs about capabilities</b>                 | 4      | 3      | 4      | 1      | 8      | 12     | 4      | 12     |
| <b>Optimism</b>                                   | 3      | 8      | 7      | 3      | 8      | 1      | 14     | 11     |
| <b>Beliefs about consequences</b>                 | 7      | 7      | 4      | 12     | 3      | 6      | 15     | 17     |
| <b>Reinforcement</b>                              | 3      | 1      | 1      | 5      | 4      | 5      | 1      | 6      |
| <b>Intentions</b>                                 | 2      | 6      | 4      | 13     | 4      | 9      | 5      | 15     |
| <b>Goals</b>                                      | 5      | 6      | 4      | 4      | 7      | 5      | 0      | 10     |
| <b>Memory, attention &amp; decision processes</b> | 3      | 3      | 4      | 3      | 6      | 7      | 4      | 3      |
| <b>Environmental context and resources</b>        | 41     | 38     | 52     | 45     | 36     | 40     | 56     | 77     |
| <b>Social influences</b>                          | 9      | 6      | 8      | 4      | 10     | 24     | 13     | 11     |
| <b>Emotion</b>                                    | 8      | 1      | 8      | 7      | 5      | 9      | 4      | 14     |
| <b>Behavioural regulation</b>                     | 3      | 1      | 1      | 4      | 0      | 3      | 1      | 3      |

\* Green/shaded numbers indicate three domains coded to most frequently at each site

1  
2  
3  
4  
5  
6 *Normalisation Process Theory (NPT):*  
7

|                                | SITE   |        |        |        |        |        |        |        |
|--------------------------------|--------|--------|--------|--------|--------|--------|--------|--------|
| NPT Category and Construct     | Site 1 | Site 2 | Site 3 | Site 4 | Site 5 | Site 6 | Site 7 | Site 8 |
| <b>COHERENCE</b>               |        |        |        |        |        |        |        |        |
| Differentiation                | 6      | 3      | 10     | 7      | 7      | 4      | 17     | 10     |
| Individual specification       | 14     | 3      | 14     | 3      | 11     | 5      | 10     | 14     |
| Communal specification         | 5      | 3      | 7      | 8      | 6      | 4      | 7      | 10     |
| Internalisation                | 7      | 9      | 15     | 15     | 11     | 6      | 8      | 15     |
| <b>COGNITIVE PARTICIPATION</b> |        |        |        |        |        |        |        |        |
| Initiation                     | 4      | 8      | 6      | 8      | 5      | 4      | 10     | 5      |
| Enrolment                      | 4      | 4      | 5      | 3      | 6      | 11     | 6      | 9      |
| Legitimation                   | 15     | 10     | 14     | 11     | 12     | 11     | 14     | 16     |
| Activation                     | 2      | 0      | 4      | 8      | 6      | 2      | 2      | 5      |
| <b>COLLECTIVE ACTION</b>       |        |        |        |        |        |        |        |        |
| Interactional workability      | 4      | 1      | 3      | 1      | 4      | 0      | 3      | 7      |
| Relational integration         | 3      | 0      | 3      | 2      | 0      | 1      | 2      | 2      |
| Contextual integration         | 7      | 0      | 5      | 2      | 1      | 2      | 3      | 8      |
| Skill set workability          | 5      | 0      | 1      | 2      | 0      | 3      | 1      | 0      |
| <b>REFLEXIVE MONITORING</b>    |        |        |        |        |        |        |        |        |
| Systematization                | 0      | 0      | 0      | 0      | 1      | 0      | 0      | 0      |
| Communal appraisal             | 0      | 0      | 0      | 0      | 0      | 0      | 0      | 0      |

1  
2  
3  
4  
5  
6  
7  
8  
9  
10  
11  
12  
13  
14  
15  
16  
17  
18  
19  
20  
21  
22  
23  
24  
25  
26  
27  
28  
29  
30  
31  
32  
33  
34  
35  
36  
37  
38  
39  
40  
41  
42  
43  
44  
45  
46

|                      |   |   |   |   |   |   |   |   |
|----------------------|---|---|---|---|---|---|---|---|
| Individual appraisal | 0 | 0 | 3 | 1 | 1 | 0 | 1 | 1 |
| Reconfiguration      | 0 | 0 | 0 | 0 | 0 | 0 | 0 | 0 |

\* Green/shaded numbers indicate three domains coded to most frequently at each site

For peer review only

## Consolidated criteria for reporting qualitative studies (COREQ): 32-item checklist

| No                                             | Item                                     | Guide Questions/Description                                                                                                                      | Reported on Page No. / Comment                                                                                                                                              |
|------------------------------------------------|------------------------------------------|--------------------------------------------------------------------------------------------------------------------------------------------------|-----------------------------------------------------------------------------------------------------------------------------------------------------------------------------|
| <b>Domain 1: Research team and reflexivity</b> |                                          |                                                                                                                                                  |                                                                                                                                                                             |
| <b>Personal Characteristics</b>                |                                          |                                                                                                                                                  |                                                                                                                                                                             |
| 1                                              | Interviewer/facilitator                  | Which author/s conducted the interview or focus group?                                                                                           | Page 8. Liana S Cahill (LSC) and Yvonne Mak-Yuen (YMY) conducted focus groups and interviews.                                                                               |
| 2                                              | Credentials                              | What were the researcher's credentials?                                                                                                          | Page 9. Credentials of LSC and YMY detailed under 'Research Team and Reflexivity'                                                                                           |
| 3                                              | Occupation                               | What was their occupation at the time of the study?                                                                                              | Page 9. LSC and YMY noted to be research occupational therapists under 'Research Team and Reflexivity'                                                                      |
| 4                                              | Gender                                   | Was the researcher male or female?                                                                                                               | Page 9. Researchers female as noted by female pronouns.                                                                                                                     |
| 5                                              | Experience and training                  | What experience or training did the researcher have?                                                                                             | Page 9. Professional training and background of researchers noted under 'Research Team and Reflexivity'                                                                     |
| <b>Relationship with participants</b>          |                                          |                                                                                                                                                  |                                                                                                                                                                             |
| 6                                              | Relationship established                 | Was a relationship established prior to study commencement?                                                                                      | Not for the purposes of the study. It is noted LSC previously worked with some participants, but not at the time of the study – see Page 9, 'Research Team and Reflexivity' |
| 7                                              | Participant knowledge of the interviewer | What did the participants know about the researcher? <i>e.g. personal goals, reasons for doing the research</i>                                  | Participants were aware LSC and YMY were completing their doctorates in somatosensory rehabilitation. See Page 9, 'Research Team and Reflexivity'.                          |
| 8                                              | Interviewer characteristics              | What characteristics were reported about the interviewer/facilitator? <i>e.g. Bias, assumptions, reasons and interests in the research topic</i> | Participants were likely aware of the interviewers' special interest in somatosensory rehabilitation stemming from                                                          |

|                               |                                       |                                                                                                                                                          |                                                                                                                                                            |
|-------------------------------|---------------------------------------|----------------------------------------------------------------------------------------------------------------------------------------------------------|------------------------------------------------------------------------------------------------------------------------------------------------------------|
|                               |                                       |                                                                                                                                                          | clinical practice. See Page 9, 'Research Team and Reflexivity'.                                                                                            |
| <b>Domain 2: study design</b> |                                       |                                                                                                                                                          |                                                                                                                                                            |
| <b>Theoretical framework</b>  |                                       |                                                                                                                                                          |                                                                                                                                                            |
| 9                             | Methodological orientation and Theory | What methodological orientation was stated to underpin the study? e.g. grounded theory, discourse analysis, ethnography, phenomenology, content analysis | Page 10-11. Thematic analysis and use of two theoretical frameworks (Theoretical Domains Theory and Normalisation Process Theory) is described.            |
| <b>Participant selection</b>  |                                       |                                                                                                                                                          |                                                                                                                                                            |
| 10                            | Sampling                              | How were participants selected? e.g. purposive, convenience, consecutive, snowball                                                                       | Page 8. Purposive recruitment of therapists to the study is described, see 'Participants'                                                                  |
| 11                            | Method of approach                    | How were participants approached? e.g. face-to-face, telephone, mail, email                                                                              | Page 8. Approach to health organisations via telephone and email and approach to therapists via face-to-face presentations described, see 'Participants'   |
| 12                            | Sample size                           | How many participants were in the study?                                                                                                                 | Page 11. Eighty seven occupational therapists and physiotherapists participated. See 'Findings'                                                            |
| 13                            | Non-participation                     | How many people refused to participate or dropped out? Reasons?                                                                                          | Page 8. All therapists attending recruitment presentations agreed to participate. No refusals or drop-outs occurred. See 'Participants'                    |
| <b>Setting</b>                |                                       |                                                                                                                                                          |                                                                                                                                                            |
| 14                            | Setting of data collection            | Where was the data collected? e.g. home, clinic, workplace                                                                                               | Page 8. Focus groups were held at therapists' health organisations. Separate interviews were held over the phone for those unable to attend. See 'Design'. |
| 15                            | Presence of non-participants          | Was anyone else present besides the participants and researchers?                                                                                        | Page 8. No. Two members of the research team (LSC and YMY) attended focus groups,                                                                          |

|                        |                        |                                                                                   |                                                                                                                                                                                                                                                                       |
|------------------------|------------------------|-----------------------------------------------------------------------------------|-----------------------------------------------------------------------------------------------------------------------------------------------------------------------------------------------------------------------------------------------------------------------|
|                        |                        |                                                                                   | no one else was present besides participants. See 'Design'.                                                                                                                                                                                                           |
| 16                     | Description of sample  | What are the important characteristics of the sample? e.g. demographic data, date | Page 8. Participants were graduate occupational therapists and physiotherapists who worked with stroke survivors at participating health organisations. See 'Participants'. A demographics table describing characteristics of participants is provided, see Table 1. |
| <b>Data collection</b> |                        |                                                                                   |                                                                                                                                                                                                                                                                       |
| 17                     | Interview guide        | Were questions, prompts, guides provided by the authors? Was it pilot tested?     | Page 8. Interview questions are provided in Appendix 1 and were guided by the Theoretical Domains Framework. Questions were not formally pilot tested but were discussed with the research group. See 'Design'.                                                       |
| 18                     | Repeat interviews      | Were repeat interviews carried out? If yes, how many?                             | Repeat interviews were not conducted, though individuals who missed original focus groups were followed up in individual or small group interviews.                                                                                                                   |
| 19                     | Audio/visual recording | Did the research use audio or visual recording to collect the data?               | Page 8. Interviews were audio-recorded. See 'Design'                                                                                                                                                                                                                  |
| 20                     | Field notes            | Were field notes made during and/or after the interview or focus group?           | Page 8. Field notes were taken during and after each interview. See 'Design'                                                                                                                                                                                          |
| 21                     | Duration               | What was the duration of the interviews or focus group?                           | Page 8. Focus groups were of 1-hour duration. See 'Design'.                                                                                                                                                                                                           |
| 22                     | Data saturation        | Was data saturation discussed?                                                    | Data saturation considered, n=87 therapists across 8 different health organisation was aimed to provide a representative sample                                                                                                                                       |

|                                 |                                |                                                                                                                                        |                                                                                                                                                                                                                               |
|---------------------------------|--------------------------------|----------------------------------------------------------------------------------------------------------------------------------------|-------------------------------------------------------------------------------------------------------------------------------------------------------------------------------------------------------------------------------|
| 23                              | Transcripts returned           | Were transcripts returned to participants for comments and/or correction?                                                              | No. Given the workloads of therapists involved, participants were not expected to review transcripts. The interviewer and co-moderator (LSC & YMY) discussed transcripts and made comments and corrections.                   |
| Domain 3: analysis and findings |                                |                                                                                                                                        |                                                                                                                                                                                                                               |
| <b>Data analysis</b>            |                                |                                                                                                                                        |                                                                                                                                                                                                                               |
| 24                              | Number of data coders          | How many data coders coded the data?                                                                                                   | Pages 10-11. Three researchers were involved in data analysis (LSC, NAL and AM). See 'Data Analysis'                                                                                                                          |
| 25                              | Description of the coding tree | Did authors provide a description of the coding tree?                                                                                  | Codebooks used are provided in Appendices 2 and 3.                                                                                                                                                                            |
| 26                              | Derivation of the themes       | Were themes identified in advance or derived from the data?                                                                            | Pages 10-11. In Phase one, themes were derived from the data in an inductive approach, in Phase two, themes were deductively derived from pre-determined theories with specified domains and categories. See 'Data analysis'. |
| 27                              | Software                       | What software, if applicable, was used to manage the data?                                                                             | N/a                                                                                                                                                                                                                           |
| 28                              | Participant checking           | Did participants provide feedback on the findings?                                                                                     | Given the workloads of therapists involved, participants were not expected to provide feedback on findings.                                                                                                                   |
| <b>Reporting</b>                |                                |                                                                                                                                        |                                                                                                                                                                                                                               |
| 29                              | Quotations presented           | Were participant quotations presented to illustrate the themes/findings? Was each quotation identified? <i>e.g. participant number</i> | Page 14-26. Participant quotes used to illustrate findings. Participants identified by discipline (e.g. Occupational therapist or physiotherapist) and site number. See 'Findings'                                            |



|    |                              |                                                                        |                                                                                                                                                                            |
|----|------------------------------|------------------------------------------------------------------------|----------------------------------------------------------------------------------------------------------------------------------------------------------------------------|
| 30 | Data and findings consistent | Was there consistency between the data presented and findings?         | Page 29. Consistency in triangulation between data analysis approaches and findings provided and examples given. See 'Discussion'.                                         |
| 31 | Clarity of major themes      | Were major themes clearly presented in the findings?                   | Page 14. An overview of major themes, along with prominent domains and categories from implementation theory, provided. See Table 3. (Detail also provided in 'Findings'). |
| 32 | Clarity of minor themes      | Is there a description of diverse cases or discussion of minor themes? | Page 14. A description of sub-themes is provided. See Table 3 and additional detail in 'Findings' > subthemes.                                                             |

## Consolidated criteria for reporting qualitative studies (COREQ): 32-item checklist

| No                                      | Item                                     | Guide Questions/Description                                                                                                                      | Reported on Page No. / Comment                                                                                                                                              |
|-----------------------------------------|------------------------------------------|--------------------------------------------------------------------------------------------------------------------------------------------------|-----------------------------------------------------------------------------------------------------------------------------------------------------------------------------|
| Domain 1: Research team and reflexivity |                                          |                                                                                                                                                  |                                                                                                                                                                             |
| <b>Personal Characteristics</b>         |                                          |                                                                                                                                                  |                                                                                                                                                                             |
| 1                                       | Interviewer/facilitator                  | Which author/s conducted the interview or focus group?                                                                                           | Page 8. Liana S Cahill (LSC) and Yvonne Mak-Yuen (YMY) conducted focus groups and interviews.                                                                               |
| 2                                       | Credentials                              | What were the researcher's credentials?                                                                                                          | Page 9. Credentials of LSC and YMY detailed under 'Research Team and Reflexivity'                                                                                           |
| 3                                       | Occupation                               | What was their occupation at the time of the study?                                                                                              | Page 9. LSC and YMY noted to be research occupational therapists under 'Research Team and Reflexivity'                                                                      |
| 4                                       | Gender                                   | Was the researcher male or female?                                                                                                               | Page 9. Researchers female as noted by female pronouns.                                                                                                                     |
| 5                                       | Experience and training                  | What experience or training did the researcher have?                                                                                             | Page 9. Professional training and background of researchers noted under 'Research Team and Reflexivity'                                                                     |
| <b>Relationship with participants</b>   |                                          |                                                                                                                                                  |                                                                                                                                                                             |
| 6                                       | Relationship established                 | Was a relationship established prior to study commencement?                                                                                      | Not for the purposes of the study. It is noted LSC previously worked with some participants, but not at the time of the study – see Page 9, 'Research Team and Reflexivity' |
| 7                                       | Participant knowledge of the interviewer | What did the participants know about the researcher? <i>e.g. personal goals, reasons for doing the research</i>                                  | Participants were aware LSC and YMY were completing their doctorates in somatosensory rehabilitation. See Page 9, 'Research Team and Reflexivity'.                          |
| 8                                       | Interviewer characteristics              | What characteristics were reported about the interviewer/facilitator? <i>e.g. Bias, assumptions, reasons and interests in the research topic</i> | Participants were likely aware of the interviewers' special interest in somatosensory rehabilitation stemming from                                                          |

|                               |                                       |                                                                                                                                                          |                                                                                                                                                            |
|-------------------------------|---------------------------------------|----------------------------------------------------------------------------------------------------------------------------------------------------------|------------------------------------------------------------------------------------------------------------------------------------------------------------|
|                               |                                       |                                                                                                                                                          | clinical practice. See Page 9, 'Research Team and Reflexivity'.                                                                                            |
| <b>Domain 2: study design</b> |                                       |                                                                                                                                                          |                                                                                                                                                            |
| <b>Theoretical framework</b>  |                                       |                                                                                                                                                          |                                                                                                                                                            |
| 9                             | Methodological orientation and Theory | What methodological orientation was stated to underpin the study? e.g. grounded theory, discourse analysis, ethnography, phenomenology, content analysis | Page 10-11. Thematic analysis and use of two theoretical frameworks (Theoretical Domains Theory and Normalisation Process Theory) is described.            |
| <b>Participant selection</b>  |                                       |                                                                                                                                                          |                                                                                                                                                            |
| 10                            | Sampling                              | How were participants selected? e.g. purposive, convenience, consecutive, snowball                                                                       | Page 8. Purposive recruitment of therapists to the study is described, see 'Participants'                                                                  |
| 11                            | Method of approach                    | How were participants approached? e.g. face-to-face, telephone, mail, email                                                                              | Page 8. Approach to health organisations via telephone and email and approach to therapists via face-to-face presentations described, see 'Participants'   |
| 12                            | Sample size                           | How many participants were in the study?                                                                                                                 | Page 11. Eighty seven occupational therapists and physiotherapists participated. See 'Findings'                                                            |
| 13                            | Non-participation                     | How many people refused to participate or dropped out? Reasons?                                                                                          | Page 8. All therapists attending recruitment presentations agreed to participate. No refusals or drop-outs occurred. See 'Participants'                    |
| <b>Setting</b>                |                                       |                                                                                                                                                          |                                                                                                                                                            |
| 14                            | Setting of data collection            | Where was the data collected? e.g. home, clinic, workplace                                                                                               | Page 8. Focus groups were held at therapists' health organisations. Separate interviews were held over the phone for those unable to attend. See 'Design'. |
| 15                            | Presence of non-participants          | Was anyone else present besides the participants and researchers?                                                                                        | Page 8. No. Two members of the research team (LSC and YMY) attended focus groups,                                                                          |

|                        |                        |                                                                                   |                                                                                                                                                                                                                                                                       |
|------------------------|------------------------|-----------------------------------------------------------------------------------|-----------------------------------------------------------------------------------------------------------------------------------------------------------------------------------------------------------------------------------------------------------------------|
|                        |                        |                                                                                   | no one else was present besides participants. See 'Design'.                                                                                                                                                                                                           |
| 16                     | Description of sample  | What are the important characteristics of the sample? e.g. demographic data, date | Page 8. Participants were graduate occupational therapists and physiotherapists who worked with stroke survivors at participating health organisations. See 'Participants'. A demographics table describing characteristics of participants is provided, see Table 1. |
| <b>Data collection</b> |                        |                                                                                   |                                                                                                                                                                                                                                                                       |
| 17                     | Interview guide        | Were questions, prompts, guides provided by the authors? Was it pilot tested?     | Page 8. Interview questions are provided in Appendix 1 and were guided by the Theoretical Domains Framework. Questions were not formally pilot tested but were discussed with the research group. See 'Design'.                                                       |
| 18                     | Repeat interviews      | Were repeat interviews carried out? If yes, how many?                             | Repeat interviews were not conducted, though individuals who missed original focus groups were followed up in individual or small group interviews.                                                                                                                   |
| 19                     | Audio/visual recording | Did the research use audio or visual recording to collect the data?               | Page 8. Interviews were audio-recorded. See 'Design'.                                                                                                                                                                                                                 |
| 20                     | Field notes            | Were field notes made during and/or after the interview or focus group?           | Page 8. Field notes were taken during and after each interview. See 'Design'.                                                                                                                                                                                         |
| 21                     | Duration               | What was the duration of the interviews or focus group?                           | Page 8. Focus groups were of 1-hour duration. See 'Design'.                                                                                                                                                                                                           |
| 22                     | Data saturation        | Was data saturation discussed?                                                    | Data saturation considered, n=87 therapists across 8 different health organisation was aimed to provide a representative sample                                                                                                                                       |

|                                 |                                |                                                                                                                                        |                                                                                                                                                                                                                               |
|---------------------------------|--------------------------------|----------------------------------------------------------------------------------------------------------------------------------------|-------------------------------------------------------------------------------------------------------------------------------------------------------------------------------------------------------------------------------|
| 23                              | Transcripts returned           | Were transcripts returned to participants for comments and/or correction?                                                              | No. Given the workloads of therapists involved, participants were not expected to review transcripts. The interviewer and co-moderator (LSC & YMY) discussed transcripts and made comments and corrections.                   |
| Domain 3: analysis and findings |                                |                                                                                                                                        |                                                                                                                                                                                                                               |
| <b>Data analysis</b>            |                                |                                                                                                                                        |                                                                                                                                                                                                                               |
| 24                              | Number of data coders          | How many data coders coded the data?                                                                                                   | Pages 10-11. Three researchers were involved in data analysis (LSC, NAL and AM). See 'Data Analysis'                                                                                                                          |
| 25                              | Description of the coding tree | Did authors provide a description of the coding tree?                                                                                  | Codebooks used are provided in Appendices 2 and 3.                                                                                                                                                                            |
| 26                              | Derivation of the themes       | Were themes identified in advance or derived from the data?                                                                            | Pages 10-11. In Phase one, themes were derived from the data in an inductive approach, in Phase two, themes were deductively derived from pre-determined theories with specified domains and categories. See 'Data analysis'. |
| 27                              | Software                       | What software, if applicable, was used to manage the data?                                                                             | N/a                                                                                                                                                                                                                           |
| 28                              | Participant checking           | Did participants provide feedback on the findings?                                                                                     | Given the workloads of therapists involved, participants were not expected to provide feedback on findings.                                                                                                                   |
| <b>Reporting</b>                |                                |                                                                                                                                        |                                                                                                                                                                                                                               |
| 29                              | Quotations presented           | Were participant quotations presented to illustrate the themes/findings? Was each quotation identified? <i>e.g. participant number</i> | Page 14-26. Participant quotes used to illustrate findings. Participants identified by discipline (e.g. Occupational therapist or physiotherapist) and site number. See 'Findings'                                            |

|    |                              |                                                                        |                                                                                                                                                                            |
|----|------------------------------|------------------------------------------------------------------------|----------------------------------------------------------------------------------------------------------------------------------------------------------------------------|
| 30 | Data and findings consistent | Was there consistency between the data presented and findings?         | Page 29. Consistency in triangulation between data analysis approaches and findings provided and examples given. See 'Discussion'.                                         |
| 31 | Clarity of major themes      | Were major themes clearly presented in the findings?                   | Page 14. An overview of major themes, along with prominent domains and categories from implementation theory, provided. See Table 3. (Detail also provided in 'Findings'). |
| 32 | Clarity of minor themes      | Is there a description of diverse cases or discussion of minor themes? | Page 14. A description of sub-themes is provided. See Table 3 and additional detail in 'Findings' > subthemes.                                                             |

1  
2  
3  
4  
5  
6  
7  
8  
9  
10  
11  
12  
13  
14  
15  
16  
17  
18  
19  
20  
21  
22  
23  
24  
25  
26  
27  
28  
29  
30  
31  
32  
33  
34  
35  
36  
37  
38  
39  
40  
41  
42  
43  
44  
45  
46
