# Supplementary material for: Factors influencing allied health professionals’ implementation of upper limb sensory rehabilitation for stroke survivors: a qualitative study to inform knowledge translation
Source: PubMed Central journal article supplement — BMJ Open. 2021 Feb 19;11(2):e042879. doi: 10.1136/bmjopen-2020-042879 (PMC7896620; doi:10.1136/bmjopen-2020-042879), 2021-02-19
Supplement: bmjopen-2020-042879supp001.pdf [file bmjopen-2020-042879supp001.pdf]

## Appendix 1.

### *Focus group and interview questions*

| Questions used in focus groups and interviews                                                                                                                |
|--------------------------------------------------------------------------------------------------------------------------------------------------------------|
| 1. <i>How able do you feel currently to change your practice regarding sensory assessment and treatment?</i>                                                 |
| 2. <i>What do you think some of the challenges will be in using new assessment and treatment approaches?</i>                                                 |
| 3. <i>What do you see as some of the strengths of this organisation in supporting your use of new sensory assessments and treatments?</i>                    |
| 4. <i>How do you feel about the prospect of changing the way you assess and treat sensory loss?</i>                                                          |
| 5. <i>Do you think the working environment (i.e. either cultural / physical) will impact on your ability to use new assessment and treatment approaches?</i> |
| 6. <i>What are the incentives for you currently, if any, to change your practice in the areas of sensory rehabilitation?</i>                                 |
| 7. <i>Do you think a change in practice in the area of sensory assessment and treatment will have a positive effect on patient outcomes?</i>                 |
