# Supplementary material for: Factors influencing allied health professionals’ implementation of upper limb sensory rehabilitation for stroke survivors: a qualitative study to inform knowledge translation
Source: PubMed Central journal article supplement — BMJ Open. 2021 Feb 19;11(2):e042879. doi: 10.1136/bmjopen-2020-042879 (PMC7896620; doi:10.1136/bmjopen-2020-042879), 2021-02-19
Supplement: bmjopen-2020-042879supp004.pdf [file bmjopen-2020-042879supp004.pdf]

## Appendix 4.

Study: Factors influencing allied health professionals' implementation of upper limb sensory rehabilitation for stroke survivors: A qualitative study to inform knowledge translation

### Number of quotes coded to Theoretical Domains Framework and Normalisation Process Theory domains and categories

*Theoretical Domains Framework (TDF):*

| TDF Domain                                        | SITE   |        |        |        |        |        |        |        |
|---------------------------------------------------|--------|--------|--------|--------|--------|--------|--------|--------|
|                                                   | Site 1 | Site 2 | Site 3 | Site 4 | Site 5 | Site 6 | Site 7 | Site 8 |
| <b>Knowledge</b>                                  | 5      | 3      | 7      | 7      | 13     | 6      | 15     | 13     |
| <b>Skills</b>                                     | 5      | 6      | 10     | 9      | 7      | 9      | 6      | 18     |
| <b>Social/Prof Role and Identity</b>              | 9      | 16     | 15     | 22     | 19     | 23     | 7      | 20     |
| <b>Beliefs about capabilities</b>                 | 4      | 3      | 4      | 1      | 8      | 12     | 4      | 12     |
| <b>Optimism</b>                                   | 3      | 8      | 7      | 3      | 8      | 1      | 14     | 11     |
| <b>Beliefs about consequences</b>                 | 7      | 7      | 4      | 12     | 3      | 6      | 15     | 17     |
| <b>Reinforcement</b>                              | 3      | 1      | 1      | 5      | 4      | 5      | 1      | 6      |
| <b>Intentions</b>                                 | 2      | 6      | 4      | 13     | 4      | 9      | 5      | 15     |
| <b>Goals</b>                                      | 5      | 6      | 4      | 4      | 7      | 5      | 0      | 10     |
| <b>Memory, attention &amp; decision processes</b> | 3      | 3      | 4      | 3      | 6      | 7      | 4      | 3      |
| <b>Environmental context and resources</b>        | 41     | 38     | 52     | 45     | 36     | 40     | 56     | 77     |
| <b>Social influences</b>                          | 9      | 6      | 8      | 4      | 10     | 24     | 13     | 11     |
| <b>Emotion</b>                                    | 8      | 1      | 8      | 7      | 5      | 9      | 4      | 14     |
| <b>Behavioural regulation</b>                     | 3      | 1      | 1      | 4      | 0      | 3      | 1      | 3      |

\* Green/shaded numbers indicate three domains coded to most frequently at each site

## Normalisation Process Theory (NPT):

| NPT Category and Construct     | SITE   |        |        |        |        |        |        |        |
|--------------------------------|--------|--------|--------|--------|--------|--------|--------|--------|
|                                | Site 1 | Site 2 | Site 3 | Site 4 | Site 5 | Site 6 | Site 7 | Site 8 |
| <b>COHERENCE</b>               |        |        |        |        |        |        |        |        |
| Differentiation                | 6      | 3      | 10     | 7      | 7      | 4      | 17     | 10     |
| Individual specification       | 14     | 3      | 14     | 3      | 11     | 5      | 10     | 14     |
| Communal specification         | 5      | 3      | 7      | 8      | 6      | 4      | 7      | 10     |
| Internalisation                | 7      | 9      | 15     | 15     | 11     | 6      | 8      | 15     |
| <b>COGNITIVE PARTICIPATION</b> |        |        |        |        |        |        |        |        |
| Initiation                     | 4      | 8      | 6      | 8      | 5      | 4      | 10     | 5      |
| Enrolment                      | 4      | 4      | 5      | 3      | 6      | 11     | 6      | 9      |
| Legitimation                   | 15     | 10     | 14     | 11     | 12     | 11     | 14     | 16     |
| Activation                     | 2      | 0      | 4      | 8      | 6      | 2      | 2      | 5      |
| <b>COLLECTIVE ACTION</b>       |        |        |        |        |        |        |        |        |
| Interactional workability      | 4      | 1      | 3      | 1      | 4      | 0      | 3      | 7      |
| Relational integration         | 3      | 0      | 3      | 2      | 0      | 1      | 2      | 2      |
| Contextual integration         | 7      | 0      | 5      | 2      | 1      | 2      | 3      | 8      |
| Skill set workability          | 5      | 0      | 1      | 2      | 0      | 3      | 1      | 0      |
| <b>REFLEXIVE MONITORING</b>    |        |        |        |        |        |        |        |        |
| Systematization                | 0      | 0      | 0      | 0      | 1      | 0      | 0      | 0      |
| Communal appraisal             | 0      | 0      | 0      | 0      | 0      | 0      | 0      | 0      |

|                      |   |   |   |   |   |   |   |   |
|----------------------|---|---|---|---|---|---|---|---|
| Individual appraisal | 0 | 0 | 3 | 1 | 1 | 0 | 1 | 1 |
| Reconfiguration      | 0 | 0 | 0 | 0 | 0 | 0 | 0 | 0 |

\* Green/shaded numbers indicate three domains coded to most frequently at each site
